# Supplementary material for: Integrative quantitation enables a comprehensive proteome comparison of two Mycoplasma pneumoniae genetic perturbations
Source: Royal Society of Chemistry journal article supplement (doi:10.1039/c3mb25581f), 2013-03-22
Supplement: c3mb25581f_2.xlsx [file c3mb25581f_2.xlsx]

## Sheet: Dimethyl
	Supplementary Table ST2A: List of proteins with significant changes in abundance (dimethyl)
	Mix1 - LDH vs WT (n=3)
	Uniprot Accession	Uniprot ID	Description	Fold Change (log2(LDH/WT))	Adjusted p-value
	P75460	NRDI_MYCPN	Protein nrdI	-3.77687	0
	P78028	DYR_MYCPN	Dihydrofolate reductase	-2.7364	0
	P78027	RIR1_MYCPN	Ribonucleoside-diphosphate reductase subunit alpha	-2.26818	7.90479e-14
	P75070	KITH_MYCPN	Thymidine kinase	-1.75649	1.35062e-08
	Q50330	ATPG_MYCPN	ATP synthase gamma chain	-1.44909	4.73446e-06
	P75062	Y052_MYCPN	Uncharacterized lipoprotein MG040 homolog	-1.32922	3.11566e-05
	P75089	ALF_MYCPN	Fructose-bisphosphate aldolase	-1.32278	3.31751e-05
	Q50329	ATPA_MYCPN	ATP synthase subunit alpha	-1.20566	0.000190011
	P75461	RIR2_MYCPN	Ribonucleoside-diphosphate reductase subunit beta	-1.11021	0.000649954
	P78011	GLYA_MYCPN	Serine hydroxymethyltransferase	-1.09917	0.000690316
	P75177	DPO3X_MYCPN	DNA polymerase III subunit gamma/tau	-1.09734	0.000690316
	P75206	AMPA_MYCPN	Probable cytosol aminopeptidase	-1.08276	0.000822449
	P78012	CH60_MYCPN	60 kDa chaperonin	-1.0452	0.00126801
	Q50331	ATPB_MYCPN	ATP synthase subunit beta	-0.991468	0.00244297
	P75396	Y386_MYCPN	Uncharacterized protein MG268 homolog	-0.934754	0.0042119
	P75591	NUSA_MYCPN	Transcription elongation protein nusA	-0.744974	0.0271232
	P75114	SYE_MYCPN	Glutamyl-tRNA synthetase	-0.743541	0.0271232
	P75250	IPYR_MYCPN	Inorganic pyrophosphatase	-0.733547	0.0290546
	P75558	UVRB_MYCPN	UvrABC system protein B	-0.727867	0.0302737
	P75245	ACKA_MYCPN	Acetate kinase	-0.695634	0.0393009
	P75361	P115_MYCPN	Protein P115 homolog	0.706089	0.0391988
	P75044	KPRS_MYCPN	Ribose-phosphate pyrophosphokinase	0.744646	0.0285649
	Q50295	RPOA_MYCPN	DNA-directed RNA polymerase subunit alpha	0.769957	0.0235779
	P75174	Y621_MYCPN	Uncharacterized protein MG423 homolog	0.772214	0.0234276
	P75532	Y239_MYCPN	Uncharacterized HTH-type transcriptional regulator MG101 homolog	0.860399	0.00971147
	P75271	RPOC_MYCPN	DNA-directed RNA polymerase subunit beta'	0.874936	0.00870902
	P78025	LON_MYCPN	ATP-dependent protease La	0.997002	0.00245638
	P75533	GATB_MYCPN	Aspartyl/glutamyl-tRNA(Asn/Gln) amidotransferase subunit B	1.01722	0.00198615
	P75544	EFG_MYCPN	Elongation factor G	1.0734	0.000987432
	P75358	G3P_MYCPN	Glyceraldehyde-3-phosphate dehydrogenase	1.07949	0.000932948
	P75482	Y295_MYCPN	Uncharacterized protein MG210.1 homolog	1.10637	0.000690316
	P75611	TKT_MYCPN	Transketolase	1.11508	0.000656679
	P75588	Y157_MYCPN	Uncharacterized protein MG144 homolog	1.16173	0.00036994
	P75064	GLPK_MYCPN	Glycerol kinase	1.2732	7.77927e-05
	P75389	NAOX_MYCPN	Probable NADH oxidase	1.56008	7.75084e-07
	P75569	PTG3C_MYCPN	PTS system glucose-specific EIICBA component	1.60507	3.43033e-07
	P75551	OPPF_MYCPN	Oligopeptide transport ATP-binding protein oppF	1.94961	2.53273e-10
	P78017	GRPE_MYCPN	Protein grpE	2.05622	2.04853e-11
	P75405	Y376_MYCPN	Uncharacterized protein MPN_376	2.33674	1.69388e-14
	P75512	THIO_MYCPN	Thioredoxin	3.22193	0
	Mix2 - LDH vs WT (n=3)
	Uniprot Accession	Uniprot ID	Description	Fold Change (log2(LDH/WT))	Adjusted p-value
	P75070	KITH_MYCPN	Thymidine kinase	-1.95378	0
	P75460	NRDI_MYCPN	Protein nrdI	-1.7111	0
	P75461	RIR2_MYCPN	Ribonucleoside-diphosphate reductase subunit beta	-1.59845	7.33894e-06
	P78027	RIR1_MYCPN	Ribonucleoside-diphosphate reductase subunit alpha	-1.28876	0
	P75588	Y157_MYCPN	Uncharacterized protein MG144 homolog	-0.949451	0.0101746
	P75053	DEOD_MYCPN	Purine nucleoside phosphorylase deoD-type	-0.841302	0.00432212
	Q50329	ATPA_MYCPN	ATP synthase subunit alpha	-0.70016	8.91594e-14
	P78028	DYR_MYCPN	Dihydrofolate reductase	-0.650161	0
	P78011	GLYA_MYCPN	Serine hydroxymethyltransferase	-0.596753	2.08765e-05
	P75205	CH10_MYCPN	10 kDa chaperonin	-0.574932	0.00985944
	P75545	RS7_MYCPN	30S ribosomal protein S7	-0.459711	0.000908663
	P78012	CH60_MYCPN	60 kDa chaperonin	-0.441372	6.90841e-05
	P75248	Y530_MYCPN	Uncharacterized protein MG354 homolog	-0.358741	0.0284945
	P75206	AMPA_MYCPN	Probable cytosol aminopeptidase	-0.26976	0.00384151
	P75611	TKT_MYCPN	Transketolase	-0.257676	0.00292282
	P75245	ACKA_MYCPN	Acetate kinase	-0.18595	0.000393482
	P75161	RRF_MYCPN	Ribosome-recycling factor	-0.13471	4.21718e-07
	P22446	GYRA_MYCPN	DNA gyrase subunit A	-0.129807	0.0154227
	P78019	GREA_MYCPN	Transcription elongation factor greA	-0.0757675	0.0180658
	P75264	Y134_MYCPN	Putative ABC transporter ATP-binding protein MG187 homolog	-0.0339473	0.0332258
	P75063	Y051_MYCPN	Uncharacterized protein MG039 homolog	-0.0089748	0.0145693
	P75089	ALF_MYCPN	Fructose-bisphosphate aldolase	0.0309793	1.17691e-06
	P75054	SRP54_MYCPN	Signal recognition particle protein	0.32327	8.03231e-05
	P75389	NAOX_MYCPN	Probable NADH oxidase	0.328623	0.00270812
	P75482	Y295_MYCPN	Uncharacterized protein MG210.1 homolog	0.341037	0.00575967
	P78007	LDH_MYCPN	L-lactate dehydrogenase	0.389652	0
	P75250	IPYR_MYCPN	Inorganic pyrophosphatase	0.512335	0.0385533
	P75512	THIO_MYCPN	Thioredoxin	0.547959	0
	P75551	OPPF_MYCPN	Oligopeptide transport ATP-binding protein oppF	0.570726	3.92486e-09
	P75409	CARDS_MYCPN	ADP-ribosylating toxin CARDS	0.594623	6.45194e-10
	P75396	Y386_MYCPN	Uncharacterized protein MG268 homolog	0.607892	4.04688e-05
	P75467	MRAZ_MYCPN	Protein mraZ	0.726189	0.00371627
	P78017	GRPE_MYCPN	Protein grpE	0.805756	4.05345e-06
	P75591	NUSA_MYCPN	Transcription elongation protein nusA	0.984257	0.00105563
	P75405	Y376_MYCPN	Uncharacterized protein MPN_376	1.87264	7.38648e-08
	Mix1 - PrkC vs WT (n=3)
	Uniprot Accession	Uniprot ID	Description	Fold Change (log2(PrkC/WT))	Adjusted p-value
	Q50360	HMW3_MYCPN	Cytadherence high molecular weight protein 3	-4.22882	0
	P75167	GPMI_MYCPN	2,3-bisphosphoglycerate-independent phosphoglycerate mutase	-3.52427	0
	Q50341	MGP3_MYCPN	Mgp-operon protein 3	-2.04119	3.99687e-11
	P75461	RIR2_MYCPN	Ribonucleoside-diphosphate reductase subunit beta	-1.76454	1.72445e-08
	P75070	KITH_MYCPN	Thymidine kinase	-1.6983	5.33062e-08
	P75354	DNAJM_MYCPN	DnaJ-like protein MG200 homolog	-1.52427	1.37959e-06
	P75560	RS2_MYCPN	30S ribosomal protein S2	-1.42912	6.27809e-06
	P75460	NRDI_MYCPN	Protein nrdI	-1.41385	7.45004e-06
	P78027	RIR1_MYCPN	Ribonucleoside-diphosphate reductase subunit alpha	-1.41385	7.45004e-06
	Q50329	ATPA_MYCPN	ATP synthase subunit alpha	-1.19907	0.000219882
	P75271	RPOC_MYCPN	DNA-directed RNA polymerase subunit beta'	-1.1958	0.000219882
	P75205	CH10_MYCPN	10 kDa chaperonin	-1.16353	0.00030327
	P75588	Y157_MYCPN	Uncharacterized protein MG144 homolog	-1.16353	0.00030327
	Q50331	ATPB_MYCPN	ATP synthase subunit beta	-1.04119	0.00154576
	P75089	ALF_MYCPN	Fructose-bisphosphate aldolase	-0.989353	0.00287437
	P78028	DYR_MYCPN	Dihydrofolate reductase	-0.9558	0.00393929
	P75033	Y153_MYCPN	Uncharacterized ATP-dependent helicase MG140 homolog	-0.906891	0.00695964
	P75052	TYPH_MYCPN	Thymidine phosphorylase	-0.808781	0.0188034
	P11311	ADP1_MYCPN	Adhesin P1	-0.774253	0.0254136
	P75483	Y294_MYCPN	Uncharacterized protein MPN_294	0.787783	0.0244582
	P75359	PTA_MYCPN	Phosphate acetyltransferase	0.807457	0.0202961
	P75396	Y386_MYCPN	Uncharacterized protein MG268 homolog	0.874275	0.0101375
	P75399	Y381_MYCPN	Uncharacterized protein MG263 homolog; Uncharacterized protein MPN_427; Uncharacterized protein MG265 homolog	0.900464	0.0080347
	P75591	NUSA_MYCPN	Transcription elongation protein nusA	0.967579	0.00384949
	P75466	Y071_MYCPN	S-adenosyl-L-methionine-dependent methyltransferase mraW; UPF0011 protein MG056 homolog	0.976296	0.00354468
	P75394	LPLA_MYCPN	Probable lipoate-protein ligase A	1.05864	0.00140087
	P75391	ODPB_MYCPN	Pyruvate dehydrogenase E1 component subunit beta	1.38262	1.40639e-05
	P75361	P115_MYCPN	Protein P115 homolog	1.44203	6.0517e-06
	P75174	Y621_MYCPN	Uncharacterized protein MG423 homolog	1.67406	9.59284e-08
	Q50313	DPO3B_MYCPN	DNA polymerase III subunit beta	1.72279	4.09346e-08
	Mix2 - PrkC vs WT (n=3)
	Uniprot Accession	Uniprot ID	Description	Fold Change (log2(PrkC/WT))	Adjusted p-value
	P75460	NRDI_MYCPN	Protein nrdI	-4.3491	7.56507e-08
	P75070	KITH_MYCPN	Thymidine kinase	-3.68139	4.87918e-10
	P78027	RIR1_MYCPN	Ribonucleoside-diphosphate reductase subunit alpha	-2.93971	9.37159e-05
	P75461	RIR2_MYCPN	Ribonucleoside-diphosphate reductase subunit beta	-1.39296	6.54429e-07
	P75591	NUSA_MYCPN	Transcription elongation protein nusA	-1.04532	0.00441791
	P75053	DEOD_MYCPN	Purine nucleoside phosphorylase deoD-type	-0.922832	0.0177652
	Q9EXD3	Y377_MYCPN	Uncharacterized protein MPN_377	-0.504653	0.000706606
	P75394	LPLA_MYCPN	Probable lipoate-protein ligase A	-0.468493	8.71212e-06
	Q50313	DPO3B_MYCPN	DNA polymerase III subunit beta	-0.434214	0.000215783
	P75159	T1SX_MYCPN	Putative type I restriction enzyme specificity protein MPN_638	-0.424284	0.0388849
	P75062	Y052_MYCPN	Uncharacterized lipoprotein MG040 homolog	-0.382351	0.0425455
	P09924	DEOC_MYCPN	Deoxyribose-phosphate aldolase	-0.231887	0.0496288
	P75354	DNAJM_MYCPN	DnaJ-like protein MG200 homolog	-0.225407	0.0067301
	P75466	Y071_MYCPN	S-adenosyl-L-methionine-dependent methyltransferase mraW; UPF0011 protein MG056 homolog	0.134047	8.06709e-05
	P75168	PT1_MYCPN	Phosphoenolpyruvate-protein phosphotransferase	0.138743	0.020838
	P75559	SECA_MYCPN	Protein translocase subunit secA	0.161338	0.0132789
	P75114	SYE_MYCPN	Glutamyl-tRNA synthetase	0.230219	0.0374713
	P75398	SYL_MYCPN	Leucyl-tRNA synthetase	0.406347	0.0268369
	P75391	ODPB_MYCPN	Pyruvate dehydrogenase E1 component subunit beta	0.489582	8.06709e-05
	P75247	CLPB_MYCPN	Chaperone protein clpB	0.499526	0.00475559
	P75358	G3P_MYCPN	Glyceraldehyde-3-phosphate dehydrogenase	0.520754	0.0411103
	P75144	MGP1_MYCPN	Mgp-operon protein 1	0.563293	0.000231784
	P75544	EFG_MYCPN	Elongation factor G	0.56728	1.29868e-05
	P75588	Y157_MYCPN	Uncharacterized protein MG144 homolog	0.84299	0.00609127
	P75467	MRAZ_MYCPN	Protein mraZ	0.937846	0.0426716
	P78017	GRPE_MYCPN	Protein grpE	1.42775	0.0238693
	P75405	Y376_MYCPN	Uncharacterized protein MPN_376	1.64549	2.50369e-09

## Sheet: iTraq4
	Supplementary Table ST2B: List of proteins with significant changes in abundance (itraq 4-plex)
	Mix1 - LDH vs WT (n=3)
	Uniprot Accession	Uniprot ID	Description	Fold Change (log2(LDH/WT))	Adjusted p-value
	P78028	DYR_MYCPN	Dihydrofolate reductase	-1.6797	0
	P78007	LDH_MYCPN	L-lactate dehydrogenase	-1.60807	0
	P75461	RIR2_MYCPN	Ribonucleoside-diphosphate reductase subunit beta	-1.32452	0
	P75070	KITH_MYCPN	Thymidine kinase	-1.16513	0
	P78029	TYSY_MYCPN	Thymidylate synthase	-1.09237	0
	P75125	Y666_MYCPN	Uncharacterized protein MG452 homolog	-1.05195	0
	P75206	AMPA_MYCPN	Probable cytosol aminopeptidase	-0.924374	0
	P78027	RIR1_MYCPN	Ribonucleoside-diphosphate reductase subunit alpha	-0.876072	0
	P75460	NRDI_MYCPN	Protein nrdI	-0.874716	0
	P75477	SCPB_MYCPN	Segregation and condensation protein B	-0.794289	0
	Q50292	Y195_MYCPN	Uncharacterized protein MG181 homolog	-0.777713	0
	P75069	SYH_MYCPN	Histidyl-tRNA synthetase	-0.743884	0
	Q50329	ATPA_MYCPN	ATP synthase subunit alpha	-0.719327	0
	Q50294	CBIO1_MYCPN	Putative ABC transporter ATP-binding protein MG304 homolog; Cobalt import ATP-binding protein cbiO 2; Cobalt import ATP-binding protein cbiO 1	-0.719327	0
	P75583	Y162_MYCPN	Uncharacterized lipoprotein MG149 homolog	-0.699978	0
	P75071	GLPF_MYCPN	Probable glycerol uptake facilitator protein	-0.651549	2.12733e-15
	P75053	DEOD_MYCPN	Purine nucleoside phosphorylase deoD-type	-0.64344	4.1217e-15
	P75080	DPO3_MYCPN	DNA polymerase III polC-type	-0.63079	1.64868e-14
	P75422	Y358_MYCPN	Uncharacterized protein MG255 homolog	-0.623936	3.04372e-14
	Q50330	ATPG_MYCPN	ATP synthase gamma chain	-0.595725	4.61631e-13
	P75177	DPO3X_MYCPN	DNA polymerase III subunit gamma/tau	-0.587923	9.45244e-13
	Q50316	Y685_MYCPN	Putative ABC transporter ATP-binding protein MG468.1 homolog	-0.574647	3.05556e-12
	Q50327	ATPF_MYCPN	ATP synthase subunit b	-0.553873	1.93239e-11
	P75515	Y259_MYCPN	Uncharacterized protein MG120 homolog	-0.548455	2.99952e-11
	P75221	MNMG_MYCPN	tRNA uridine 5-carboxymethylaminomethyl modification enzyme mnmG	-0.521668	2.85786e-10
	P75063	Y051_MYCPN	Uncharacterized protein MG039 homolog	-0.519547	3.35194e-10
	P75513	Y262_MYCPN	Uncharacterized protein MG123 homolog	-0.511091	6.65509e-10
	P78011	GLYA_MYCPN	Serine hydroxymethyltransferase	-0.505832	9.71819e-10
	P09924	DEOC_MYCPN	Deoxyribose-phosphate aldolase	-0.476727	9.52776e-09
	P75061	PTHP_MYCPN	Phosphocarrier protein HPr	-0.475699	1.01444e-08
	P75384	Y399_MYCPN	Uncharacterized protein MG280 homolog	-0.469542	1.6005e-08
	P75038	FRUK_MYCPN	Putative 1-phosphofructokinase	-0.468519	1.70242e-08
	P75145	PTMA_MYCPN	Mannitol-specific phosphotransferase enzyme IIA component	-0.461374	2.87474e-08
	P75068	SYD_MYCPN	Aspartyl-tRNA synthetase	-0.456292	4.13492e-08
	P75252	Y526_MYCPN	Uncharacterized protein MG350 homolog	-0.451228	5.82801e-08
	P75094	Y019_MYCPN	Putative ABC transporter ATP-binding protein MG015 homolog	-0.445175	8.93098e-08
	P75264	Y134_MYCPN	Putative ABC transporter ATP-binding protein MG187 homolog	-0.444169	9.46532e-08
	P78012	CH60_MYCPN	60 kDa chaperonin	-0.436143	1.61266e-07
	P78021	DNLJ_MYCPN	DNA ligase	-0.436143	1.61266e-07
	P75396	Y386_MYCPN	Uncharacterized protein MG268 homolog	-0.433144	1.96708e-07
	P75059	POTA_MYCPN	Spermidine/putrescine import ATP-binding protein potA	-0.401056	1.60143e-06
	P75062	Y052_MYCPN	Uncharacterized lipoprotein MG040 homolog	-0.395695	2.21748e-06
	P75429	Y349_MYCPN	Uncharacterized protein MG246 homolog	-0.370621	1.0153e-05
	P75527	DEF_MYCPN	Peptide deformylase	-0.362993	1.5751e-05
	P75109	Y684_MYCPN	Uncharacterized ABC transporter permease MG468 homolog	-0.362042	1.6304e-05
	P75248	Y530_MYCPN	Uncharacterized protein MG354 homolog	-0.360142	1.76732e-05
	P78009	EFTS_MYCPN	Elongation factor Ts	-0.358245	1.95717e-05
	P75055	GCP_MYCPN	Probable O-sialoglycoprotein endopeptidase	-0.356351	2.16617e-05
	P75399	Y381_MYCPN	Uncharacterized protein MG263 homolog; Uncharacterized protein MPN_427; Uncharacterized protein MG265 homolog	-0.355405	2.26653e-05
	P75298	CSD_MYCPN	Probable cysteine desulfurase	-0.350682	2.91836e-05
	P75351	HRCA_MYCPN	Heat-inducible transcription repressor hrcA	-0.349739	2.99952e-05
	P75612	Y081_MYCPN	Putative ABC transporter ATP-binding protein MG065 homolog	-0.346915	3.46264e-05
	P75364	Y423_MYCPN	Uncharacterized protein MG296 homolog	-0.345975	3.58536e-05
	P75054	SRP54_MYCPN	Signal recognition particle protein	-0.337541	5.62744e-05
	P75033	Y153_MYCPN	Uncharacterized ATP-dependent helicase MG140 homolog	-0.318051	0.000156144
	P22446	GYRA_MYCPN	DNA gyrase subunit A	-0.31713	0.000159742
	P75107	SYS_MYCPN	Seryl-tRNA synthetase	-0.31713	0.000159742
	P75510	SYW_MYCPN	Tryptophanyl-tRNA synthetase	-0.31713	0.000159742
	P75425	SYG_MYCPN	Glycyl-tRNA synthetase	-0.311613	0.000208218
	P75270	Y517_MYCPN	Uncharacterized protein MG342 homolog	-0.309778	0.000225318
	P75500	SYK_MYCPN	Lysyl-tRNA synthetase	-0.308862	0.000234357
	Q50315	Y687_MYCPN	Uncharacterized protein MPN_687	-0.305203	0.000278461
	P75052	TYPH_MYCPN	Thymidine phosphorylase	-0.302464	0.000317711
	P75081	UPP_MYCPN	Uracil phosphoribosyltransferase	-0.300641	0.000345734
	P75232	PLSX_MYCPN	Fatty acid/phospholipid synthesis protein plsX	-0.297912	0.000393609
	P75359	PTA_MYCPN	Phosphate acetyltransferase	-0.287946	0.000624652
	P75098	Y015_MYCPN	Uncharacterized protein MG011 homolog	-0.287044	0.000642873
	P75420	RF1_MYCPN	Peptide chain release factor 1	-0.287044	0.000642873
	P23568	EFTU_MYCPN	Elongation factor Tu	-0.28254	0.000781283
	P75349	Y126_MYCPN	Putative metallophosphoesterase MG207 homolog	-0.270894	0.00132206
	P75247	CLPB_MYCPN	Chaperone protein clpB	-0.265551	0.00162984
	P75426	DPO3A_MYCPN	Uncharacterized protein MG010 homolog; DNA primase; DNA polymerase III subunit alpha	-0.262	0.00187406
	P75553	OPPC_MYCPN	Oligopeptide transport system permease protein oppC	-0.254041	0.00264766
	P75144	MGP1_MYCPN	Mgp-operon protein 1	-0.253159	0.00271477
	P75122	SYY_MYCPN	Tyrosyl-tRNA synthetase	-0.252278	0.00280213
	P75590	IF2_MYCPN	Translation initiation factor IF-2	-0.232162	0.00647303
	P75212	Y566_MYCPN	Uncharacterized protein MG385 homolog; Uncharacterized protein MG293 homolog	-0.229558	0.00704963
	P41205	RS3_MYCPN	30S ribosomal protein S3	-0.227825	0.00745897
	P78004	DNAJ_MYCPN	Chaperone protein dnaJ	-0.222639	0.00903798
	P75044	KPRS_MYCPN	Ribose-phosphate pyrophosphokinase	-0.219192	0.0102681
	P75526	KGUA_MYCPN	Guanylate kinase	-0.215753	0.0114996
	P75175	Y620_MYCPN	Uncharacterized protein MG422 homolog	-0.214036	0.0121251
	P75521	SYN_MYCPN	Asparaginyl-tRNA synthetase	-0.214036	0.0121251
	P75089	ALF_MYCPN	Fructose-bisphosphate aldolase	-0.212322	0.01278
	P78033	G6PI_MYCPN	Glucose-6-phosphate isomerase	-0.212322	0.01278
	P75129	MSRB_MYCPN	Peptide methionine sulfoxide reductase msrB	-0.209754	0.0137393
	P75120	FTSH_MYCPN	Cell division protease ftsH homolog	-0.209754	0.0137393
	P78003	METK_MYCPN	S-adenosylmethionine synthetase	-0.209754	0.0137393
	Q50341	MGP3_MYCPN	Mgp-operon protein 3	-0.208899	0.0141003
	P75093	Y020_MYCPN	Uncharacterized ATP-dependent helicase MPN_020	-0.205484	0.0158984
	P75308	KCY_MYCPN	Cytidylate kinase	-0.201227	0.0184482
	P75114	SYE_MYCPN	Glutamyl-tRNA synthetase	-0.195288	0.0224001
	P75362	FTSY_MYCPN	Cell division protein ftsY homolog	-0.195288	0.0224001
	P75378	ACPH_MYCPN	Acyl carrier protein homolog	-0.194442	0.0229454
	P75310	Y474_MYCPN	Uncharacterized protein MG328 homolog	-0.188531	0.0278383
	P75223	Y555_MYCPN	Uncharacterized protein MG377 homolog	-0.181805	0.034159
	P75168	PT1_MYCPN	Phosphoenolpyruvate-protein phosphotransferase	-0.17011	0.0485667
	P75344	DNAK_MYCPN	Chaperone protein dnaK	0.175256	0.0466275
	P75466	Y071_MYCPN	S-adenosyl-L-methionine-dependent methyltransferase mraW; UPF0011 protein MG056 homolog	0.17591	0.0459108
	P22447	GYRB_MYCPN	DNA gyrase subunit B	0.17918	0.0415614
	P75525	PPH_MYCPN	Putative protein phosphatase	0.17918	0.0415614
	P75506	CNPD_MYCPN	2',3'-cyclic-nucleotide 2'-phosphodiesterase	0.188619	0.0309413
	P75218	ARCA_MYCPN	Putative arginine deiminase; Arginine deiminase-like protein	0.189592	0.030107
	P75390	ODPA_MYCPN	Pyruvate dehydrogenase E1 component subunit alpha	0.191535	0.0283409
	P78013	RPOB_MYCPN	DNA-directed RNA polymerase subunit beta	0.193477	0.0268163
	P75304	SYV_MYCPN	Valyl-tRNA synthetase	0.20218	0.0202314
	P75354	DNAJM_MYCPN	DnaJ-like protein MG200 homolog	0.21466	0.0133648
	P75542	SSB_MYCPN	Single-stranded DNA-binding protein	0.222287	0.010377
	P75184	Y611_MYCPN	Uncharacterized lipoprotein MG412 homolog	0.222287	0.010377
	Q59547	RL17_MYCPN	50S ribosomal protein L17	0.230504	0.00771641
	P75368	SYA_MYCPN	Alanyl-tRNA synthetase	0.232393	0.0072487
	P75239	RL7_MYCPN	50S ribosomal protein L7/L12	0.233652	0.00698185
	P75258	SYI_MYCPN	Isoleucyl-tRNA synthetase	0.23428	0.00685209
	Q9EXD4	Y388_MYCPN	Uncharacterized protein MG269.1 homolog	0.257354	0.00267367
	Q50295	RPOA_MYCPN	DNA-directed RNA polymerase subunit alpha	0.266604	0.00181104
	P75050	MANB_MYCPN	Phosphomannomutase	0.269061	0.00163196
	P75159	T1SX_MYCPN	Putative type I restriction enzyme specificity protein MPN_638	0.270288	0.00156505
	P75529	RNR_MYCPN	Ribonuclease R	0.272126	0.00144914
	P75188	MSRA_MYCPN	Peptide methionine sulfoxide reductase msrA	0.272126	0.00144914
	P75564	SYFA_MYCPN	Phenylalanyl-tRNA synthetase alpha chain	0.272738	0.00142915
	P78019	GREA_MYCPN	Transcription elongation factor greA	0.275184	0.00129528
	P75395	Y387_MYCPN	Uncharacterized protein MG269 homolog	0.278236	0.00113213
	P75551	OPPF_MYCPN	Oligopeptide transport ATP-binding protein oppF	0.28796	0.000724349
	P75124	GALU_MYCPN	UTP--glucose-1-phosphate uridylyltransferase	0.289775	0.000668477
	P75127	Y664_MYCPN	UPF0230 protein MG450 homolog; UPF0230 protein MG326 homolog	0.292193	0.000612638
	P78018	PGK_MYCPN	Phosphoglycerate kinase	0.294004	0.000565045
	P75470	Y311_MYCPN	Uncharacterized protein MG218.1 homolog	0.297618	0.000476456
	P75541	RS18_MYCPN	30S ribosomal protein S18	0.310793	0.000254597
	P75546	RS12_MYCPN	30S ribosomal protein S12	0.313771	0.000223661
	P75085	EFP_MYCPN	Elongation factor P	0.316743	0.000194745
	P75560	RS2_MYCPN	30S ribosomal protein S2	0.317929	0.000184531
	P75588	Y157_MYCPN	Uncharacterized protein MG144 homolog	0.325031	0.000132141
	P78017	GRPE_MYCPN	Protein grpE	0.330921	9.69122e-05
	P75228	THII_MYCPN	Probable thiamine biosynthesis protein thiI	0.337374	6.85406e-05
	P75471	HMW2_MYCPN	Cytadherence high molecular weight protein 2	0.340881	5.68675e-05
	P75176	UVRA_MYCPN	UvrABC system protein A	0.34438	4.7562e-05
	P75454	TIG_MYCPN	Trigger factor	0.348451	3.80775e-05
	P78031	KPYK_MYCPN	Pyruvate kinase	0.350193	3.51197e-05
	P75041	Y076_MYCPN	Uncharacterized protein MG061 homolog 1	0.350773	3.46264e-05
	Q59549	DNAA_MYCPN	Chromosomal replication initiator protein dnaA	0.353669	2.98791e-05
	P75048	Y068_MYCPN	Uncharacterized protein MG055 homolog	0.354248	2.91836e-05
	P53527	RPIB_MYCPN	Probable ribose-5-phosphate isomerase B	0.35656	2.60297e-05
	P75211	P200_MYCPN	Protein P200	0.364048	1.76383e-05
	P75532	Y239_MYCPN	Uncharacterized HTH-type transcriptional regulator MG101 homolog	0.365197	1.66505e-05
	P75367	Y566_MYCPN	Uncharacterized protein MG385 homolog; Uncharacterized protein MG293 homolog	0.365771	1.6304e-05
	P75131	RS16_MYCPN	30S ribosomal protein S16	0.370354	1.27696e-05
	Q50360	HMW3_MYCPN	Cytadherence high molecular weight protein 3	0.377203	8.60244e-06
	P78034	PTH_MYCPN	Peptidyl-tRNA hydrolase	0.38175	6.56789e-06
	P75552	OPPD_MYCPN	Oligopeptide transport ATP-binding protein oppD	0.386849	4.82876e-06
	P75611	TKT_MYCPN	Transketolase	0.388545	4.39101e-06
	P75482	Y295_MYCPN	Uncharacterized protein MG210.1 homolog	0.403157	1.75541e-06
	P75467	MRAZ_MYCPN	Protein mraZ	0.407066	1.39185e-06
	P75545	RS7_MYCPN	30S ribosomal protein S7	0.418453	6.57344e-07
	P75091	SYM_MYCPN	Methionyl-tRNA synthetase	0.423149	4.83413e-07
	P78032	TOP1_MYCPN	DNA topoisomerase 1	0.426454	3.90158e-07
	P75504	YHIT_MYCPN	Uncharacterized 16.1 kDa HIT-like protein	0.429751	3.14589e-07
	P75478	SCPA_MYCPN	Segregation and condensation protein A	0.436051	2.05068e-07
	Q9EXD8	ULAB_MYCPN	Ascorbate-specific phosphotransferase enzyme IIB component	0.446127	1.05721e-07
	P75442	Y336_MYCPN	Uncharacterized protein MG240 homolog	0.459095	4.34851e-08
	Q50310	RL29_MYCPN	50S ribosomal protein L29	0.482572	8.20165e-09
	Q50306	RL5_MYCPN	50S ribosomal protein L5	0.509833	9.64391e-10
	P75382	SYP_MYCPN	Prolyl-tRNA synthetase	0.512427	7.93537e-10
	Q50309	RS17_MYCPN	30S ribosomal protein S17	0.526356	2.67883e-10
	P75489	Y288_MYCPN	Uncharacterized lipoprotein MPN_288	0.541677	7.35734e-11
	P75579	RL4_MYCPN	50S ribosomal protein L4	0.555328	2.30925e-11
	P75509	Y266_MYCPN	Uncharacterized protein MG127 homolog	0.571839	5.43348e-12
	P75389	NAOX_MYCPN	Probable NADH oxidase	0.578787	2.9976e-12
	P75233	RNC_MYCPN	Ribonuclease 3	0.583236	2.02903e-12
	P75581	RS10_MYCPN	30S ribosomal protein S10	0.62507	3.79197e-14
	P75554	OPPB_MYCPN	Oligopeptide transport system permease protein oppB	0.627466	3.04372e-14
	P75580	RL3_MYCPN	50S ribosomal protein L3	0.629857	2.4953e-14
	Q50314	PARA_MYCPN	ParA family protein MPN_688	0.637007	1.31894e-14
	P75409	CARDS_MYCPN	ADP-ribosylating toxin CARDS	0.638433	1.16377e-14
	P78025	LON_MYCPN	ATP-dependent protease La	0.640806	9.99201e-15
	P75161	RRF_MYCPN	Ribosome-recycling factor	0.677795	0
	Q50308	RL14_MYCPN	50S ribosomal protein L14	0.721951	0
	P75405	Y376_MYCPN	Uncharacterized protein MPN_376	0.8489	0
	Q50365	HMW1_MYCPN	Cytadherence high molecular weight protein 1	0.854637	0
	P78024	IF3_MYCPN	Translation initiation factor IF-3	0.855454	0
	P75577	RL2_MYCPN	50S ribosomal protein L2	0.878966	0
	Q50301	RS5_MYCPN	30S ribosomal protein S5	0.91353	0
	P46775	RS4_MYCPN	30S ribosomal protein S4	1.05157	0
	P75481	Y297_MYCPN	Uncharacterized protein MG211 homolog	1.07211	0
	P75229	Y549_MYCPN	Uncharacterized protein MG371 homolog	1.13474	0
	P78035	RL1_MYCPN	50S ribosomal protein L1	1.15115	0
	P75383	Y400_MYCPN	Uncharacterized protein MG281 homolog	1.25333	0
	P75133	RL19_MYCPN	50S ribosomal protein L19	1.34961	0
	P75512	THIO_MYCPN	Thioredoxin	1.56436	0
	P78023	RL20_MYCPN	50S ribosomal protein L20	1.67675	0
	Mix2 - LDH vs WT (n=3)
	Uniprot Accession	Uniprot ID	Description	Fold Change (log2(LDH/WT))	Adjusted p-value
	P78028	DYR_MYCPN	Dihydrofolate reductase	-1.87472	0
	P75070	KITH_MYCPN	Thymidine kinase	-1.33867	0
	P75460	NRDI_MYCPN	Protein nrdI	-1.28606	0
	P78029	TYSY_MYCPN	Thymidylate synthase	-1.16917	0
	P78007	LDH_MYCPN	L-lactate dehydrogenase	-1.11245	0
	P75125	Y666_MYCPN	Uncharacterized protein MG452 homolog	-1.08011	0
	P75094	Y019_MYCPN	Putative ABC transporter ATP-binding protein MG015 homolog	-1.04066	0
	P78027	RIR1_MYCPN	Ribonucleoside-diphosphate reductase subunit alpha	-1.01445	0
	P75071	GLPF_MYCPN	Probable glycerol uptake facilitator protein	-0.956042	0
	P75461	RIR2_MYCPN	Ribonucleoside-diphosphate reductase subunit beta	-0.89991	0
	P75583	Y162_MYCPN	Uncharacterized lipoprotein MG149 homolog	-0.799057	0
	P75206	AMPA_MYCPN	Probable cytosol aminopeptidase	-0.71967	6.99441e-15
	P75080	DPO3_MYCPN	DNA polymerase III polC-type	-0.683985	1.67283e-13
	P75438	Y340_MYCPN	Probable DNA helicase MPN_340	-0.68277	1.80018e-13
	P75062	Y052_MYCPN	Uncharacterized lipoprotein MG040 homolog	-0.664668	8.11351e-13
	P75038	FRUK_MYCPN	Putative 1-phosphofructokinase	-0.659879	1.18231e-12
	P75421	Y359_MYCPN	Uncharacterized protein MG256 homolog	-0.642061	4.94762e-12
	P78011	GLYA_MYCPN	Serine hydroxymethyltransferase	-0.634994	8.59033e-12
	P75177	DPO3X_MYCPN	DNA polymerase III subunit gamma/tau	-0.631474	1.11451e-11
	Q50329	ATPA_MYCPN	ATP synthase subunit alpha	-0.626794	1.58569e-11
	P75396	Y386_MYCPN	Uncharacterized protein MG268 homolog	-0.622129	2.24862e-11
	P75054	SRP54_MYCPN	Signal recognition particle protein	-0.616318	3.48373e-11
	Q50292	Y195_MYCPN	Uncharacterized protein MG181 homolog	-0.612265	4.68526e-11
	P75109	Y684_MYCPN	Uncharacterized ABC transporter permease MG468 homolog	-0.58194	4.58215e-10
	P75063	Y051_MYCPN	Uncharacterized protein MG039 homolog	-0.577417	6.15083e-10
	Q50330	ATPG_MYCPN	ATP synthase gamma chain	-0.571784	8.95293e-10
	Q50316	Y685_MYCPN	Putative ABC transporter ATP-binding protein MG468.1 homolog	-0.559467	2.1097e-09
	P75351	HRCA_MYCPN	Heat-inducible transcription repressor hrcA	-0.558353	2.24271e-09
	P75061	PTHP_MYCPN	Phosphocarrier protein HPr	-0.555014	2.79623e-09
	P75252	Y526_MYCPN	Uncharacterized protein MG350 homolog	-0.548361	4.3263e-09
	P75422	Y358_MYCPN	Uncharacterized protein MG255 homolog	-0.54615	4.96755e-09
	P75089	ALF_MYCPN	Fructose-bisphosphate aldolase	-0.541738	6.65156e-09
	P75053	DEOD_MYCPN	Purine nucleoside phosphorylase deoD-type	-0.536242	9.58047e-09
	P78012	CH60_MYCPN	60 kDa chaperonin	-0.516628	3.4023e-08
	Q50293	CBIO1_MYCPN	Putative ABC transporter ATP-binding protein MG304 homolog; Cobalt import ATP-binding protein cbiO 2; Cobalt import ATP-binding protein cbiO 1	-0.503699	7.73701e-08
	P75221	MNMG_MYCPN	tRNA uridine 5-carboxymethylaminomethyl modification enzyme mnmG	-0.484519	2.52347e-07
	P75477	SCPB_MYCPN	Segregation and condensation protein B	-0.480292	3.19353e-07
	P75539	DNAB_MYCPN	Replicative DNA helicase	-0.468729	6.07584e-07
	P75349	Y126_MYCPN	Putative metallophosphoesterase MG207 homolog	-0.463504	8.12128e-07
	P75068	SYD_MYCPN	Aspartyl-tRNA synthetase	-0.457258	1.13608e-06
	P75069	SYH_MYCPN	Histidyl-tRNA synthetase	-0.440735	2.8779e-06
	P75426	DPO3A_MYCPN	Uncharacterized protein MG010 homolog; DNA primase; DNA polymerase III subunit alpha	-0.440735	2.8779e-06
	P09924	DEOC_MYCPN	Deoxyribose-phosphate aldolase	-0.438683	3.1988e-06
	P75515	Y259_MYCPN	Uncharacterized protein MG120 homolog	-0.436633	3.55357e-06
	P75384	Y399_MYCPN	Uncharacterized protein MG280 homolog	-0.408245	1.55871e-05
	P75538	Y233_MYCPN	Uncharacterized lipoprotein MG095 homolog	-0.385336	4.93425e-05
	P75033	Y153_MYCPN	Uncharacterized ATP-dependent helicase MG140 homolog	-0.380404	6.264e-05
	P75088	Y026_MYCPN	Probable GTP-binding protein MG024 homolog	-0.361328	0.000151807
	P75107	SYS_MYCPN	Seryl-tRNA synthetase	-0.359871	0.000159651
	P75558	UVRB_MYCPN	UvrABC system protein B	-0.359871	0.000159651
	P75093	Y020_MYCPN	Uncharacterized ATP-dependent helicase MPN_020	-0.353091	0.000217911
	P75498	LEPA_MYCPN	GTP-binding protein lepA	-0.347304	0.000282568
	Q50288	Y200_MYCPN	Uncharacterized lipoprotein MPN_200	-0.340583	0.000380816
	P75308	KCY_MYCPN	Cytidylate kinase	-0.329133	0.00060716
	P75129	MSRB_MYCPN	Peptide methionine sulfoxide reductase msrB	-0.326285	0.000681878
	P78021	DNLJ_MYCPN	DNA ligase	-0.325336	0.000704488
	P75176	UVRA_MYCPN	UvrABC system protein A	-0.32155	0.000822946
	P75302	Y483_MYCPN	Uncharacterized glycosyltransferase MG335.2 homolog	-0.320605	0.000849792
	P75175	Y620_MYCPN	Uncharacterized protein MG422 homolog	-0.318716	0.000913656
	P75264	Y134_MYCPN	Putative ABC transporter ATP-binding protein MG187 homolog	-0.314006	0.00108841
	P75534	GATA_MYCPN	Glutamyl-tRNA(Gln) amidotransferase subunit A	-0.314006	0.00108841
	P78009	EFTS_MYCPN	Elongation factor Ts	-0.303698	0.00161766
	P75329	Y454_MYCPN	Uncharacterized protein MG319 homolog	-0.301832	0.00173204
	P75248	Y530_MYCPN	Uncharacterized protein MG354 homolog	-0.2833	0.0034748
	P75354	DNAJM_MYCPN	DnaJ-like protein MG200 homolog	-0.275037	0.00472398
	P23568	EFTU_MYCPN	Elongation factor Tu	-0.274122	0.00485238
	Q50341	MGP3_MYCPN	Mgp-operon protein 3	-0.272294	0.00515697
	P75081	UPP_MYCPN	Uracil phosphoribosyltransferase	-0.27138	0.00529583
	P75387	Y396_MYCPN	Uncharacterized protein MG277 homolog	-0.267733	0.00601569
	P75246	Y532_MYCPN	Uncharacterized protein MG356 homolog	-0.263186	0.00694787
	P75247	CLPB_MYCPN	Chaperone protein clpB	-0.263186	0.00694787
	P75510	SYW_MYCPN	Tryptophanyl-tRNA synthetase	-0.260011	0.00773413
	Q50327	ATPF_MYCPN	ATP synthase subunit b	-0.259559	0.00780488
	Q50332	ATPE_MYCPN	ATP synthase epsilon chain	-0.256844	0.00847732
	P75098	Y015_MYCPN	Uncharacterized protein MG011 homolog	-0.252332	0.00973324
	P75441	Y337_MYCPN	Uncharacterized protein MG241 homolog	-0.248732	0.010808
	P75425	SYG_MYCPN	Glycyl-tRNA synthetase	-0.246935	0.0113453
	P75052	TYPH_MYCPN	Thymidine phosphorylase	-0.243348	0.0126545
	P75513	Y262_MYCPN	Uncharacterized protein MG123 homolog	-0.231753	0.018365
	P75120	FTSH_MYCPN	Cell division protease ftsH homolog	-0.229978	0.019207
	Q59547	RL17_MYCPN	50S ribosomal protein L17	-0.229978	0.019207
	P75055	GCP_MYCPN	Probable O-sialoglycoprotein endopeptidase	-0.228204	0.0199567
	P75174	Y621_MYCPN	Uncharacterized protein MG423 homolog	-0.228204	0.0199567
	P75590	IF2_MYCPN	Translation initiation factor IF-2	-0.225548	0.0214594
	P75399	Y381_MYCPN	Uncharacterized protein MG263 homolog; Uncharacterized protein MPN_427; Uncharacterized protein MG265 homolog	-0.225548	0.0214594
	P75429	Y349_MYCPN	Uncharacterized protein MG246 homolog	-0.224664	0.0219361
	P78004	DNAJ_MYCPN	Chaperone protein dnaJ	-0.219369	0.0257525
	P75223	Y555_MYCPN	Uncharacterized protein MG377 homolog	-0.215851	0.0285411
	P75386	SPOT_MYCPN	Probable guanosine-3',5'-bis(diphosphate) 3'-pyrophosphohydrolase	-0.208839	0.0348858
	P78033	G6PI_MYCPN	Glucose-6-phosphate isomerase	-0.201861	0.0423672
	P75270	Y517_MYCPN	Uncharacterized protein MG342 homolog	-0.198384	0.0465787
	P75269	Y518_MYCPN	Uncharacterized protein MG343 homolog	-0.195783	0.0495952
	P75403	EX53_MYCPN	5'-3' exonuclease	0.195007	0.0475045
	P75305	AZOR_MYCPN	FMN-dependent NADH-azoreductase	0.202916	0.0384099
	P78017	GRPE_MYCPN	Protein grpE	0.209474	0.0319454
	P75471	HMW2_MYCPN	Cytadherence high molecular weight protein 2	0.225739	0.0199567
	P75165	PYRH_MYCPN	Uridylate kinase	0.23026	0.017894
	P75446	Y118_MYCPN	Uncharacterized protein MG199 homolog	0.241823	0.0123285
	P75390	ODPA_MYCPN	Pyruvate dehydrogenase E1 component subunit alpha	0.245656	0.0109559
	P75083	Y031_MYCPN	Uncharacterized protein MG028 homolog	0.246294	0.010808
	P78019	GREA_MYCPN	Transcription elongation factor greA	0.248843	0.0100107
	P75205	CH10_MYCPN	10 kDa chaperonin	0.252658	0.00887828
	Q50306	RL5_MYCPN	50S ribosomal protein L5	0.253927	0.00854759
	P75392	ODP2_MYCPN	Dihydrolipoyllysine-residue acetyltransferase component of pyruvate dehydrogenase complex	0.255196	0.00828634
	P75295	Y491_MYCPN	Uncharacterized protein MPN_491	0.262782	0.00653519
	P75518	Y256_MYCPN	Uncharacterized protein MG117 homolog	0.28282	0.00323981
	Q50297	RS13_MYCPN	30S ribosomal protein S13	0.286546	0.00282297
	P75187	Y608_MYCPN	Uncharacterized protein MG409 homolog	0.292735	0.00222637
	P75470	Y311_MYCPN	Uncharacterized protein MG218.1 homolog	0.298898	0.00174992
	P75551	OPPF_MYCPN	Oligopeptide transport ATP-binding protein oppF	0.30197	0.0015807
	P75580	RL3_MYCPN	50S ribosomal protein L3	0.302583	0.00155386
	P75466	Y071_MYCPN	S-adenosyl-L-methionine-dependent methyltransferase mraW; UPF0011 protein MG056 homolog	0.308704	0.0012151
	P75327	Y456_MYCPN	Uncharacterized lipoprotein MG321 homolog	0.314191	0.000988255
	P78032	TOP1_MYCPN	DNA topoisomerase 1	0.328721	0.000558972
	P75225	SYT_MYCPN	Threonyl-tRNA synthetase	0.33173	0.000493424
	P75085	EFP_MYCPN	Elongation factor P	0.334732	0.000435251
	P54125	PEPF_MYCPN	Oligoendopeptidase F homolog	0.335931	0.000416145
	P53527	RPIB_MYCPN	Probable ribose-5-phosphate isomerase B	0.360004	0.000144979
	P75211	P200_MYCPN	Protein P200	0.360888	0.000140325
	P75546	RS12_MYCPN	30S ribosomal protein S12	0.361477	0.000137766
	P75542	SSB_MYCPN	Single-stranded DNA-binding protein	0.369697	9.32674e-05
	Q59549	DNAA_MYCPN	Chromosomal replication initiator protein dnaA	0.383682	4.77916e-05
	P75509	Y266_MYCPN	Uncharacterized protein MG127 homolog	0.393506	2.9133e-05
	Q9EXD8	ULAB_MYCPN	Ascorbate-specific phosphotransferase enzyme IIB component	0.398106	2.31448e-05
	P75161	RRF_MYCPN	Ribosome-recycling factor	0.407262	1.45352e-05
	P75091	SYM_MYCPN	Methionyl-tRNA synthetase	0.417494	8.4284e-06
	Q50308	RL14_MYCPN	50S ribosomal protein L14	0.418627	8.00729e-06
	P75579	RL4_MYCPN	50S ribosomal protein L4	0.423711	6.10947e-06
	P75522	RPE_MYCPN	Probable ribulose-phosphate 3-epimerase	0.424275	5.98771e-06
	P75404	DPO3A_MYCPN	Uncharacterized protein MG010 homolog; DNA primase; DNA polymerase III subunit alpha	0.424275	5.98771e-06
	P75541	RS18_MYCPN	30S ribosomal protein S18	0.429902	4.46804e-06
	P78023	RL20_MYCPN	50S ribosomal protein L20	0.442761	2.27233e-06
	P75482	Y295_MYCPN	Uncharacterized protein MG210.1 homolog	0.454954	1.13608e-06
	P75467	MRAZ_MYCPN	Protein mraZ	0.454954	1.13608e-06
	P78034	PTH_MYCPN	Peptidyl-tRNA hydrolase	0.465951	6.10308e-07
	P75131	RS16_MYCPN	30S ribosomal protein S16	0.470326	4.79732e-07
	P75506	CNPD_MYCPN	2',3'-cyclic-nucleotide 2'-phosphodiesterase	0.471963	4.39732e-07
	P75552	OPPD_MYCPN	Oligopeptide transport ATP-binding protein oppD	0.475776	3.52214e-07
	P75511	Y264_MYCPN	Uncharacterized protein MG125 homolog	0.477407	3.22741e-07
	P75159	T1SX_MYCPN	Putative type I restriction enzyme specificity protein MPN_638	0.480664	2.70979e-07
	P75529	RNR_MYCPN	Ribonuclease R	0.483372	2.35411e-07
	P75478	SCPA_MYCPN	Segregation and condensation protein A	0.495228	1.12284e-07
	P75581	RS10_MYCPN	30S ribosomal protein S10	0.509116	4.67661e-08
	P75525	PPH_MYCPN	Putative protein phosphatase	0.515481	3.16101e-08
	P75382	SYP_MYCPN	Prolyl-tRNA synthetase	0.516539	2.99301e-08
	Q50360	HMW3_MYCPN	Cytadherence high molecular weight protein 3	0.523397	1.91567e-08
	P75239	RL7_MYCPN	50S ribosomal protein L7/L12	0.551543	2.94516e-09
	Q9EXD4	Y388_MYCPN	Uncharacterized protein MG269.1 homolog	0.567967	9.67764e-10
	P75389	NAOX_MYCPN	Probable NADH oxidase	0.569497	8.95293e-10
	Q50365	HMW1_MYCPN	Cytadherence high molecular weight protein 1	0.575094	6.15083e-10
	P75588	Y157_MYCPN	Uncharacterized protein MG144 homolog	0.589746	2.15492e-10
	Q50309	RS17_MYCPN	30S ribosomal protein S17	0.645459	3.12467e-12
	P78035	RL1_MYCPN	50S ribosomal protein L1	0.675137	2.74565e-13
	P75504	YHIT_MYCPN	Uncharacterized 16.1 kDa HIT-like protein	0.684582	1.32668e-13
	P75545	RS7_MYCPN	30S ribosomal protein S7	0.684582	1.32668e-13
	P75481	Y297_MYCPN	Uncharacterized protein MG211 homolog	0.703288	2.70129e-14
	P75453	Y109_MYCPN	Uncharacterized protein MPN_109	0.72862	2.41782e-15
	P75229	Y549_MYCPN	Uncharacterized protein MG371 homolog	0.735452	2.41782e-15
	P78025	LON_MYCPN	ATP-dependent protease La	0.742704	0
	P75127	Y664_MYCPN	UPF0230 protein MG450 homolog; UPF0230 protein MG326 homolog	0.794218	0
	P75489	Y288_MYCPN	Uncharacterized lipoprotein MPN_288	0.806382	0
	P75577	RL2_MYCPN	50S ribosomal protein L2	0.818015	0
	P75405	Y376_MYCPN	Uncharacterized protein MPN_376	0.831682	0
	P46775	RS4_MYCPN	30S ribosomal protein S4	0.861551	0
	P75409	CARDS_MYCPN	ADP-ribosylating toxin CARDS	0.873988	0
	Q50301	RS5_MYCPN	30S ribosomal protein S5	0.932237	0
	P75554	OPPB_MYCPN	Oligopeptide transport system permease protein oppB	0.969417	0
	P75512	THIO_MYCPN	Thioredoxin	0.981345	0
	P78024	IF3_MYCPN	Translation initiation factor IF-3	1.01804	0
	Q50314	PARA_MYCPN	ParA family protein MPN_688	1.02066	0
	P75383	Y400_MYCPN	Uncharacterized protein MG281 homolog	1.08911	0
	P75133	RL19_MYCPN	50S ribosomal protein L19	1.19203	0
	Mix1 - PrkC vs WT (n=3)
	Uniprot Accession	Uniprot ID	Description	Fold Change (log2(PrkC/WT))	Adjusted p-value
	P75471	HMW2_MYCPN	Cytadherence high molecular weight protein 2	-1.19172	0
	P75461	RIR2_MYCPN	Ribonucleoside-diphosphate reductase subunit beta	-1.08692	0
	P78028	DYR_MYCPN	Dihydrofolate reductase	-0.893703	0
	P75048	Y068_MYCPN	Uncharacterized protein MG055 homolog	-0.807896	0
	P75395	Y387_MYCPN	Uncharacterized protein MG269 homolog	-0.804114	0
	P75221	MNMG_MYCPN	tRNA uridine 5-carboxymethylaminomethyl modification enzyme mnmG	-0.79658	0
	Q50315	Y687_MYCPN	Uncharacterized protein MPN_687	-0.705586	0
	P75211	P200_MYCPN	Protein P200	-0.663867	0
	Q50292	Y195_MYCPN	Uncharacterized protein MG181 homolog	-0.643451	1.31894e-14
	P75460	NRDI_MYCPN	Protein nrdI	-0.636709	2.9976e-14
	P75083	Y031_MYCPN	Uncharacterized protein MG028 homolog	-0.63335	3.84692e-14
	P75246	Y532_MYCPN	Uncharacterized protein MG356 homolog	-0.629999	5.07287e-14
	Q50360	HMW3_MYCPN	Cytadherence high molecular weight protein 3	-0.613359	2.44947e-13
	P75091	SYM_MYCPN	Methionyl-tRNA synthetase	-0.610053	3.16547e-13
	Q50365	HMW1_MYCPN	Cytadherence high molecular weight protein 1	-0.603466	5.60552e-13
	P78027	RIR1_MYCPN	Ribonucleoside-diphosphate reductase subunit alpha	-0.545493	9.0891e-11
	P75518	Y256_MYCPN	Uncharacterized protein MG117 homolog	-0.545493	9.0891e-11
	P75070	KITH_MYCPN	Thymidine kinase	-0.542339	1.14415e-10
	P78029	TYSY_MYCPN	Thymidylate synthase	-0.536053	1.89114e-10
	P75069	SYH_MYCPN	Histidyl-tRNA synthetase	-0.4928	6.11108e-09
	P75092	PIP_MYCPN	Putative proline iminopeptidase	-0.477661	1.93675e-08
	P75302	Y483_MYCPN	Uncharacterized glycosyltransferase MG335.2 homolog	-0.459702	7.33102e-08
	Q50341	MGP3_MYCPN	Mgp-operon protein 3	-0.447852	1.69825e-07
	P78023	RL20_MYCPN	50S ribosomal protein L20	-0.430258	5.59914e-07
	P75453	Y109_MYCPN	Uncharacterized protein MPN_109	-0.427347	6.65094e-07
	P75115	Y677_MYCPN	Uncharacterized protein MG461 homolog	-0.418647	1.17692e-06
	P75121	Y670_MYCPN	Uncharacterized protein MG456 homolog	-0.38719	8.86931e-06
	P75579	RL4_MYCPN	50S ribosomal protein L4	-0.375918	1.70318e-05
	P75329	Y454_MYCPN	Uncharacterized protein MG319 homolog	-0.370316	2.22402e-05
	P41204	RL16_MYCPN	50S ribosomal protein L16	-0.370316	2.22402e-05
	P75061	PTHP_MYCPN	Phosphocarrier protein HPr	-0.364735	2.972e-05
	P75089	ALF_MYCPN	Fructose-bisphosphate aldolase	-0.361952	3.43084e-05
	Q50304	RS8_MYCPN	30S ribosomal protein S8	-0.356403	4.55888e-05
	P75462	Y319_MYCPN	Uncharacterized protein MG226 homolog	-0.34812	7.07915e-05
	P78019	GREA_MYCPN	Transcription elongation factor greA	-0.342624	9.3054e-05
	P75546	RS12_MYCPN	30S ribosomal protein S12	-0.339884	0.000106525
	P75308	KCY_MYCPN	Cytidylate kinase	-0.337149	0.000119479
	P75533	GATB_MYCPN	Aspartyl/glutamyl-tRNA(Asn/Gln) amidotransferase subunit B	-0.328975	0.000171537
	Q50297	RS13_MYCPN	30S ribosomal protein S13	-0.328975	0.000171537
	P75167	GPMI_MYCPN	2,3-bisphosphoglycerate-independent phosphoglycerate mutase	-0.328975	0.000171537
	P75588	Y157_MYCPN	Uncharacterized protein MG144 homolog	-0.326261	0.000195541
	P75354	DNAJM_MYCPN	DnaJ-like protein MG200 homolog	-0.315454	0.000337493
	P75584	Y161_MYCPN	Uncharacterized protein MG148 homolog	-0.312765	0.000382426
	P75206	AMPA_MYCPN	Probable cytosol aminopeptidase	-0.307401	0.000489449
	Q50329	ATPA_MYCPN	ATP synthase subunit alpha	-0.307401	0.000489449
	P75304	SYV_MYCPN	Valyl-tRNA synthetase	-0.303392	0.000591874
	P78024	IF3_MYCPN	Translation initiation factor IF-3	-0.302058	0.000623729
	P75516	Y258_MYCPN	Putative carbohydrate transport ATP-binding protein MPN_258	-0.291431	0.00101461
	P75240	RL10_MYCPN	50S ribosomal protein L10	-0.291431	0.00101461
	P75470	Y311_MYCPN	Uncharacterized protein MG218.1 homolog	-0.273018	0.00225485
	Q9EXD8	ULAB_MYCPN	Ascorbate-specific phosphotransferase enzyme IIB component	-0.262602	0.00339412
	P75247	CLPB_MYCPN	Chaperone protein clpB	-0.257422	0.0042221
	P75094	Y019_MYCPN	Putative ABC transporter ATP-binding protein MG015 homolog	-0.25226	0.00510195
	P11311	ADP1_MYCPN	Adhesin P1	-0.247117	0.0061442
	P75068	SYD_MYCPN	Aspartyl-tRNA synthetase	-0.244552	0.00666679
	Q50306	RL5_MYCPN	50S ribosomal protein L5	-0.244552	0.00666679
	Q50330	ATPG_MYCPN	ATP synthase gamma chain	-0.236885	0.00874858
	Q9EXD4	Y388_MYCPN	Uncharacterized protein MG269.1 homolog	-0.236885	0.00874858
	P75125	Y666_MYCPN	Uncharacterized protein MG452 homolog	-0.234338	0.00938154
	P75179	RS9_MYCPN	30S ribosomal protein S9	-0.234338	0.00938154
	P75364	Y423_MYCPN	Uncharacterized protein MG296 homolog	-0.231796	0.0102945
	P75580	RL3_MYCPN	50S ribosomal protein L3	-0.226725	0.0119945
	P78022	RPOD_MYCPN	RNA polymerase sigma factor rpoD	-0.224196	0.0128757
	P75085	EFP_MYCPN	Elongation factor P	-0.224196	0.0128757
	P75053	DEOD_MYCPN	Purine nucleoside phosphorylase deoD-type	-0.221672	0.0138177
	P75093	Y020_MYCPN	Uncharacterized ATP-dependent helicase MPN_020	-0.214125	0.0174906
	P78012	CH60_MYCPN	60 kDa chaperonin	-0.211618	0.0190556
	P22446	GYRA_MYCPN	DNA gyrase subunit A	-0.209115	0.0203884
	P75044	KPRS_MYCPN	Ribose-phosphate pyrophosphokinase	-0.206617	0.0219871
	P75205	CH10_MYCPN	10 kDa chaperonin	-0.206617	0.0219871
	Q50303	RL6_MYCPN	50S ribosomal protein L6	-0.199149	0.0276659
	P75517	GALE_MYCPN	UDP-glucose 4-epimerase	-0.194191	0.0320627
	P75239	RL7_MYCPN	50S ribosomal protein L7/L12	-0.186786	0.0405924
	P75560	RS2_MYCPN	30S ribosomal protein S2	-0.181871	0.0475123
	P78003	METK_MYCPN	S-adenosylmethionine synthetase	0.184511	0.0488263
	P75558	UVRB_MYCPN	UvrABC system protein B	0.193996	0.0362701
	P75394	LPLA_MYCPN	Probable lipoate-protein ligase A	0.197773	0.0320627
	P75165	PYRH_MYCPN	Uridylate kinase	0.199658	0.0304831
	P75295	Y491_MYCPN	Uncharacterized protein MPN_491	0.199658	0.0304831
	P75212	Y566_MYCPN	Uncharacterized protein MG385 homolog; Uncharacterized protein MG293 homolog	0.205297	0.0255365
	P75269	Y518_MYCPN	Uncharacterized protein MG343 homolog	0.207172	0.0240558
	P75401	Y381_MYCPN	Uncharacterized protein MG263 homolog; Uncharacterized protein MPN_427; Uncharacterized protein MG265 homolog	0.209044	0.0226531
	P75392	ODP2_MYCPN	Dihydrolipoyllysine-residue acetyltransferase component of pyruvate dehydrogenase complex	0.209044	0.0226531
	P75389	NAOX_MYCPN	Probable NADH oxidase	0.214647	0.0192001
	P75512	THIO_MYCPN	Thioredoxin	0.214647	0.0192001
	P75298	CSD_MYCPN	Probable cysteine desulfurase	0.220228	0.0160991
	P78025	LON_MYCPN	ATP-dependent protease La	0.220228	0.0160991
	P75455	Y330_MYCPN	Uncharacterized protein MG237 homolog	0.222083	0.0152639
	P75508	PPNK_MYCPN	Probable inorganic polyphosphate/ATP-NAD kinase	0.222083	0.0152639
	P75569	PTG3C_MYCPN	PTS system glucose-specific EIICBA component	0.222083	0.0152639
	P75396	Y386_MYCPN	Uncharacterized protein MG268 homolog	0.225787	0.0137179
	P75227	Y551_MYCPN	Uncharacterized protein MG373 homolog	0.225787	0.0137179
	P75476	K6PF_MYCPN	6-phosphofructokinase	0.229482	0.0123259
	P75442	Y336_MYCPN	Uncharacterized protein MG240 homolog	0.231326	0.0116832
	P75527	DEF_MYCPN	Peptide deformylase	0.233167	0.0109632
	P78009	EFTS_MYCPN	Elongation factor Ts	0.233167	0.0109632
	P75133	RL19_MYCPN	50S ribosomal protein L19	0.233167	0.0109632
	P75123	OHRL_MYCPN	Organic hydroperoxide resistance protein-like	0.238677	0.00933105
	P75382	SYP_MYCPN	Prolyl-tRNA synthetase	0.240509	0.00874858
	P75429	Y349_MYCPN	Uncharacterized protein MG246 homolog	0.247814	0.00666679
	P75040	Y077_MYCPN	Uncharacterized protein MG061 homolog 2	0.247814	0.00666679
	P75553	OPPC_MYCPN	Oligopeptide transport system permease protein oppC	0.253268	0.00559452
	Q59547	RL17_MYCPN	50S ribosomal protein L17	0.253268	0.00559452
	P75422	Y358_MYCPN	Uncharacterized protein MG255 homolog	0.255988	0.00510195
	P75376	Y408_MYCPN	Uncharacterized lipoprotein MPN_408	0.260509	0.00428267
	P75360	Y381_MYCPN	Uncharacterized protein MG263 homolog; Uncharacterized protein MPN_427; Uncharacterized protein MG265 homolog	0.267713	0.00322457
	Q9EXD3	Y377_MYCPN	Uncharacterized protein MPN_377	0.269509	0.00301132
	P75358	G3P_MYCPN	Glyceraldehyde-3-phosphate dehydrogenase	0.271302	0.00281159
	P75554	OPPB_MYCPN	Oligopeptide transport system permease protein oppB	0.274882	0.00241688
	P75359	PTA_MYCPN	Phosphate acetyltransferase	0.276669	0.00225485
	Q50308	RL14_MYCPN	50S ribosomal protein L14	0.278453	0.0021325
	P75409	CARDS_MYCPN	ADP-ribosylating toxin CARDS	0.280235	0.00198918
	P75457	END4_MYCPN	Probable endonuclease 4	0.285569	0.0015668
	P75270	Y517_MYCPN	Uncharacterized protein MG342 homolog	0.289113	0.00134047
	P75538	Y233_MYCPN	Uncharacterized lipoprotein MG095 homolog	0.301452	0.00076317
	P75511	Y264_MYCPN	Uncharacterized protein MG125 homolog	0.325816	0.000240466
	P75528	Y244_MYCPN	Uncharacterized protein MG105 homolog	0.336133	0.000149566
	P75420	RF1_MYCPN	Peptide chain release factor 1	0.337846	0.000138569
	P75223	Y555_MYCPN	Uncharacterized protein MG377 homolog	0.341265	0.000118953
	P75327	Y456_MYCPN	Uncharacterized lipoprotein MG321 homolog	0.346378	9.3054e-05
	P75405	Y376_MYCPN	Uncharacterized protein MPN_376	0.354859	6.06142e-05
	Q50310	RL29_MYCPN	50S ribosomal protein L29	0.36245	4.05584e-05
	P78034	PTH_MYCPN	Peptidyl-tRNA hydrolase	0.371674	2.50126e-05
	P75252	Y526_MYCPN	Uncharacterized protein MG350 homolog	0.375013	2.20125e-05
	P75466	Y071_MYCPN	S-adenosyl-L-methionine-dependent methyltransferase mraW; UPF0011 protein MG056 homolog	0.381669	1.54024e-05
	P75552	OPPD_MYCPN	Oligopeptide transport ATP-binding protein oppD	0.396534	6.35444e-06
	P75483	Y294_MYCPN	Uncharacterized protein MPN_294	0.438636	4.15572e-07
	P75467	MRAZ_MYCPN	Protein mraZ	0.511759	1.84448e-09
	P75391	ODPB_MYCPN	Pyruvate dehydrogenase E1 component subunit beta	0.53732	2.23421e-10
	P75506	CNPD_MYCPN	2',3'-cyclic-nucleotide 2'-phosphodiesterase	0.549933	9.0891e-11
	Q50293	CBIO1_MYCPN	Putative ABC transporter ATP-binding protein MG304 homolog; Cobalt import ATP-binding protein cbiO 2; Cobalt import ATP-binding protein cbiO 1	0.567554	2.05206e-11
	P75399	Y381_MYCPN	Uncharacterized protein MG263 homolog; Uncharacterized protein MPN_427; Uncharacterized protein MG265 homolog	0.585683	4.08097e-12
	Q50313	DPO3B_MYCPN	DNA polymerase III subunit beta	0.745162	0
	Mix2 - PrkC vs WT (n=3)
	Uniprot Accession	Uniprot ID	Description	Fold Change (log2(PrkC/WT))	Adjusted p-value
	P75461	RIR2_MYCPN	Ribonucleoside-diphosphate reductase subunit beta	-1.20077	0
	P75211	P200_MYCPN	Protein P200	-1.09414	0
	P75048	Y068_MYCPN	Uncharacterized protein MG055 homolog	-0.854546	0
	P75395	Y387_MYCPN	Uncharacterized protein MG269 homolog	-0.85144	0
	P75460	NRDI_MYCPN	Protein nrdI	-0.832944	0
	Q50292	Y195_MYCPN	Uncharacterized protein MG181 homolog	-0.715348	5.44009e-14
	P75070	KITH_MYCPN	Thymidine kinase	-0.709712	7.4607e-14
	P75302	Y483_MYCPN	Uncharacterized glycosyltransferase MG335.2 homolog	-0.627719	7.54405e-11
	P75098	Y015_MYCPN	Uncharacterized protein MG011 homolog	-0.61977	1.26609e-10
	P75470	Y311_MYCPN	Uncharacterized protein MG218.1 homolog	-0.614495	1.57256e-10
	Q50365	HMW1_MYCPN	Cytadherence high molecular weight protein 1	-0.593586	7.29005e-10
	P78023	RL20_MYCPN	50S ribosomal protein L20	-0.585823	1.12505e-09
	P75329	Y454_MYCPN	Uncharacterized protein MG319 homolog	-0.585823	1.12505e-09
	P78029	TYSY_MYCPN	Thymidylate synthase	-0.578101	1.87081e-09
	P78027	RIR1_MYCPN	Ribonucleoside-diphosphate reductase subunit alpha	-0.575536	2.12131e-09
	P75403	EX53_MYCPN	5'-3' exonuclease	-0.567869	3.31346e-09
	P75471	HMW2_MYCPN	Cytadherence high molecular weight protein 2	-0.56278	4.54532e-09
	P75085	EFP_MYCPN	Elongation factor P	-0.560242	5.18728e-09
	P78028	DYR_MYCPN	Dihydrofolate reductase	-0.550136	1.01753e-08
	P75205	CH10_MYCPN	10 kDa chaperonin	-0.51531	1.01752e-07
	P75167	GPMI_MYCPN	2,3-bisphosphoglycerate-independent phosphoglycerate mutase	-0.503074	2.1825e-07
	Q50303	RL6_MYCPN	50S ribosomal protein L6	-0.488525	5.33151e-07
	P75092	PIP_MYCPN	Putative proline iminopeptidase	-0.469353	1.51272e-06
	P78024	IF3_MYCPN	Translation initiation factor IF-3	-0.469353	1.51272e-06
	Q50304	RS8_MYCPN	30S ribosomal protein S8	-0.462229	2.25069e-06
	P75518	Y256_MYCPN	Uncharacterized protein MG117 homolog	-0.450432	4.25076e-06
	Q50341	MGP3_MYCPN	Mgp-operon protein 3	-0.399644	6.01806e-05
	P75089	ALF_MYCPN	Fructose-bisphosphate aldolase	-0.383852	0.000125855
	P75091	SYM_MYCPN	Methionyl-tRNA synthetase	-0.368231	0.000260565
	P75040	Y077_MYCPN	Uncharacterized protein MG061 homolog 2	-0.368231	0.000260565
	P75588	Y157_MYCPN	Uncharacterized protein MG144 homolog	-0.35938	0.000365105
	Q50308	RL14_MYCPN	50S ribosomal protein L14	-0.357176	0.000396957
	P75093	Y020_MYCPN	Uncharacterized ATP-dependent helicase MPN_020	-0.354975	0.000428274
	P78019	GREA_MYCPN	Transcription elongation factor greA	-0.337488	0.00087599
	P75125	Y666_MYCPN	Uncharacterized protein MG452 homolog	-0.330984	0.00112908
	P75383	Y400_MYCPN	Uncharacterized protein MG281 homolog	-0.32021	0.00171404
	Q50360	HMW3_MYCPN	Cytadherence high molecular weight protein 3	-0.315922	0.00202401
	P11311	ADP1_MYCPN	Adhesin P1	-0.307386	0.00271414
	P75304	SYV_MYCPN	Valyl-tRNA synthetase	-0.305259	0.00291765
	P75115	Y677_MYCPN	Uncharacterized protein MG461 homolog	-0.301016	0.00317756
	P75308	KCY_MYCPN	Cytidylate kinase	-0.292567	0.00411391
	P75516	Y258_MYCPN	Putative carbohydrate transport ATP-binding protein MPN_258	-0.292567	0.00411391
	P41205	RS3_MYCPN	30S ribosomal protein S3	-0.292567	0.00411391
	P75579	RL4_MYCPN	50S ribosomal protein L4	-0.286262	0.00513707
	P75121	Y670_MYCPN	Uncharacterized protein MG456 homolog	-0.282074	0.00589121
	P75539	DNAB_MYCPN	Replicative DNA helicase	-0.282074	0.00589121
	Q50329	ATPA_MYCPN	ATP synthase subunit alpha	-0.279985	0.00622835
	P75080	DPO3_MYCPN	DNA polymerase III polC-type	-0.259256	0.0127868
	P75229	Y549_MYCPN	Uncharacterized protein MG371 homolog	-0.241868	0.0226172
	P75546	RS12_MYCPN	30S ribosomal protein S12	-0.234769	0.0277304
	P75206	AMPA_MYCPN	Probable cytosol aminopeptidase	-0.232747	0.0290081
	P75247	CLPB_MYCPN	Chaperone protein clpB	-0.230728	0.0303411
	P75053	DEOD_MYCPN	Purine nucleoside phosphorylase deoD-type	-0.228711	0.031731
	P75364	Y423_MYCPN	Uncharacterized protein MG296 homolog	-0.222679	0.0373267
	P75102	Y011_MYCPN	Uncharacterized lipoprotein MPN_011	-0.222679	0.0373267
	P75527	DEF_MYCPN	Peptide deformylase	0.209314	0.0488869
	P75401	Y381_MYCPN	Uncharacterized protein MG263 homolog; Uncharacterized protein MPN_427; Uncharacterized protein MG265 homolog	0.212286	0.0450707
	P75393	DLDH_MYCPN	Dihydrolipoyl dehydrogenase	0.213769	0.0434661
	P75454	TIG_MYCPN	Trigger factor	0.213769	0.0434661
	P75250	IPYR_MYCPN	Inorganic pyrophosphatase	0.216731	0.0404121
	P78018	PGK_MYCPN	Phosphoglycerate kinase	0.21821	0.0389599
	P75396	Y386_MYCPN	Uncharacterized protein MG268 homolog	0.21821	0.0389599
	P75170	Y625_MYCPN	Uncharacterized protein MG427 homolog	0.225582	0.032069
	P75442	Y336_MYCPN	Uncharacterized protein MG240 homolog	0.227052	0.0312094
	P75552	OPPD_MYCPN	Oligopeptide transport ATP-binding protein oppD	0.228521	0.0303411
	P78034	PTH_MYCPN	Peptidyl-tRNA hydrolase	0.231453	0.0281928
	P75545	RS7_MYCPN	30S ribosomal protein S7	0.234379	0.0261546
	P75392	ODP2_MYCPN	Dihydrolipoyllysine-residue acetyltransferase component of pyruvate dehydrogenase complex	0.23584	0.0251885
	P75453	Y109_MYCPN	Uncharacterized protein MPN_109	0.240214	0.0222362
	P75509	Y266_MYCPN	Uncharacterized protein MG127 homolog	0.246026	0.0184384
	P75482	Y295_MYCPN	Uncharacterized protein MG210.1 homolog	0.257579	0.0125657
	P75359	PTA_MYCPN	Phosphate acetyltransferase	0.259017	0.0120734
	P75258	SYI_MYCPN	Isoleucyl-tRNA synthetase	0.273315	0.00721263
	P75512	THIO_MYCPN	Thioredoxin	0.278995	0.00595321
	P75298	CSD_MYCPN	Probable cysteine desulfurase	0.284652	0.00502797
	P75553	OPPC_MYCPN	Oligopeptide transport system permease protein oppC	0.290288	0.00411391
	P75402	FPG_MYCPN	Formamidopyrimidine-DNA glycosylase	0.293098	0.00384763
	P75504	YHIT_MYCPN	Uncharacterized 16.1 kDa HIT-like protein	0.295902	0.0034853
	P75295	Y491_MYCPN	Uncharacterized protein MPN_491	0.2987	0.00317756
	Q59547	RL17_MYCPN	50S ribosomal protein L17	0.2987	0.00317756
	P75466	Y071_MYCPN	S-adenosyl-L-methionine-dependent methyltransferase mraW; UPF0011 protein MG056 homolog	0.2987	0.00317756
	P75508	PPNK_MYCPN	Probable inorganic polyphosphate/ATP-NAD kinase	0.300098	0.00315867
	P75123	OHRL_MYCPN	Organic hydroperoxide resistance protein-like	0.300098	0.00315867
	P75360	Y381_MYCPN	Uncharacterized protein MG263 homolog; Uncharacterized protein MPN_427; Uncharacterized protein MG265 homolog	0.305673	0.00267001
	P75478	SCPA_MYCPN	Segregation and condensation protein A	0.307064	0.0025606
	Q59549	DNAA_MYCPN	Chromosomal replication initiator protein dnaA	0.311227	0.0021857
	P75543	RS6_MYCPN	30S ribosomal protein S6	0.323647	0.00134909
	P75420	RF1_MYCPN	Peptide chain release factor 1	0.32502	0.00129274
	P75429	Y349_MYCPN	Uncharacterized protein MG246 homolog	0.331867	0.000989726
	P75394	LPLA_MYCPN	Probable lipoate-protein ligase A	0.338682	0.000755616
	P75404	DPO3A_MYCPN	Uncharacterized protein MG010 homolog; DNA primase; DNA polymerase III subunit alpha	0.341399	0.000680388
	P75405	Y376_MYCPN	Uncharacterized protein MPN_376	0.341399	0.000680388
	P75223	Y555_MYCPN	Uncharacterized protein MG377 homolog	0.352216	0.000428274
	P75109	Y684_MYCPN	Uncharacterized ABC transporter permease MG468 homolog	0.361614	0.000297513
	P75409	CARDS_MYCPN	ADP-ribosylating toxin CARDS	0.364289	0.000267233
	P78003	METK_MYCPN	S-adenosylmethionine synthetase	0.364956	0.000264586
	P75564	SYFA_MYCPN	Phenylalanyl-tRNA synthetase alpha chain	0.389449	8.53721e-05
	P75534	GATA_MYCPN	Glutamyl-tRNA(Gln) amidotransferase subunit A	0.395997	6.23108e-05
	P75376	Y408_MYCPN	Uncharacterized lipoprotein MPN_408	0.399913	5.34591e-05
	P75528	Y244_MYCPN	Uncharacterized protein MG105 homolog	0.402517	4.78637e-05
	Q50288	Y200_MYCPN	Uncharacterized lipoprotein MPN_200	0.409007	3.47835e-05
	P75391	ODPB_MYCPN	Pyruvate dehydrogenase E1 component subunit beta	0.41933	2.03895e-05
	P75483	Y294_MYCPN	Uncharacterized protein MPN_294	0.433405	9.54736e-06
	P75526	KGUA_MYCPN	Guanylate kinase	0.45865	2.32556e-06
	P75118	Y673_MYCPN	Uncharacterized protein MG459 homolog	0.469867	1.35232e-06
	P75467	MRAZ_MYCPN	Protein mraZ	0.469867	1.35232e-06
	P75457	END4_MYCPN	Probable endonuclease 4	0.528264	3.74906e-08
	Q50313	DPO3B_MYCPN	DNA polymerase III subunit beta	0.567084	3.09758e-09
	P75399	Y381_MYCPN	Uncharacterized protein MG263 homolog; Uncharacterized protein MPN_427; Uncharacterized protein MG265 homolog	0.613902	1.48952e-10

## Sheet: iTraq8
	Supplementary Table ST2C: List of proteins with significant changes in abundance (itraq 8-plex)
	Label Set 1 (113, 115, 117) - LDH vs WT (n=3)
	Uniprot Accession	Uniprot ID	Description	Fold Change (log2(LDH/WT))	Adjusted p-value
	P75070	KITH_MYCPN	Thymidine kinase	-2.0216	0
	P78028	DYR_MYCPN	Dihydrofolate reductase	-1.289	0
	P78007	LDH_MYCPN	L-lactate dehydrogenase	-1.24841	0
	P78029	TYSY_MYCPN	Thymidylate synthase	-1.11637	0
	P78027	RIR1_MYCPN	Ribonucleoside-diphosphate reductase subunit alpha	-1.09495	0
	P75461	RIR2_MYCPN	Ribonucleoside-diphosphate reductase subunit beta	-1.02627	0
	P75460	NRDI_MYCPN	Protein nrdI	-0.981738	0
	Q50288	Y200_MYCPN	Uncharacterized lipoprotein MPN_200	-0.931216	4.90243e-14
	P75081	UPP_MYCPN	Uracil phosphoribosyltransferase	-0.722868	1.15777e-08
	Q50330	ATPG_MYCPN	ATP synthase gamma chain	-0.718451	1.39681e-08
	Q50327	ATPF_MYCPN	ATP synthase subunit b	-0.683596	7.85288e-08
	P78012	CH60_MYCPN	60 kDa chaperonin	-0.660415	2.40341e-07
	P75177	DPO3X_MYCPN	DNA polymerase III subunit gamma/tau	-0.657996	2.59872e-07
	P75349	Y126_MYCPN	Putative metallophosphoesterase MG207 homolog	-0.639985	5.75982e-07
	P75062	Y052_MYCPN	Uncharacterized lipoprotein MG040 homolog	-0.634031	7.37456e-07
	P75329	Y454_MYCPN	Uncharacterized protein MG319 homolog	-0.61984	1.29593e-06
	P75206	AMPA_MYCPN	Probable cytosol aminopeptidase	-0.618664	1.3258e-06
	P75215	OBG_MYCPN	MPN563	-0.563868	1.30195e-05
	P75039	PTF3A_MYCPN	PTS system fructose-specific EIIABC component	-0.563302	1.30195e-05
	Q50294	CBIO1_MYCPN	Putative ABC transporter ATP-binding protein MG304 homolog; Cobalt import ATP-binding protein cbiO 2; Cobalt import ATP-binding protein cbiO 1	-0.549787	2.18032e-05
	P75387	Y396_MYCPN	Uncharacterized protein MG277 homolog	-0.548666	2.22823e-05
	P75510	SYW_MYCPN	Tryptophanyl-tRNA synthetase	-0.508896	0.000104282
	P78011	GLYA_MYCPN	Serine hydroxymethyltransferase	-0.48834	0.000212444
	P75052	TYPH_MYCPN	Thymidine phosphorylase	-0.486193	0.000225166
	Q59547	RL17_MYCPN	50S ribosomal protein L17	-0.479771	0.000273565
	P75053	DEOD_MYCPN	Purine nucleoside phosphorylase deoD-type	-0.464898	0.000449447
	Q50332	ATPE_MYCPN	ATP synthase epsilon chain	-0.45227	0.000686806
	P75094	Y019_MYCPN	Putative ABC transporter ATP-binding protein MG015 homolog	-0.439752	0.000996935
	P75404	DPO3A_MYCPN	Uncharacterized protein MG010 homolog; DNA primase; DNA polymerase III subunit alpha	-0.43664	0.00108745
	P75059	POTA_MYCPN	Spermidine/putrescine import ATP-binding protein potA	-0.431467	0.00127001
	P75538	Y233_MYCPN	Uncharacterized lipoprotein MG095 homolog	-0.419639	0.00184049
	P75115	Y677_MYCPN	Uncharacterized protein MG461 homolog	-0.39476	0.00390309
	P75063	Y051_MYCPN	Uncharacterized protein MG039 homolog	-0.384728	0.00520737
	P75129	MSRB_MYCPN	Peptide methionine sulfoxide reductase msrB	-0.375758	0.00658342
	Q50316	Y685_MYCPN	Putative ABC transporter ATP-binding protein MG468.1 homolog	-0.374764	0.00667257
	Q50329	ATPA_MYCPN	ATP synthase subunit alpha	-0.361914	0.00952792
	P75486	Y291_MYCPN	Uncharacterized protein MG208 homolog	-0.357983	0.0103336
	P75519	Y255_MYCPN	Uncharacterized protein MG116 homolog	-0.356021	0.0107598
	P75056	Y058_MYCPN	Uncharacterized lipoprotein MG045 homolog	-0.353084	0.0115126
	P75144	MGP1_MYCPN	Mgp-operon protein 1	-0.352106	0.0116615
	P75248	Y530_MYCPN	Uncharacterized protein MG354 homolog	-0.34528	0.0135002
	P75107	SYS_MYCPN	Seryl-tRNA synthetase	-0.343336	0.0140438
	P75098	Y015_MYCPN	Uncharacterized protein MG011 homolog	-0.335585	0.0166353
	P09924	DEOC_MYCPN	Deoxyribose-phosphate aldolase	-0.321163	0.0239727
	P75061	PTHP_MYCPN	Phosphocarrier protein HPr	-0.309253	0.0308303
	P75054	SRP54_MYCPN	Signal recognition particle protein	-0.308779	0.0308303
	P75228	THII_MYCPN	Probable thiamine biosynthesis protein thiI	-0.289932	0.0454474
	P75050	MANB_MYCPN	Phosphomannomutase	0.280288	0.0478331
	P46775	RS4_MYCPN	30S ribosomal protein S4	0.280918	0.047649
	Q50297	RS13_MYCPN	30S ribosomal protein S13	0.282493	0.0464261
	P75176	UVRA_MYCPN	UvrABC system protein A	0.284066	0.0454474
	P75402	FPG_MYCPN	Formamidopyrimidine-DNA glycosylase	0.28658	0.0435914
	Q50365	HMW1_MYCPN	Cytadherence high molecular weight protein 1	0.297213	0.0340928
	P75581	RS10_MYCPN	30S ribosomal protein S10	0.298459	0.0334529
	P75477	SCPB_MYCPN	Segregation and condensation protein B	0.301569	0.0313444
	P78024	IF3_MYCPN	Translation initiation factor IF-3	0.304362	0.0303182
	Q50295	RPOA_MYCPN	DNA-directed RNA polymerase subunit alpha	0.308387	0.0277403
	P75454	TIG_MYCPN	Trigger factor	0.309624	0.0272251
	P75586	Y159_MYCPN	UPF0053 protein MG146 homolog	0.32987	0.0166353
	P75090	RPOE_MYCPN	Probable DNA-directed RNA polymerase subunit delta	0.33595	0.0143638
	Q9EXD4	Y388_MYCPN	Uncharacterized protein MG269.1 homolog	0.339585	0.0135002
	P75508	PPNK_MYCPN	Probable inorganic polyphosphate/ATP-NAD kinase	0.343815	0.0122303
	P75225	SYT_MYCPN	Threonyl-tRNA synthetase	0.354036	0.00988004
	P75542	SSB_MYCPN	Single-stranded DNA-binding protein	0.377215	0.00535089
	P75295	Y491_MYCPN	Uncharacterized protein MPN_491	0.389543	0.00386718
	P75239	RL7_MYCPN	50S ribosomal protein L7/L12	0.433867	0.000996935
	P75389	NAOX_MYCPN	Probable NADH oxidase	0.443472	0.000740701
	P75541	RS18_MYCPN	30S ribosomal protein S18	0.45971	0.000444367
	P78025	LON_MYCPN	ATP-dependent protease La	0.478518	0.000234003
	P75540	RL9_MYCPN	50S ribosomal protein L9	0.482361	0.000212444
	P75577	RL2_MYCPN	50S ribosomal protein L2	0.482909	0.000212444
	P75092	PIP_MYCPN	Putative proline iminopeptidase	0.52183	5.06257e-05
	P75211	P200_MYCPN	Protein P200	0.54773	1.89281e-05
	Q9EXD8	ULAB_MYCPN	Ascorbate-specific phosphotransferase enzyme IIB component	0.563878	1.03529e-05
	P75356	Y432_MYCPN	Putative ABC transporter ATP-binding protein MG303 homolog	0.577028	6.02198e-06
	P75405	Y376_MYCPN	Uncharacterized protein MPN_376	0.591584	3.25186e-06
	Q50360	HMW3_MYCPN	Cytadherence high molecular weight protein 3	0.606246	1.72307e-06
	P78032	TOP1_MYCPN	DNA topoisomerase 1	0.617271	1.1382e-06
	Q50301	RS5_MYCPN	30S ribosomal protein S5	0.623	9.00255e-07
	P75579	RL4_MYCPN	50S ribosomal protein L4	0.645938	3.34964e-07
	P75479	PLSC_MYCPN	Probable 1-acyl-sn-glycerol-3-phosphate acyltransferase	0.696429	3.09754e-08
	P75554	OPPB_MYCPN	Oligopeptide transport system permease protein oppB	0.716839	1.15777e-08
	P75545	RS7_MYCPN	30S ribosomal protein S7	0.725433	8.07214e-09
	P75509	Y266_MYCPN	Uncharacterized protein MG127 homolog	0.783975	3.14733e-10
	Q50314	PARA_MYCPN	ParA family protein MPN_688	0.82129	3.58847e-11
	P78035	RL1_MYCPN	50S ribosomal protein L1	0.861884	3.01574e-12
	P75481	Y297_MYCPN	Uncharacterized protein MG211 homolog	0.941792	1.43987e-14
	P75409	CARDS_MYCPN	ADP-ribosylating toxin CARDS	0.965123	5.19954e-15
	P75511	Y264_MYCPN	Uncharacterized protein MG125 homolog	1.12253	0
	P75205	CH10_MYCPN	10 kDa chaperonin	1.20788	0
	P75512	THIO_MYCPN	Thioredoxin	1.25773	0
	P75353	Y121_MYCPN	Uncharacterized protein MG202 homolog	1.28344	0
	Label Set 2 (114, 116, 118) - LDH vs WT (n=3)
	Uniprot Accession	Uniprot ID	Description	Fold Change (log2(LDH/WT))	Adjusted p-value
	P75070	KITH_MYCPN	Thymidine kinase	-1.85724	0
	P78029	TYSY_MYCPN	Thymidylate synthase	-1.35727	0
	P78028	DYR_MYCPN	Dihydrofolate reductase	-1.33274	0
	P78027	RIR1_MYCPN	Ribonucleoside-diphosphate reductase subunit alpha	-1.23683	0
	P75460	NRDI_MYCPN	Protein nrdI	-1.13054	0
	P75177	DPO3X_MYCPN	DNA polymerase III subunit gamma/tau	-1.02397	0
	P75461	RIR2_MYCPN	Ribonucleoside-diphosphate reductase subunit beta	-0.973501	2.07982e-14
	P78007	LDH_MYCPN	L-lactate dehydrogenase	-0.876204	7.72444e-12
	P75329	Y454_MYCPN	Uncharacterized protein MG319 homolog	-0.845177	4.62421e-11
	Q50315	Y687_MYCPN	Uncharacterized protein MPN_687	-0.825295	1.38141e-10
	Q50288	Y200_MYCPN	Uncharacterized lipoprotein MPN_200	-0.796623	6.24172e-10
	P75129	MSRB_MYCPN	Peptide methionine sulfoxide reductase msrB	-0.78122	1.31778e-09
	Q50330	ATPG_MYCPN	ATP synthase gamma chain	-0.696915	9.40791e-08
	P75081	UPP_MYCPN	Uracil phosphoribosyltransferase	-0.692106	1.13983e-07
	P75062	Y052_MYCPN	Uncharacterized lipoprotein MG040 homolog	-0.651864	7.0502e-07
	P75206	AMPA_MYCPN	Probable cytosol aminopeptidase	-0.643717	9.34776e-07
	Q50327	ATPF_MYCPN	ATP synthase subunit b	-0.637925	1.1147e-06
	P75349	Y126_MYCPN	Putative metallophosphoesterase MG207 homolog	-0.607046	4.20306e-06
	P75098	Y015_MYCPN	Uncharacterized protein MG011 homolog	-0.601963	5.06691e-06
	P75510	SYW_MYCPN	Tryptophanyl-tRNA synthetase	-0.551551	3.67128e-05
	Q50316	Y685_MYCPN	Putative ABC transporter ATP-binding protein MG468.1 homolog	-0.543949	4.68236e-05
	P75053	DEOD_MYCPN	Purine nucleoside phosphorylase deoD-type	-0.529937	7.25658e-05
	P75069	SYH_MYCPN	Histidyl-tRNA synthetase	-0.472116	0.000533469
	P75215	OBG_MYCPN	MPN563	-0.465947	0.000643993
	Q50332	ATPE_MYCPN	ATP synthase epsilon chain	-0.451652	0.000994897
	P78012	CH60_MYCPN	60 kDa chaperonin	-0.447594	0.00107077
	P75351	HRCA_MYCPN	Heat-inducible transcription repressor hrcA	-0.437498	0.00142862
	P75457	END4_MYCPN	Probable endonuclease 4	-0.429472	0.00171568
	P75522	RPE_MYCPN	Probable ribulose-phosphate 3-epimerase	-0.426474	0.0018529
	Q50293	CBIO1_MYCPN	Putative ABC transporter ATP-binding protein MG304 homolog; Cobalt import ATP-binding protein cbiO 2; Cobalt import ATP-binding protein cbiO 1	-0.417516	0.00233269
	P75039	PTF3A_MYCPN	PTS system fructose-specific EIIABC component	-0.416524	0.00233269
	Q50294	CBIO1_MYCPN	Putative ABC transporter ATP-binding protein MG304 homolog; Cobalt import ATP-binding protein cbiO 2; Cobalt import ATP-binding protein cbiO 1	-0.407628	0.00290807
	P75123	OHRL_MYCPN	Organic hydroperoxide resistance protein-like	-0.407628	0.00290807
	P75127	Y664_MYCPN	UPF0230 protein MG450 homolog; UPF0230 protein MG326 homolog	-0.398786	0.00367439
	P75221	MNMG_MYCPN	tRNA uridine 5-carboxymethylaminomethyl modification enzyme mnmG	-0.396339	0.00383738
	P75179	RS9_MYCPN	30S ribosomal protein S9	-0.388052	0.00481524
	P78011	GLYA_MYCPN	Serine hydroxymethyltransferase	-0.373543	0.00706961
	Q50329	ATPA_MYCPN	ATP synthase subunit alpha	-0.368739	0.00776287
	P75404	DPO3A_MYCPN	Uncharacterized protein MG010 homolog; DNA primase; DNA polymerase III subunit alpha	-0.368739	0.00776287
	P75094	Y019_MYCPN	Putative ABC transporter ATP-binding protein MG015 homolog	-0.362995	0.00874582
	P75063	Y051_MYCPN	Uncharacterized protein MG039 homolog	-0.362995	0.00874582
	P75080	DPO3_MYCPN	DNA polymerase III polC-type	-0.36204	0.00886519
	P75061	PTHP_MYCPN	Phosphocarrier protein HPr	-0.325275	0.0212342
	P75107	SYS_MYCPN	Seryl-tRNA synthetase	-0.320629	0.0230332
	P75396	Y386_MYCPN	Uncharacterized protein MG268 homolog	-0.320629	0.0230332
	P75399	Y381_MYCPN	Uncharacterized protein MG263 homolog; Uncharacterized protein MPN_427; Uncharacterized protein MG265 homolog	-0.314149	0.0261127
	P75068	SYD_MYCPN	Aspartyl-tRNA synthetase	-0.312303	0.0267594
	P75056	Y058_MYCPN	Uncharacterized lipoprotein MG045 homolog	-0.308618	0.0280301
	P75538	Y233_MYCPN	Uncharacterized lipoprotein MG095 homolog	-0.308618	0.0280301
	P75115	Y677_MYCPN	Uncharacterized protein MG461 homolog	-0.301276	0.0323618
	P75122	SYY_MYCPN	Tyrosyl-tRNA synthetase	-0.295794	0.0357111
	P75486	Y291_MYCPN	Uncharacterized protein MG208 homolog	-0.292605	0.0373627
	P75225	SYT_MYCPN	Threonyl-tRNA synthetase	0.290992	0.0460188
	Q9EXC9	Y254_MYCPN	Protein MG115 homolog	0.299467	0.0383819
	P75368	SYA_MYCPN	Alanyl-tRNA synthetase	0.301277	0.0373627
	P75308	KCY_MYCPN	Cytidylate kinase	0.303386	0.0360775
	P75527	DEF_MYCPN	Peptide deformylase	0.30489	0.035513
	P75586	Y159_MYCPN	UPF0053 protein MG146 homolog	0.30489	0.035513
	Q9EXD3	Y377_MYCPN	Uncharacterized protein MPN_377	0.313882	0.0296335
	P75529	RNR_MYCPN	Ribonuclease R	0.315674	0.0286835
	P75580	RL3_MYCPN	50S ribosomal protein L3	0.319846	0.0267594
	P78024	IF3_MYCPN	Translation initiation factor IF-3	0.320144	0.0267594
	P75467	MRAZ_MYCPN	Protein mraZ	0.320442	0.0267594
	P75453	Y109_MYCPN	Uncharacterized protein MPN_109	0.325193	0.0247804
	P75518	Y256_MYCPN	Uncharacterized protein MG117 homolog	0.325786	0.0246908
	P75167	GPMI_MYCPN	2,3-bisphosphoglycerate-independent phosphoglycerate mutase	0.331111	0.0223975
	P78032	TOP1_MYCPN	DNA topoisomerase 1	0.339355	0.0186516
	P75382	SYP_MYCPN	Prolyl-tRNA synthetase	0.345215	0.0162594
	Q9EXD4	Y388_MYCPN	Uncharacterized protein MG269.1 homolog	0.346384	0.0159653
	P75403	EX53_MYCPN	5'-3' exonuclease	0.354541	0.0130775
	P75446	Y118_MYCPN	Uncharacterized protein MG199 homolog	0.364962	0.0100422
	P53527	RPIB_MYCPN	Probable ribose-5-phosphate isomerase B	0.366691	0.00970299
	P75588	Y157_MYCPN	Uncharacterized protein MG144 homolog	0.374735	0.00819717
	P75388	APT_MYCPN	Adenine phosphoribosyltransferase	0.378169	0.00775569
	P75228	THII_MYCPN	Probable thiamine biosynthesis protein thiI	0.387569	0.00612693
	Q50365	HMW1_MYCPN	Cytadherence high molecular weight protein 1	0.405908	0.00376565
	P75090	RPOE_MYCPN	Probable DNA-directed RNA polymerase subunit delta	0.413737	0.00307309
	P75551	OPPF_MYCPN	Oligopeptide transport ATP-binding protein oppF	0.424294	0.00233604
	P75092	PIP_MYCPN	Putative proline iminopeptidase	0.424847	0.00233269
	P75327	Y456_MYCPN	Uncharacterized lipoprotein MG321 homolog	0.424847	0.00233269
	P75176	UVRA_MYCPN	UvrABC system protein A	0.428716	0.00220917
	P78025	LON_MYCPN	ATP-dependent protease La	0.438068	0.00171568
	P75581	RS10_MYCPN	30S ribosomal protein S10	0.439712	0.00167916
	P75466	Y071_MYCPN	S-adenosyl-L-methionine-dependent methyltransferase mraW; UPF0011 protein MG056 homolog	0.442448	0.00156782
	P75477	SCPB_MYCPN	Segregation and condensation protein B	0.451712	0.00120907
	P75470	Y311_MYCPN	Uncharacterized protein MG218.1 homolog	0.456592	0.00107077
	P75552	OPPD_MYCPN	Oligopeptide transport ATP-binding protein oppD	0.456592	0.00107077
	P75239	RL7_MYCPN	50S ribosomal protein L7/L12	0.470063	0.00072947
	P46775	RS4_MYCPN	30S ribosomal protein S4	0.502413	0.000254302
	Q59549	DNAA_MYCPN	Chromosomal replication initiator protein dnaA	0.514425	0.000168766
	P75577	RL2_MYCPN	50S ribosomal protein L2	0.524014	0.00012145
	Q50360	HMW3_MYCPN	Cytadherence high molecular weight protein 3	0.543259	6.17248e-05
	P75389	NAOX_MYCPN	Probable NADH oxidase	0.544278	6.08456e-05
	P75409	CARDS_MYCPN	ADP-ribosylating toxin CARDS	0.545297	6.0014e-05
	P75540	RL9_MYCPN	50S ribosomal protein L9	0.556958	4.0244e-05
	P78035	RL1_MYCPN	50S ribosomal protein L1	0.586448	1.30294e-05
	P75211	P200_MYCPN	Protein P200	0.588919	1.21149e-05
	P75405	Y376_MYCPN	Uncharacterized protein MPN_376	0.647003	1.1147e-06
	P75579	RL4_MYCPN	50S ribosomal protein L4	0.651739	9.34776e-07
	P75145	PTMA_MYCPN	Mannitol-specific phosphotransferase enzyme IIA component	0.656695	8.01144e-07
	P75545	RS7_MYCPN	30S ribosomal protein S7	0.685851	2.21945e-07
	P75509	Y266_MYCPN	Uncharacterized protein MG127 homolog	0.760544	5.97978e-09
	Q50314	PARA_MYCPN	ParA family protein MPN_688	0.798199	8.66888e-10
	Q50301	RS5_MYCPN	30S ribosomal protein S5	0.831351	1.49615e-10
	P75479	PLSC_MYCPN	Probable 1-acyl-sn-glycerol-3-phosphate acyltransferase	0.884631	7.72444e-12
	P75205	CH10_MYCPN	10 kDa chaperonin	0.952806	1.19989e-13
	P75353	Y121_MYCPN	Uncharacterized protein MG202 homolog	0.999257	5.67223e-15
	P75512	THIO_MYCPN	Thioredoxin	1.02869	0
	P75511	Y264_MYCPN	Uncharacterized protein MG125 homolog	1.07173	0
	P75554	OPPB_MYCPN	Oligopeptide transport system permease protein oppB	1.30052	0
	P75481	Y297_MYCPN	Uncharacterized protein MG211 homolog	1.40843	0
	Label Set 1 (113, 115, 117) - PrkC vs WT (n=3)
	Uniprot Accession	Uniprot ID	Description	Fold Change (log2(PrkC/WT))	Adjusted p-value
	P75070	KITH_MYCPN	Thymidine kinase	-1.01999	0
	P75246	Y532_MYCPN	Uncharacterized protein MG356 homolog	-0.996695	0
	P75461	RIR2_MYCPN	Ribonucleoside-diphosphate reductase subunit beta	-0.967284	2.07982e-14
	P75518	Y256_MYCPN	Uncharacterized protein MG117 homolog	-0.870339	9.70235e-12
	P75460	NRDI_MYCPN	Protein nrdI	-0.861294	1.38266e-11
	P75205	CH10_MYCPN	10 kDa chaperonin	-0.631193	2.95184e-06
	P78027	RIR1_MYCPN	Ribonucleoside-diphosphate reductase subunit alpha	-0.618437	4.76365e-06
	P78028	DYR_MYCPN	Dihydrofolate reductase	-0.58579	1.87222e-05
	Q50327	ATPF_MYCPN	ATP synthase subunit b	-0.534565	0.000135534
	P78029	TYSY_MYCPN	Thymidylate synthase	-0.52978	0.000151673
	P75056	Y058_MYCPN	Uncharacterized lipoprotein MG045 homolog	-0.517886	0.000225717
	Q50360	HMW3_MYCPN	Cytadherence high molecular weight protein 3	-0.489735	0.000618519
	P75231	Y547_MYCPN	Uncharacterized protein MG369 homolog	-0.457572	0.00185546
	Q50341	MGP3_MYCPN	Mgp-operon protein 3	-0.437267	0.00313818
	P75240	RL10_MYCPN	50S ribosomal protein L10	-0.432794	0.00346312
	P75588	Y157_MYCPN	Uncharacterized protein MG144 homolog	-0.406241	0.00655339
	P75174	Y621_MYCPN	Uncharacterized protein MG423 homolog	-0.40405	0.00675064
	P75215	OBG_MYCPN	MPN563	-0.401862	0.00696111
	P75308	KCY_MYCPN	Cytidylate kinase	-0.397497	0.0071748
	P78012	CH60_MYCPN	60 kDa chaperonin	-0.378015	0.0117583
	P75167	GPMI_MYCPN	2,3-bisphosphoglycerate-independent phosphoglycerate mutase	-0.373722	0.0129501
	P75470	Y311_MYCPN	Uncharacterized protein MG218.1 homolog	-0.367305	0.0147999
	P75210	ERA_MYCPN	GTP-binding protein era homolog	-0.358793	0.0173506
	P75395	Y387_MYCPN	Uncharacterized protein MG269 homolog	-0.352443	0.0197244
	P75069	SYH_MYCPN	Histidyl-tRNA synthetase	-0.348224	0.0211388
	Q50332	ATPE_MYCPN	ATP synthase epsilon chain	-0.339824	0.025979
	P75121	Y670_MYCPN	Uncharacterized protein MG456 homolog	-0.333556	0.0300459
	P75221	MNMG_MYCPN	tRNA uridine 5-carboxymethylaminomethyl modification enzyme mnmG	-0.326278	0.0348449
	P75426	DPO3A_MYCPN	Uncharacterized protein MG010 homolog; DNA primase; DNA polymerase III subunit alpha	-0.323169	0.036234
	P75580	RL3_MYCPN	50S ribosomal protein L3	-0.321101	0.0374566
	P75354	DNAJM_MYCPN	DnaJ-like protein MG200 homolog	-0.306705	0.0498937
	P75039	PTF3A_MYCPN	PTS system fructose-specific EIIABC component	-0.298543	0.0577365
	P75061	PTHP_MYCPN	Phosphocarrier protein HPr	-0.287394	0.0715722
	P75388	APT_MYCPN	Adenine phosphoribosyltransferase	-0.286385	0.0720861
	P75471	HMW2_MYCPN	Cytadherence high molecular weight protein 2	-0.282355	0.077906
	P75538	Y233_MYCPN	Uncharacterized lipoprotein MG095 homolog	-0.274329	0.0921426
	P75516	Y258_MYCPN	Putative carbohydrate transport ATP-binding protein MPN_258	-0.270332	0.0962331
	P75554	OPPB_MYCPN	Oligopeptide transport system permease protein oppB	-0.268338	0.0962371
	Q50329	ATPA_MYCPN	ATP synthase subunit alpha	-0.268338	0.0962371
	P75404	DPO3A_MYCPN	Uncharacterized protein MG010 homolog; DNA primase; DNA polymerase III subunit alpha	-0.268338	0.0962371
	P75486	Y291_MYCPN	Uncharacterized protein MG208 homolog	-0.267342	0.0969846
	Q50365	HMW1_MYCPN	Cytadherence high molecular weight protein 1	-0.262373	0.105195
	P75053	DEOD_MYCPN	Purine nucleoside phosphorylase deoD-type	-0.262373	0.105195
	P75581	RS10_MYCPN	30S ribosomal protein S10	-0.252484	0.123309
	P75168	PT1_MYCPN	Phosphoenolpyruvate-protein phosphotransferase	-0.252484	0.123309
	P75403	EX53_MYCPN	5'-3' exonuclease	-0.243643	0.146445
	P75517	GALE_MYCPN	UDP-glucose 4-epimerase	-0.240707	0.151999
	P75528	Y244_MYCPN	Uncharacterized protein MG105 homolog	-0.23973	0.151999
	Q50294	CBIO1_MYCPN	Putative ABC transporter ATP-binding protein MG304 homolog; Cobalt import ATP-binding protein cbiO 2; Cobalt import ATP-binding protein cbiO 1	-0.238754	0.151999
	P75438	Y340_MYCPN	Probable DNA helicase MPN_340	0.231816	0.152856
	P75482	Y295_MYCPN	Uncharacterized protein MG210.1 homolog	0.233224	0.151999
	P75394	LPLA_MYCPN	Probable lipoate-protein ligase A	0.233224	0.151999
	P75390	ODPA_MYCPN	Pyruvate dehydrogenase E1 component subunit alpha	0.247231	0.123309
	P75228	THII_MYCPN	Probable thiamine biosynthesis protein thiI	0.254877	0.107045
	P75569	PTG3C_MYCPN	PTS system glucose-specific EIICBA component	0.265239	0.0956122
	P75508	PPNK_MYCPN	Probable inorganic polyphosphate/ATP-NAD kinase	0.266615	0.0941476
	P75382	SYP_MYCPN	Prolyl-tRNA synthetase	0.281664	0.0715722
	P75476	K6PF_MYCPN	6-phosphofructokinase	0.284384	0.0688919
	P75361	P115_MYCPN	Protein P115 homolog	0.292512	0.0577365
	P75229	Y549_MYCPN	Uncharacterized protein MG371 homolog	0.29925	0.0507012
	P75455	Y330_MYCPN	Uncharacterized protein MG237 homolog	0.307295	0.0430438
	P75577	RL2_MYCPN	50S ribosomal protein L2	0.309966	0.0410026
	P78018	PGK_MYCPN	Phosphoglycerate kinase	0.312633	0.039059
	P75399	Y381_MYCPN	Uncharacterized protein MG263 homolog; Uncharacterized protein MPN_427; Uncharacterized protein MG265 homolog	0.319279	0.0349606
	P78034	PTH_MYCPN	Peptidyl-tRNA hydrolase	0.324573	0.031755
	P75479	PLSC_MYCPN	Probable 1-acyl-sn-glycerol-3-phosphate acyltransferase	0.344255	0.0204247
	P75442	Y336_MYCPN	Uncharacterized protein MG240 homolog	0.349459	0.0185495
	P75312	Y664_MYCPN	UPF0230 protein MG450 homolog; UPF0230 protein MG326 homolog	0.354644	0.0168668
	P75295	Y491_MYCPN	Uncharacterized protein MPN_491	0.355937	0.0166968
	P75110	Y683_MYCPN	Putative ABC transporter ATP-binding protein MG467 homolog	0.361099	0.0147999
	P75548	HPRK_MYCPN	HPr kinase/phosphorylase	0.372645	0.0117583
	P75457	END4_MYCPN	Probable endonuclease 4	0.384101	0.00869391
	P75389	NAOX_MYCPN	Probable NADH oxidase	0.392948	0.00708215
	P75466	Y071_MYCPN	S-adenosyl-L-methionine-dependent methyltransferase mraW; UPF0011 protein MG056 homolog	0.394207	0.00705368
	P75252	Y526_MYCPN	Uncharacterized protein MG350 homolog	0.405493	0.00576792
	P75405	Y376_MYCPN	Uncharacterized protein MPN_376	0.407989	0.00555719
	P75467	MRAZ_MYCPN	Protein mraZ	0.415451	0.0045653
	P75586	Y159_MYCPN	UPF0053 protein MG146 homolog	0.424108	0.00359857
	P75391	ODPB_MYCPN	Pyruvate dehydrogenase E1 component subunit beta	0.44005	0.00245314
	P75223	Y555_MYCPN	Uncharacterized protein MG377 homolog	0.446135	0.00210605
	P75453	Y109_MYCPN	Uncharacterized protein MPN_109	0.569438	2.66659e-05
	P75356	Y432_MYCPN	Putative ABC transporter ATP-binding protein MG303 homolog	0.647029	1.17972e-06
	Q50313	DPO3B_MYCPN	DNA polymerase III subunit beta	0.698402	1.02434e-07
	Label Set 2 (114, 116, 118) - PrkC vs WT (n=3)
	Uniprot Accession	Uniprot ID	Description	Fold Change (log2(PrkC/WT))	Adjusted p-value
	P75460	NRDI_MYCPN	Protein nrdI	-1.12851	0
	P75246	Y532_MYCPN	Uncharacterized protein MG356 homolog	-0.937562	1.21669e-12
	P75070	KITH_MYCPN	Thymidine kinase	-0.856426	1.26806e-10
	P78029	TYSY_MYCPN	Thymidylate synthase	-0.790336	4.19786e-09
	P75461	RIR2_MYCPN	Ribonucleoside-diphosphate reductase subunit beta	-0.77961	6.0419e-09
	P78027	RIR1_MYCPN	Ribonucleoside-diphosphate reductase subunit alpha	-0.768963	8.95127e-09
	P78028	DYR_MYCPN	Dihydrofolate reductase	-0.6815	6.42677e-07
	P75205	CH10_MYCPN	10 kDa chaperonin	-0.679006	6.42677e-07
	P75329	Y454_MYCPN	Uncharacterized protein MG319 homolog	-0.552645	0.000105492
	P75395	Y387_MYCPN	Uncharacterized protein MG269 homolog	-0.52327	0.00027997
	Q50360	HMW3_MYCPN	Cytadherence high molecular weight protein 3	-0.487919	0.000834027
	P75039	PTF3A_MYCPN	PTS system fructose-specific EIIABC component	-0.479215	0.00106769
	P75560	RS2_MYCPN	30S ribosomal protein S2	-0.449158	0.00264534
	Q50365	HMW1_MYCPN	Cytadherence high molecular weight protein 1	-0.442798	0.00309823
	P75040	Y077_MYCPN	Uncharacterized protein MG061 homolog 2	-0.434361	0.00387541
	P78024	IF3_MYCPN	Translation initiation factor IF-3	-0.424928	0.00478024
	P75177	DPO3X_MYCPN	DNA polymerase III subunit gamma/tau	-0.405214	0.00775785
	P75167	GPMI_MYCPN	2,3-bisphosphoglycerate-independent phosphoglycerate mutase	-0.401098	0.00816462
	P75053	DEOD_MYCPN	Purine nucleoside phosphorylase deoD-type	-0.401098	0.00816462
	Q50327	ATPF_MYCPN	ATP synthase subunit b	-0.37261	0.0167791
	P22446	GYRA_MYCPN	DNA gyrase subunit A	-0.370596	0.0172065
	P75351	HRCA_MYCPN	Heat-inducible transcription repressor hrcA	-0.364572	0.0195669
	P75061	PTHP_MYCPN	Phosphocarrier protein HPr	-0.363571	0.0195669
	P75356	Y432_MYCPN	Putative ABC transporter ATP-binding protein MG303 homolog	-0.35658	0.0224898
	P78012	CH60_MYCPN	60 kDa chaperonin	-0.346651	0.0284924
	P75471	HMW2_MYCPN	Cytadherence high molecular weight protein 2	-0.342698	0.0285776
	P75516	Y258_MYCPN	Putative carbohydrate transport ATP-binding protein MPN_258	-0.342698	0.0285776
	Q50329	ATPA_MYCPN	ATP synthase subunit alpha	-0.342698	0.0285776
	P78035	RL1_MYCPN	50S ribosomal protein L1	-0.340726	0.0293753
	Q50341	MGP3_MYCPN	Mgp-operon protein 3	-0.315329	0.0486829
	P75446	Y118_MYCPN	Uncharacterized protein MG199 homolog	0.324727	0.0485597
	P75590	IF2_MYCPN	Translation initiation factor IF-2	0.32721	0.0466798
	P75387	Y396_MYCPN	Uncharacterized protein MG277 homolog	0.334634	0.0397075
	P75389	NAOX_MYCPN	Probable NADH oxidase	0.338331	0.0370012
	P75467	MRAZ_MYCPN	Protein mraZ	0.348146	0.0294761
	P75405	Y376_MYCPN	Uncharacterized protein MPN_376	0.353028	0.0285776
	P75382	SYP_MYCPN	Prolyl-tRNA synthetase	0.37119	0.0195669
	Q50288	Y200_MYCPN	Uncharacterized lipoprotein MPN_200	0.392688	0.0124751
	P75391	ODPB_MYCPN	Pyruvate dehydrogenase E1 component subunit beta	0.400962	0.0101545
	P75478	SCPA_MYCPN	Segregation and condensation protein A	0.415037	0.00773021
	P75401	Y381_MYCPN	Uncharacterized protein MG263 homolog; Uncharacterized protein MPN_427; Uncharacterized protein MG265 homolog	0.428977	0.0052595
	P75399	Y381_MYCPN	Uncharacterized protein MG263 homolog; Uncharacterized protein MPN_427; Uncharacterized protein MG265 homolog	0.439343	0.00413624
	P75252	Y526_MYCPN	Uncharacterized protein MG350 homolog	0.463247	0.00231255
	P75223	Y555_MYCPN	Uncharacterized protein MG377 homolog	0.500026	0.000778533
	P75228	THII_MYCPN	Probable thiamine biosynthesis protein thiI	0.510443	0.000571946
	Q50313	DPO3B_MYCPN	DNA polymerase III subunit beta	0.557202	0.000113449
	P75457	END4_MYCPN	Probable endonuclease 4	0.561427	0.000105492
	P75453	Y109_MYCPN	Uncharacterized protein MPN_109	0.570887	8.57498e-05
	P75145	PTMA_MYCPN	Mannitol-specific phosphotransferase enzyme IIA component	0.616265	1.44539e-05

## Sheet: mTraq
	Supplementary Table ST2D: List of proteins with significant changes in abundance (mtraq)
	Mix1 - LDH vs WT (n=3)
	Uniprot Accession	Uniprot ID	Description	Fold Change (log2(LDH/WT))	Adjusted p-value
	P78007	LDH_MYCPN	L-lactate dehydrogenase	-5.75656	0
	P75070	KITH_MYCPN	Thymidine kinase	-3.35739	0
	P75460	NRDI_MYCPN	Protein nrdI	-3.17762	3.83397e-14
	P78028	DYR_MYCPN	Dihydrofolate reductase	-3.01779	6.32605e-13
	P78027	RIR1_MYCPN	Ribonucleoside-diphosphate reductase subunit alpha	-2.06168	2.68762e-06
	P78029	TYSY_MYCPN	Thymidylate synthase	-2.04506	3.07681e-06
	P75109	Y684_MYCPN	Uncharacterized ABC transporter permease MG468 homolog	-1.68188	0.000200313
	P75538	Y233_MYCPN	Uncharacterized lipoprotein MG095 homolog	-1.63347	0.000311606
	P75206	AMPA_MYCPN	Probable cytosol aminopeptidase	-1.57069	0.000516198
	P78011	GLYA_MYCPN	Serine hydroxymethyltransferase	-1.48229	0.00108415
	P75461	RIR2_MYCPN	Ribonucleoside-diphosphate reductase subunit beta	-1.47115	0.00117425
	P75053	DEOD_MYCPN	Purine nucleoside phosphorylase deoD-type	-1.34547	0.00347572
	P75063	Y051_MYCPN	Uncharacterized protein MG039 homolog	-1.24086	0.00797531
	P75062	Y052_MYCPN	Uncharacterized lipoprotein MG040 homolog	-1.20658	0.0101994
	P75054	SRP54_MYCPN	Signal recognition particle protein	-1.19279	0.0109556
	Q50329	ATPA_MYCPN	ATP synthase subunit alpha	-1.17762	0.0116599
	P75123	OHRL_MYCPN	Organic hydroperoxide resistance protein-like	-1.13597	0.0149111
	P75052	TYPH_MYCPN	Thymidine phosphorylase	-1.12283	0.0162917
	P75177	DPO3X_MYCPN	DNA polymerase III subunit gamma/tau	-1.11848	0.0165626
	P75478	SCPA_MYCPN	Segregation and condensation protein A	-1.1091	0.0172252
	P75118	Y673_MYCPN	Uncharacterized protein MG459 homolog	-1.09264	0.0189749
	P75168	PT1_MYCPN	Phosphoenolpyruvate-protein phosphotransferase	-1.07708	0.0208606
	P78012	CH60_MYCPN	60 kDa chaperonin	-1.07426	0.0208606
	P75121	Y670_MYCPN	Uncharacterized protein MG456 homolog	-1.03136	0.0272884
	P75270	Y517_MYCPN	Uncharacterized protein MG342 homolog	-1.01914	0.0294842
	P75403	EX53_MYCPN	5'-3' exonuclease	-1.01509	0.0299397
	P75089	ALF_MYCPN	Fructose-bisphosphate aldolase	-0.973886	0.0378496
	P23568	EFTU_MYCPN	Elongation factor Tu	-0.958247	0.0417367
	P75161	RRF_MYCPN	Ribosome-recycling factor	1.02562	0.0431095
	P75364	Y423_MYCPN	Uncharacterized protein MG296 homolog	1.02906	0.0426365
	P75115	Y677_MYCPN	Uncharacterized protein MG461 homolog	1.04935	0.0378496
	Q50306	RL5_MYCPN	50S ribosomal protein L5	1.07285	0.0332367
	P75170	Y625_MYCPN	Uncharacterized protein MG427 homolog	1.08328	0.0312058
	P75409	CARDS_MYCPN	ADP-ribosylating toxin CARDS	1.11041	0.0270188
	P75225	SYT_MYCPN	Threonyl-tRNA synthetase	1.14491	0.0213505
	P78017	GRPE_MYCPN	Protein grpE	1.17063	0.0189626
	P75542	SSB_MYCPN	Single-stranded DNA-binding protein	1.18625	0.0172252
	Q9EXD4	Y388_MYCPN	Uncharacterized protein MG269.1 homolog	1.23042	0.0132785
	P75069	SYH_MYCPN	Histidyl-tRNA synthetase	1.24288	0.0122073
	P75440	Y338_MYCPN	Uncharacterized protein MG242 homolog	1.24457	0.0122073
	P75544	EFG_MYCPN	Elongation factor G	1.25439	0.0116599
	P75504	YHIT_MYCPN	Uncharacterized 16.1 kDa HIT-like protein	1.25886	0.0116271
	P75360	Y381_MYCPN	Uncharacterized protein MG263 homolog; Uncharacterized protein MPN_427; Uncharacterized protein MG265 homolog	1.27163	0.0109171
	P75512	THIO_MYCPN	Thioredoxin	1.31598	0.00797531
	P75508	PPNK_MYCPN	Probable inorganic polyphosphate/ATP-NAD kinase	1.40609	0.00389479
	P75525	PPH_MYCPN	Putative protein phosphatase	1.4231	0.00347572
	P75383	Y400_MYCPN	Uncharacterized protein MG281 homolog	1.50483	0.001683
	P75442	Y336_MYCPN	Uncharacterized protein MG240 homolog	1.56436	0.00105248
	P46775	RS4_MYCPN	30S ribosomal protein S4	1.57883	0.000939738
	P75405	Y376_MYCPN	Uncharacterized protein MPN_376	1.70021	0.000327403
	P75552	OPPD_MYCPN	Oligopeptide transport ATP-binding protein oppD	1.7141	0.000311082
	P75551	OPPF_MYCPN	Oligopeptide transport ATP-binding protein oppF	1.80683	0.00012742
	P75250	IPYR_MYCPN	Inorganic pyrophosphatase	1.89701	4.56188e-05
	P75510	SYW_MYCPN	Tryptophanyl-tRNA synthetase	2.05875	6.06245e-06
	P75295	Y491_MYCPN	Uncharacterized protein MPN_491	3.00856	2.67995e-12
	Mix2 - LDH vs WT (n=3)
	Uniprot Accession	Uniprot ID	Description	Fold Change (log2(LDH/WT))	Adjusted p-value
	P78007	LDH_MYCPN	L-lactate dehydrogenase	-6.08933	0
	P78028	DYR_MYCPN	Dihydrofolate reductase	-3.27593	1.47105e-14
	P75460	NRDI_MYCPN	Protein nrdI	-3.05786	6.22042e-13
	P75070	KITH_MYCPN	Thymidine kinase	-2.79309	7.37484e-11
	P78029	TYSY_MYCPN	Thymidylate synthase	-2.56209	3.69454e-09
	P78027	RIR1_MYCPN	Ribonucleoside-diphosphate reductase subunit alpha	-2.0814	3.59542e-06
	Q50327	ATPF_MYCPN	ATP synthase subunit b	-1.6552	0.000412195
	P75461	RIR2_MYCPN	Ribonucleoside-diphosphate reductase subunit beta	-1.46083	0.00236092
	P75206	AMPA_MYCPN	Probable cytosol aminopeptidase	-1.44039	0.0027969
	P75396	Y386_MYCPN	Uncharacterized protein MG268 homolog	-1.37105	0.00509668
	P75177	DPO3X_MYCPN	DNA polymerase III subunit gamma/tau	-1.36783	0.005109
	P75053	DEOD_MYCPN	Purine nucleoside phosphorylase deoD-type	-1.32817	0.00696131
	Q50294	CBIO1_MYCPN	Putative ABC transporter ATP-binding protein MG304 homolog; Cobalt import ATP-binding protein cbiO 2; Cobalt import ATP-binding protein cbiO 1	-1.31804	0.0074338
	P75521	SYN_MYCPN	Asparaginyl-tRNA synthetase	-1.30028	0.00829109
	P75351	HRCA_MYCPN	Heat-inducible transcription repressor hrcA	-1.27141	0.009963
	P75441	Y337_MYCPN	Uncharacterized protein MG241 homolog	-1.26765	0.0100684
	P75063	Y051_MYCPN	Uncharacterized protein MG039 homolog	-1.26092	0.0104436
	P75052	TYPH_MYCPN	Thymidine phosphorylase	-1.24311	0.0116649
	P75168	PT1_MYCPN	Phosphoenolpyruvate-protein phosphotransferase	-1.1586	0.0220591
	P75089	ALF_MYCPN	Fructose-bisphosphate aldolase	-1.14889	0.0233815
	P75054	SRP54_MYCPN	Signal recognition particle protein	-1.09731	0.031913
	P22447	GYRB_MYCPN	DNA gyrase subunit B	-1.06827	0.0376892
	Q59549	DNAA_MYCPN	Chromosomal replication initiator protein dnaA	0.952164	0.048309
	Q50297	RS13_MYCPN	30S ribosomal protein S13	0.964033	0.0457086
	P75429	Y349_MYCPN	Uncharacterized protein MG246 homolog	0.97628	0.0424597
	P75041	Y076_MYCPN	Uncharacterized protein MG061 homolog 1	0.996725	0.0376892
	P75131	RS16_MYCPN	30S ribosomal protein S16	1.00187	0.0374798
	P75069	SYH_MYCPN	Histidyl-tRNA synthetase	1.05862	0.0265006
	P75542	SSB_MYCPN	Single-stranded DNA-binding protein	1.06101	0.0264915
	P75440	Y338_MYCPN	Uncharacterized protein MG242 homolog	1.15216	0.0134114
	P75161	RRF_MYCPN	Ribosome-recycling factor	1.18528	0.0107645
	P75525	PPH_MYCPN	Putative protein phosphatase	1.20421	0.009963
	Q50308	RL14_MYCPN	50S ribosomal protein L14	1.22781	0.00830187
	P75225	SYT_MYCPN	Threonyl-tRNA synthetase	1.25861	0.00696131
	P75533	GATB_MYCPN	Aspartyl/glutamyl-tRNA(Asn/Gln) amidotransferase subunit B	1.31781	0.00449896
	P75545	RS7_MYCPN	30S ribosomal protein S7	1.41028	0.00201635
	P75250	IPYR_MYCPN	Inorganic pyrophosphatase	1.47403	0.0010915
	P75552	OPPD_MYCPN	Oligopeptide transport ATP-binding protein oppD	1.48721	0.000983969
	P75205	CH10_MYCPN	10 kDa chaperonin	1.53573	0.000610083
	P75383	Y400_MYCPN	Uncharacterized protein MG281 homolog	1.53638	0.000610083
	Q50304	RS8_MYCPN	30S ribosomal protein S8	1.55304	0.00054402
	P75409	CARDS_MYCPN	ADP-ribosylating toxin CARDS	1.60743	0.000336961
	P75442	Y336_MYCPN	Uncharacterized protein MG240 homolog	1.63217	0.000266418
	P75329	Y454_MYCPN	Uncharacterized protein MG319 homolog	1.63638	0.000265565
	P75327	Y456_MYCPN	Uncharacterized lipoprotein MG321 homolog	1.70202	0.000137135
	P46775	RS4_MYCPN	30S ribosomal protein S4	1.7201	0.000116659
	P75405	Y376_MYCPN	Uncharacterized protein MPN_376	1.73534	0.000102741
	P78017	GRPE_MYCPN	Protein grpE	2.12241	8.185e-07
	P75512	THIO_MYCPN	Thioredoxin	2.34223	3.50682e-08
	P75479	PLSC_MYCPN	Probable 1-acyl-sn-glycerol-3-phosphate acyltransferase	2.72939	7.37484e-11
	P75295	Y491_MYCPN	Uncharacterized protein MPN_491	3.06317	1.66718e-13
	P75511	Y264_MYCPN	Uncharacterized protein MG125 homolog	3.31067	0
	Mix1 - PrkC vs WT (n=3)
	Uniprot Accession	Uniprot ID	Description	Fold Change (log2(PrkC/WT))	Adjusted p-value
	Q50360	HMW3_MYCPN	Cytadherence high molecular weight protein 3	-4.42146	0
	P75395	Y387_MYCPN	Uncharacterized protein MG269 homolog	-3.96203	0
	Q50303	RL6_MYCPN	50S ribosomal protein L6	-2.8365	2.76879e-11
	P78035	RL1_MYCPN	50S ribosomal protein L1	-2.67423	4.03158e-10
	P75211	P200_MYCPN	Protein P200	-2.52838	4.02671e-09
	Q50341	MGP3_MYCPN	Mgp-operon protein 3	-2.35845	5.36876e-08
	P75055	GCP_MYCPN	Probable O-sialoglycoprotein endopeptidase	-2.1047	1.80629e-06
	P75460	NRDI_MYCPN	Protein nrdI	-1.88897	2.67284e-05
	P75092	PIP_MYCPN	Putative proline iminopeptidase	-1.85378	3.805e-05
	P75145	PTMA_MYCPN	Mannitol-specific phosphotransferase enzyme IIA component	-1.72102	0.00017677
	P75070	KITH_MYCPN	Thymidine kinase	-1.69744	0.000215244
	P75560	RS2_MYCPN	30S ribosomal protein S2	-1.64386	0.000370222
	P75383	Y400_MYCPN	Uncharacterized protein MG281 homolog	-1.63263	0.000392305
	P75461	RIR2_MYCPN	Ribonucleoside-diphosphate reductase subunit beta	-1.59219	0.000577216
	P75329	Y454_MYCPN	Uncharacterized protein MG319 homolog	-1.52146	0.00112321
	P75426	DPO3A_MYCPN	Uncharacterized protein MG010 homolog; DNA primase; DNA polymerase III subunit alpha	-1.46063	0.00196551
	P75085	EFP_MYCPN	Elongation factor P	-1.40227	0.00319522
	P78024	IF3_MYCPN	Translation initiation factor IF-3	-1.32795	0.00597095
	P75471	HMW2_MYCPN	Cytadherence high molecular weight protein 2	-1.24583	0.0107961
	P75440	Y338_MYCPN	Uncharacterized protein MG242 homolog	-1.23447	0.0111187
	P78027	RIR1_MYCPN	Ribonucleoside-diphosphate reductase subunit alpha	-1.22882	0.0112976
	P75354	DNAJM_MYCPN	DnaJ-like protein MG200 homolog	-1.152	0.0198594
	P75089	ALF_MYCPN	Fructose-bisphosphate aldolase	-1.12553	0.0233105
	P78028	DYR_MYCPN	Dihydrofolate reductase	-1.11508	0.0246826
	P75580	RL3_MYCPN	50S ribosomal protein L3	-1.07907	0.0312197
	P75442	Y336_MYCPN	Uncharacterized protein MG240 homolog	1.11381	0.0398242
	Q50313	DPO3B_MYCPN	DNA polymerase III subunit beta	1.16779	0.0289075
	P75094	Y019_MYCPN	Putative ABC transporter ATP-binding protein MG015 homolog	1.22239	0.0201473
	P75090	RPOE_MYCPN	Probable DNA-directed RNA polymerase subunit delta	1.31179	0.0111187
	P75391	ODPB_MYCPN	Pyruvate dehydrogenase E1 component subunit beta	1.32289	0.0107961
	P75477	SCPB_MYCPN	Segregation and condensation protein B	1.40372	0.00597095
	P75446	Y118_MYCPN	Uncharacterized protein MG199 homolog	1.59534	0.00112321
	P75504	YHIT_MYCPN	Uncharacterized 16.1 kDa HIT-like protein	1.9855	2.26897e-05
	Mix2 - PrkC vs WT (n=3)
	Uniprot Accession	Uniprot ID	Description	Fold Change (log2(PrkC/WT))	Adjusted p-value
	Q50360	HMW3_MYCPN	Cytadherence high molecular weight protein 3	-3.54432	0
	Q50341	MGP3_MYCPN	Mgp-operon protein 3	-3.10822	7.34413e-13
	Q50303	RL6_MYCPN	50S ribosomal protein L6	-2.88583	2.77853e-11
	P75460	NRDI_MYCPN	Protein nrdI	-2.44856	3.62701e-08
	P75070	KITH_MYCPN	Thymidine kinase	-2.17235	1.55991e-06
	P78004	DNAJ_MYCPN	Chaperone protein dnaJ	-1.76553	0.000227057
	P75461	RIR2_MYCPN	Ribonucleoside-diphosphate reductase subunit beta	-1.73293	0.000305785
	P75177	DPO3X_MYCPN	DNA polymerase III subunit gamma/tau	-1.7169	0.000341066
	P75092	PIP_MYCPN	Putative proline iminopeptidase	-1.66985	0.000506423
	P75055	GCP_MYCPN	Probable O-sialoglycoprotein endopeptidase	-1.65069	0.000588862
	P75040	Y077_MYCPN	Uncharacterized protein MG061 homolog 2	-1.60942	0.000824531
	Q50331	ATPB_MYCPN	ATP synthase subunit beta	-1.59469	0.000916641
	P75115	Y677_MYCPN	Uncharacterized protein MG461 homolog	-1.5765	0.00105823
	P75069	SYH_MYCPN	Histidyl-tRNA synthetase	-1.44856	0.0032485
	P75329	Y454_MYCPN	Uncharacterized protein MG319 homolog	-1.35256	0.00718346
	P78027	RIR1_MYCPN	Ribonucleoside-diphosphate reductase subunit alpha	-1.3341	0.00820418
	Q50327	ATPF_MYCPN	ATP synthase subunit b	-1.30386	0.0100617
	Q50329	ATPA_MYCPN	ATP synthase subunit alpha	-1.2452	0.0152678
	P75211	P200_MYCPN	Protein P200	-1.21112	0.0186841
	P75560	RS2_MYCPN	30S ribosomal protein S2	-1.19994	0.0199553
	P75504	YHIT_MYCPN	Uncharacterized 16.1 kDa HIT-like protein	-1.18332	0.0222768
	P75479	PLSC_MYCPN	Probable 1-acyl-sn-glycerol-3-phosphate acyltransferase	-1.12928	0.031092
	P75493	Y284_MYCPN	Uncharacterized lipoprotein MPN_284	-1.11346	0.0340804
	P75205	CH10_MYCPN	10 kDa chaperonin	-1.10822	0.0340804
	P75440	Y338_MYCPN	Uncharacterized protein MG242 homolog	-1.10822	0.0340804
	Q50306	RL5_MYCPN	50S ribosomal protein L5	-1.0978	0.0347926
	P75359	PTA_MYCPN	Phosphate acetyltransferase	1.03355	0.0340804
	P75312	Y664_MYCPN	UPF0230 protein MG450 homolog; UPF0230 protein MG326 homolog	1.03474	0.0340804
	P75446	Y118_MYCPN	Uncharacterized protein MG199 homolog	1.07902	0.0279908
	P75041	Y076_MYCPN	Uncharacterized protein MG061 homolog 1	1.08703	0.0269192
	P75477	SCPB_MYCPN	Segregation and condensation protein B	1.15503	0.017148
	P75511	Y264_MYCPN	Uncharacterized protein MG125 homolog	1.16588	0.0160988
	P75442	Y336_MYCPN	Uncharacterized protein MG240 homolog	1.20847	0.0118488
	P75466	Y071_MYCPN	S-adenosyl-L-methionine-dependent methyltransferase mraW; UPF0011 protein MG056 homolog	1.22723	0.0103665
	P75508	PPNK_MYCPN	Probable inorganic polyphosphate/ATP-NAD kinase	1.24064	0.0098197
	P75510	SYW_MYCPN	Tryptophanyl-tRNA synthetase	1.33304	0.0046717
	P75399	Y381_MYCPN	Uncharacterized protein MG263 homolog; Uncharacterized protein MPN_427; Uncharacterized protein MG265 homolog	1.35026	0.00411838
	P75391	ODPB_MYCPN	Pyruvate dehydrogenase E1 component subunit beta	1.39243	0.00296456
	Q50313	DPO3B_MYCPN	DNA polymerase III subunit beta	1.39428	0.00296456
	P75512	THIO_MYCPN	Thioredoxin	1.56952	0.00063081
	P75502	Y275_MYCPN	Uncharacterized protein MG134 homolog	2.73089	1.07202e-10

## Sheet: TMT
	Supplementary Table ST2E: List of proteins with significant changes in abundance (TMT)
	Label Set 1 (126, 128, 130) - LDH vs WT (n=3)
	Uniprot Accession	Uniprot ID	Description	Fold Change (log2(LDH/WT))	Adjusted p-value
	P75205	CH10_MYCPN	10 kDa chaperonin	-0.602332	2.15447e-06
	P75063	Y051_MYCPN	Uncharacterized protein MG039 homolog	-0.52676	4.06312e-05
	P75053	DEOD_MYCPN	Purine nucleoside phosphorylase deoD-type	-0.635206	5.78978e-07
	P78012	CH60_MYCPN	60 kDa chaperonin	-0.798576	2.23237e-10
	P75206	AMPA_MYCPN	Probable cytosol aminopeptidase	-0.962508	1.19016e-14
	P75460	NRDI_MYCPN	Protein nrdI	-2.41757	0
	P75189	ENO_MYCPN	Enolase	-0.336853	0.0111126
	P75467	MRAZ_MYCPN	Protein mraZ	0.403945	0.00245641
	P75512	THIO_MYCPN	Thioredoxin	1.69101	0
	P75145	PTMA_MYCPN	Mannitol-specific phosphotransferase enzyme IIA component	-0.706669	2.27618e-08
	P75239	RL7_MYCPN	50S ribosomal protein L7/L12	0.470252	0.000364049
	P75504	YHIT_MYCPN	Uncharacterized 16.1 kDa HIT-like protein	0.900662	1.10808e-12
	P75389	NAOX_MYCPN	Probable NADH oxidase	0.975272	9.29812e-15
	P75089	ALF_MYCPN	Fructose-bisphosphate aldolase	-0.371278	0.00474864
	P78028	DYR_MYCPN	Dihydrofolate reductase	-2.1429	0
	P75482	Y295_MYCPN	Uncharacterized protein MG210.1 homolog	0.6121	2.0968e-06
	P78018	PGK_MYCPN	Phosphoglycerate kinase	0.310697	0.0245886
	Q9EXD2	Y272_MYCPN	Uncharacterized protein MPN_272	-0.60969	1.65434e-06
	P78007	LDH_MYCPN	L-lactate dehydrogenase	-1.94379	0
	P75248	Y530_MYCPN	Uncharacterized protein MG354 homolog	-0.739731	4.49495e-09
	P75483	Y294_MYCPN	Uncharacterized protein MPN_294	-0.349997	0.00802608
	Q9EXD8	ULAB_MYCPN	Ascorbate-specific phosphotransferase enzyme IIB component	0.468257	0.000381979
	P75270	Y517_MYCPN	Uncharacterized protein MG342 homolog	0.293895	0.035168
	P78027	RIR1_MYCPN	Ribonucleoside-diphosphate reductase subunit alpha	-1.33511	0
	P75129	MSRB_MYCPN	Peptide methionine sulfoxide reductase msrB	-0.411129	0.00160432
	P78017	GRPE_MYCPN	Protein grpE	0.361035	0.00761768
	P46775	RS4_MYCPN	30S ribosomal protein S4	1.48538	0
	P75310	Y474_MYCPN	Uncharacterized protein MG328 homolog	-0.360598	0.00629598
	P75461	RIR2_MYCPN	Ribonucleoside-diphosphate reductase subunit beta	-1.27204	0
	P75409	CARDS_MYCPN	ADP-ribosylating toxin CARDS	0.621557	1.46839e-06
	P75161	RRF_MYCPN	Ribosome-recycling factor	0.541259	3.30319e-05
	P75271	RPOC_MYCPN	DNA-directed RNA polymerase subunit beta'	0.285986	0.040692
	P75159	T1SX_MYCPN	Putative type I restriction enzyme specificity protein MPN_638	-0.462543	0.000354035
	P75062	Y052_MYCPN	Uncharacterized lipoprotein MG040 homolog	-0.713447	1.64704e-08
	P75545	RS7_MYCPN	30S ribosomal protein S7	0.573174	9.98817e-06
	P75446	Y118_MYCPN	Uncharacterized protein MG199 homolog	0.434928	0.00104944
	P75120	FTSH_MYCPN	Cell division protease ftsH homolog	-0.406545	0.00181503
	P75061	PTHP_MYCPN	Phosphocarrier protein HPr	-0.582547	4.95181e-06
	P75131	RS16_MYCPN	30S ribosomal protein S16	0.531736	4.54486e-05
	P75542	SSB_MYCPN	Single-stranded DNA-binding protein	0.458238	0.000527063
	P78011	GLYA_MYCPN	Serine hydroxymethyltransferase	-0.476889	0.000224504
	Q50329	ATPA_MYCPN	ATP synthase subunit alpha	-0.484598	0.000174621
	Q50314	PARA_MYCPN	ParA family protein MPN_688	0.388728	0.00374308
	P75508	PPNK_MYCPN	Probable inorganic polyphosphate/ATP-NAD kinase	0.877166	4.32595e-12
	P78035	RL1_MYCPN	50S ribosomal protein L1	1.20232	0
	P75054	SRP54_MYCPN	Signal recognition particle protein	-0.276216	0.0412987
	P75405	Y376_MYCPN	Uncharacterized protein MPN_376	1.06746	0
	P75541	RS18_MYCPN	30S ribosomal protein S18	0.743718	5.67261e-09
	P75481	Y297_MYCPN	Uncharacterized protein MG211 homolog	0.291075	0.0370062
	P75133	RL19_MYCPN	50S ribosomal protein L19	1.24578	0
	P78026	RL21_MYCPN	50S ribosomal protein L21	0.797157	3.77392e-10
	P75188	MSRA_MYCPN	Peptide methionine sulfoxide reductase msrA	1.18724	0
	P78029	TYSY_MYCPN	Thymidylate synthase	-1.41205	0
	P75470	Y311_MYCPN	Uncharacterized protein MG218.1 homolog	0.877542	4.32595e-12
	P75518	Y256_MYCPN	Uncharacterized protein MG117 homolog	0.305118	0.0278642
	P75121	Y670_MYCPN	Uncharacterized protein MG456 homolog	-0.324693	0.0148101
	P75550	RL11_MYCPN	50S ribosomal protein L11	0.756447	3.02445e-09
	P75502	Y275_MYCPN	Uncharacterized protein MG134 homolog	-0.904475	5.15381e-13
	P75107	SYS_MYCPN	Seryl-tRNA synthetase	-0.359712	0.00640173
	Q59549	DNAA_MYCPN	Chromosomal replication initiator protein dnaA	0.349698	0.0100765
	P75551	OPPF_MYCPN	Oligopeptide transport ATP-binding protein oppF	0.333347	0.0148101
	P75543	RS6_MYCPN	30S ribosomal protein S6	-0.288816	0.0327095
	Q50297	RS13_MYCPN	30S ribosomal protein S13	0.336085	0.0141167
	P75045	Y072_MYCPN	Uncharacterized protein MG057 homolog	-0.325126	0.0147957
	Q50365	HMW1_MYCPN	Cytadherence high molecular weight protein 1	0.658341	3.3136e-07
	P75041	Y076_MYCPN	Uncharacterized protein MG061 homolog 1	0.421583	0.0015388
	Q50332	ATPE_MYCPN	ATP synthase epsilon chain	-0.319944	0.0163826
	Q50293	CBIO1_MYCPN	Putative ABC transporter ATP-binding protein MG304 homolog; Cobalt import ATP-binding protein cbiO 2; Cobalt import ATP-binding protein cbiO 1	-0.476889	0.000224504
	P75295	Y491_MYCPN	Uncharacterized protein MPN_491	0.410715	0.0020217
	P75540	RL9_MYCPN	50S ribosomal protein L9	0.688223	8.60987e-08
	P75399	Y381_MYCPN	Uncharacterized protein MG263 homolog; Uncharacterized protein MPN_427; Uncharacterized protein MG265 homolog	-0.503076	9.34483e-05
	P75582	Y163_MYCPN	Uncharacterized protein MG149.1 homolog	-0.441757	0.000656856
	P78034	PTH_MYCPN	Peptidyl-tRNA hydrolase	0.411753	0.0019754
	P75578	RL23_MYCPN	50S ribosomal protein L23	-0.357056	0.0068322
	P53527	RPIB_MYCPN	Probable ribose-5-phosphate isomerase B	0.430835	0.00118385
	P75050	MANB_MYCPN	Phosphomannomutase	0.422099	0.00152775
	P75521	SYN_MYCPN	Asparaginyl-tRNA synthetase	-0.381138	0.00364146
	P78032	TOP1_MYCPN	DNA topoisomerase 1	0.3012	0.0303275
	Q50328	ATPD_MYCPN	ATP synthase subunit delta	-0.853047	1.06393e-11
	P75558	UVRB_MYCPN	UvrABC system protein B	-0.404715	0.001887
	P75329	Y454_MYCPN	Uncharacterized protein MG319 homolog	0.363184	0.00724132
	P78004	DNAJ_MYCPN	Chaperone protein dnaJ	-0.581514	5.10202e-06
	Q50316	Y685_MYCPN	Putative ABC transporter ATP-binding protein MG468.1 homolog	-0.272457	0.0445912
	P75106	KTHY_MYCPN	Thymidylate kinase	-0.545789	1.98075e-05
	P75385	Y398_MYCPN	Uncharacterized protein MG279 homolog	0.571316	1.06371e-05
	Q50330	ATPG_MYCPN	ATP synthase gamma chain	-1.33337	0
	P75515	Y259_MYCPN	Uncharacterized protein MG120 homolog	-0.321238	0.0159726
	P75258	SYI_MYCPN	Isoleucyl-tRNA synthetase	0.430322	0.00119246
	P75177	DPO3X_MYCPN	DNA polymerase III subunit gamma/tau	-0.771209	9.05913e-10
	P75577	RL2_MYCPN	50S ribosomal protein L2	1.04621	0
	P75306	Y478_MYCPN	UPF0082 protein MG332 homolog	-0.770031	9.28091e-10
	P75471	HMW2_MYCPN	Cytadherence high molecular weight protein 2	0.363184	0.00724132
	P78025	LON_MYCPN	ATP-dependent protease La	0.646919	5.33087e-07
	P75522	RPE_MYCPN	Probable ribulose-phosphate 3-epimerase	-0.555906	1.3547e-05
	P75176	UVRA_MYCPN	UvrABC system protein A	-0.449281	0.000527063
	P78023	RL20_MYCPN	50S ribosomal protein L20	0.984028	6.46826e-15
	P75094	Y019_MYCPN	Putative ABC transporter ATP-binding protein MG015 homolog	-0.284604	0.0353155
	P75187	Y608_MYCPN	Uncharacterized protein MG409 homolog	0.496435	0.000158506
	P75479	PLSC_MYCPN	Probable 1-acyl-sn-glycerol-3-phosphate acyltransferase	0.860146	1.1128e-11
	P75386	SPOT_MYCPN	Probable guanosine-3',5'-bis(diphosphate) 3'-pyrophosphohydrolase	0.27661	0.0487641
	P75453	Y109_MYCPN	Uncharacterized protein MPN_109	0.860527	1.1128e-11
	P75440	Y338_MYCPN	Uncharacterized protein MG242 homolog	0.642944	5.89291e-07
	P75122	SYY_MYCPN	Tyrosyl-tRNA synthetase	-0.267046	0.0492518
	P75526	KGUA_MYCPN	Guanylate kinase	0.64427	5.78978e-07
	P75069	SYH_MYCPN	Histidyl-tRNA synthetase	-0.779483	6.02473e-10
	P75221	MNMG_MYCPN	tRNA uridine 5-carboxymethylaminomethyl modification enzyme mnmG	-0.343848	0.00938571
	P75489	Y288_MYCPN	Uncharacterized lipoprotein MPN_288	0.645154	5.683e-07
	P75308	KCY_MYCPN	Cytidylate kinase	1.06499	0
	P75383	Y400_MYCPN	Uncharacterized protein MG281 homolog	1.18207	0
	P75068	SYD_MYCPN	Aspartyl-tRNA synthetase	-0.440819	0.000671078
	P75564	SYFA_MYCPN	Phenylalanyl-tRNA synthetase alpha chain	0.577808	8.36674e-06
	P75210	ERA_MYCPN	GTP-binding protein era homolog	-0.28713	0.0337761
	P75167	GPMI_MYCPN	2,3-bisphosphoglycerate-independent phosphoglycerate mutase	0.327855	0.0166427
	P75314	Y469_MYCPN	Uncharacterized protein MG323.1 homolog	-0.27204	0.0447232
	P75554	OPPB_MYCPN	Oligopeptide transport system permease protein oppB	0.390837	0.00357906
	P75441	Y337_MYCPN	Uncharacterized protein MG241 homolog	-0.628785	7.39209e-07
	P75506	CNPD_MYCPN	2',3'-cyclic-nucleotide 2'-phosphodiesterase	0.374682	0.00548467
	P75498	LEPA_MYCPN	GTP-binding protein lepA	-0.406087	0.00182506
	P75438	Y340_MYCPN	Probable DNA helicase MPN_340	-0.428684	0.000975484
	Q50288	Y200_MYCPN	Uncharacterized lipoprotein MPN_200	-1.05132	0
	P75095	Y018_MYCPN	Putative ABC transporter ATP-binding protein MG014 homolog	-0.31092	0.0201829
	P75109	Y684_MYCPN	Uncharacterized ABC transporter permease MG468 homolog	-0.673246	1.13776e-07
	Label Set 2 (127, 129, 131) - LDH vs WT (n=3)
	Uniprot Accession	Uniprot ID	Description	Fold Change (log2(LDH/WT))	Adjusted p-value
	P75205	CH10_MYCPN	10 kDa chaperonin	-0.350902	0.0093972
	P75063	Y051_MYCPN	Uncharacterized protein MG039 homolog	-0.491468	0.000171236
	P75053	DEOD_MYCPN	Purine nucleoside phosphorylase deoD-type	-0.549109	2.34258e-05
	P78012	CH60_MYCPN	60 kDa chaperonin	-0.72867	1.15713e-08
	P75206	AMPA_MYCPN	Probable cytosol aminopeptidase	-0.911679	5.19005e-13
	P75460	NRDI_MYCPN	Protein nrdI	-2.29973	0
	Q9EXD3	Y377_MYCPN	Uncharacterized protein MPN_377	-0.371721	0.00581622
	P75512	THIO_MYCPN	Thioredoxin	1.6046	0
	P75145	PTMA_MYCPN	Mannitol-specific phosphotransferase enzyme IIA component	-0.467069	0.000376771
	P75239	RL7_MYCPN	50S ribosomal protein L7/L12	0.464109	0.000376771
	P75504	YHIT_MYCPN	Uncharacterized 16.1 kDa HIT-like protein	0.825896	6.75913e-11
	P75389	NAOX_MYCPN	Probable NADH oxidase	0.732616	8.47165e-09
	P75089	ALF_MYCPN	Fructose-bisphosphate aldolase	-0.397106	0.0030028
	P78028	DYR_MYCPN	Dihydrofolate reductase	-2.06463	0
	P75482	Y295_MYCPN	Uncharacterized protein MG210.1 homolog	0.649098	3.45521e-07
	P78007	LDH_MYCPN	L-lactate dehydrogenase	-2.01663	0
	P78031	KPYK_MYCPN	Pyruvate kinase	0.401196	0.00246387
	P75248	Y530_MYCPN	Uncharacterized protein MG354 homolog	-0.708403	2.79792e-08
	P75483	Y294_MYCPN	Uncharacterized protein MPN_294	-0.356701	0.00816989
	Q9EXD8	ULAB_MYCPN	Ascorbate-specific phosphotransferase enzyme IIB component	0.460345	0.000421156
	P75270	Y517_MYCPN	Uncharacterized protein MG342 homolog	0.360876	0.0069088
	P78027	RIR1_MYCPN	Ribonucleoside-diphosphate reductase subunit alpha	-1.23574	0
	P75129	MSRB_MYCPN	Peptide methionine sulfoxide reductase msrB	-0.307736	0.0245412
	P46775	RS4_MYCPN	30S ribosomal protein S4	1.43899	0
	P75310	Y474_MYCPN	Uncharacterized protein MG328 homolog	-0.318205	0.0204288
	P75461	RIR2_MYCPN	Ribonucleoside-diphosphate reductase subunit beta	-1.22056	0
	P75409	CARDS_MYCPN	ADP-ribosylating toxin CARDS	0.580526	6.61523e-06
	P75271	RPOC_MYCPN	DNA-directed RNA polymerase subunit beta'	0.273477	0.0454195
	P75457	END4_MYCPN	Probable endonuclease 4	-0.309342	0.0237771
	P75159	T1SX_MYCPN	Putative type I restriction enzyme specificity protein MPN_638	-0.365861	0.006731
	P75062	Y052_MYCPN	Uncharacterized lipoprotein MG040 homolog	-0.811575	1.79191e-10
	P75509	Y266_MYCPN	Uncharacterized protein MG127 homolog	0.313672	0.020982
	P75545	RS7_MYCPN	30S ribosomal protein S7	0.700066	3.55556e-08
	Q50306	RL5_MYCPN	50S ribosomal protein L5	0.333871	0.0130148
	P75446	Y118_MYCPN	Uncharacterized protein MG199 homolog	0.327169	0.0152169
	P75120	FTSH_MYCPN	Cell division protease ftsH homolog	-0.356701	0.00816989
	P75061	PTHP_MYCPN	Phosphocarrier protein HPr	-0.564366	1.40249e-05
	P75131	RS16_MYCPN	30S ribosomal protein S16	0.546754	2.30118e-05
	P75542	SSB_MYCPN	Single-stranded DNA-binding protein	0.352777	0.00827808
	Q50360	HMW3_MYCPN	Cytadherence high molecular weight protein 3	0.273477	0.0454195
	Q50329	ATPA_MYCPN	ATP synthase subunit alpha	-0.558626	1.69328e-05
	P75396	Y386_MYCPN	Uncharacterized protein MG268 homolog	-0.345127	0.0107005
	Q50314	PARA_MYCPN	ParA family protein MPN_688	0.373441	0.00511506
	P75508	PPNK_MYCPN	Probable inorganic polyphosphate/ATP-NAD kinase	0.658985	2.24997e-07
	P78035	RL1_MYCPN	50S ribosomal protein L1	1.05937	0
	P75054	SRP54_MYCPN	Signal recognition particle protein	-0.3954	0.0031299
	P75405	Y376_MYCPN	Uncharacterized protein MPN_376	1.00744	0
	P75541	RS18_MYCPN	30S ribosomal protein S18	0.75737	2.47024e-09
	P75481	Y297_MYCPN	Uncharacterized protein MG211 homolog	0.274817	0.0446504
	P75133	RL19_MYCPN	50S ribosomal protein L19	1.26554	0
	P75233	RNC_MYCPN	Ribonuclease 3	-0.311754	0.0230649
	P78026	RL21_MYCPN	50S ribosomal protein L21	0.938754	7.4607e-14
	P75188	MSRA_MYCPN	Peptide methionine sulfoxide reductase msrA	0.556484	1.64956e-05
	P78029	TYSY_MYCPN	Thymidylate synthase	-1.49603	0
	P75470	Y311_MYCPN	Uncharacterized protein MG218.1 homolog	0.725184	1.15713e-08
	P75518	Y256_MYCPN	Uncharacterized protein MG117 homolog	0.306875	0.023552
	P75550	RL11_MYCPN	50S ribosomal protein L11	0.693667	4.60666e-08
	P75298	CSD_MYCPN	Probable cysteine desulfurase	-0.299735	0.0286771
	P75502	Y275_MYCPN	Uncharacterized protein MG134 homolog	-0.794608	4.39748e-10
	P75107	SYS_MYCPN	Seryl-tRNA synthetase	-0.384358	0.00420519
	P75454	TIG_MYCPN	Trigger factor	-0.287815	0.0365238
	Q59549	DNAA_MYCPN	Chromosomal replication initiator protein dnaA	0.357339	0.00754989
	P75543	RS6_MYCPN	30S ribosomal protein S6	-0.296547	0.0304865
	Q50297	RS13_MYCPN	30S ribosomal protein S13	0.36239	0.00673563
	P75045	Y072_MYCPN	Uncharacterized protein MG057 homolog	-0.365026	0.00677571
	Q50365	HMW1_MYCPN	Cytadherence high molecular weight protein 1	0.568337	1.06423e-05
	P75367	Y566_MYCPN	Uncharacterized protein MG385 homolog; Uncharacterized protein MG293 homolog	0.377938	0.00453983
	P75540	RL9_MYCPN	50S ribosomal protein L9	0.717714	1.62185e-08
	P75092	PIP_MYCPN	Putative proline iminopeptidase	-0.306934	0.0246815
	P75399	Y381_MYCPN	Uncharacterized protein MG263 homolog; Uncharacterized protein MPN_427; Uncharacterized protein MG265 homolog	-0.476058	0.000285358
	P75582	Y163_MYCPN	Uncharacterized protein MG149.1 homolog	-0.486464	0.000200163
	P78034	PTH_MYCPN	Peptidyl-tRNA hydrolase	0.456571	0.000473579
	P75085	EFP_MYCPN	Elongation factor P	-0.31095	0.023353
	P75050	MANB_MYCPN	Phosphomannomutase	0.297411	0.0283144
	P75521	SYN_MYCPN	Asparaginyl-tRNA synthetase	-0.443957	0.000782887
	P78032	TOP1_MYCPN	DNA topoisomerase 1	0.294771	0.0297222
	Q50328	ATPD_MYCPN	ATP synthase subunit delta	-0.782292	7.96713e-10
	P75558	UVRB_MYCPN	UvrABC system protein B	-0.421209	0.00157075
	P75329	Y454_MYCPN	Uncharacterized protein MG319 homolog	0.420214	0.00148308
	P78004	DNAJ_MYCPN	Chaperone protein dnaJ	-0.675934	1.25323e-07
	Q50316	Y685_MYCPN	Putative ABC transporter ATP-binding protein MG468.1 homolog	-1.07825	0
	P75106	KTHY_MYCPN	Thymidylate kinase	-0.446605	0.00072517
	P75385	Y398_MYCPN	Uncharacterized protein MG279 homolog	0.494796	0.000138732
	P75216	NADE_MYCPN	Probable NH(3)-dependent NAD(+) synthetase	-0.381822	0.00448369
	P75426	DPO3A_MYCPN	Uncharacterized protein MG010 homolog; DNA primase; DNA polymerase III subunit alpha	-0.31417	0.0222212
	Q50330	ATPG_MYCPN	ATP synthase gamma chain	-1.25883	0
	P75515	Y259_MYCPN	Uncharacterized protein MG120 homolog	-0.495118	0.000151901
	P75258	SYI_MYCPN	Isoleucyl-tRNA synthetase	0.699068	3.61849e-08
	P75177	DPO3X_MYCPN	DNA polymerase III subunit gamma/tau	-0.710523	2.56787e-08
	P75577	RL2_MYCPN	50S ribosomal protein L2	0.807864	1.79191e-10
	P75306	Y478_MYCPN	UPF0082 protein MG332 homolog	-0.759067	2.59874e-09
	P75471	HMW2_MYCPN	Cytadherence high molecular weight protein 2	0.341054	0.0108813
	P78025	LON_MYCPN	ATP-dependent protease La	0.780953	7.42579e-10
	P75522	RPE_MYCPN	Probable ribulose-phosphate 3-epimerase	-0.348424	0.00995948
	P75176	UVRA_MYCPN	UvrABC system protein A	-0.312559	0.0229418
	P78023	RL20_MYCPN	50S ribosomal protein L20	0.941964	6.39488e-14
	P75094	Y019_MYCPN	Putative ABC transporter ATP-binding protein MG015 homolog	-0.538713	3.30111e-05
	P75187	Y608_MYCPN	Uncharacterized protein MG409 homolog	0.538744	2.9532e-05
	P75479	PLSC_MYCPN	Probable 1-acyl-sn-glycerol-3-phosphate acyltransferase	0.787728	5.25119e-10
	P75453	Y109_MYCPN	Uncharacterized protein MPN_109	0.728709	1.01223e-08
	P75440	Y338_MYCPN	Uncharacterized protein MG242 homolog	0.548971	2.13629e-05
	P75122	SYY_MYCPN	Tyrosyl-tRNA synthetase	-0.418607	0.00167035
	P75526	KGUA_MYCPN	Guanylate kinase	0.659395	2.24618e-07
	P75069	SYH_MYCPN	Histidyl-tRNA synthetase	-0.867248	7.70541e-12
	P75221	MNMG_MYCPN	tRNA uridine 5-carboxymethylaminomethyl modification enzyme mnmG	-0.625058	1.15538e-06
	P75584	Y161_MYCPN	Uncharacterized protein MG148 homolog	-0.310146	0.023552
	P75489	Y288_MYCPN	Uncharacterized lipoprotein MPN_288	0.552953	1.84765e-05
	P75308	KCY_MYCPN	Cytidylate kinase	1.06062	0
	P75383	Y400_MYCPN	Uncharacterized protein MG281 homolog	1.19495	0
	P75068	SYD_MYCPN	Aspartyl-tRNA synthetase	-0.416875	0.00174556
	P75564	SYFA_MYCPN	Phenylalanyl-tRNA synthetase alpha chain	0.471609	0.000295341
	P75554	OPPB_MYCPN	Oligopeptide transport system permease protein oppB	0.332585	0.0133532
	P75441	Y337_MYCPN	Uncharacterized protein MG241 homolog	-0.617579	1.58518e-06
	P75056	Y058_MYCPN	Uncharacterized lipoprotein MG045 homolog	0.29952	0.0271251
	P75229	Y549_MYCPN	Uncharacterized protein MG371 homolog	-0.39796	0.00295437
	P75506	CNPD_MYCPN	2',3'-cyclic-nucleotide 2'-phosphodiesterase	0.423601	0.00134664
	P75498	LEPA_MYCPN	GTP-binding protein lepA	-0.345127	0.0107005
	P75438	Y340_MYCPN	Probable DNA helicase MPN_340	-0.531199	4.30574e-05
	Q50288	Y200_MYCPN	Uncharacterized lipoprotein MPN_200	-1.3869	0
	P75095	Y018_MYCPN	Putative ABC transporter ATP-binding protein MG014 homolog	-0.293365	0.032597
	P75175	Y620_MYCPN	Uncharacterized protein MG422 homolog	-0.391993	0.00339875
	P75109	Y684_MYCPN	Uncharacterized ABC transporter permease MG468 homolog	-0.543429	2.85365e-05
	Label Set 1 (126, 128, 130) - PrkC vs WT (n=3)
	Uniprot Accession	Uniprot ID	Description	Fold Change (log2(PrkC/WT))	Adjusted p-value
	P75358	G3P_MYCPN	Glyceraldehyde-3-phosphate dehydrogenase	0.303693	0.0496705
	P75205	CH10_MYCPN	10 kDa chaperonin	-0.429044	0.00207989
	P78012	CH60_MYCPN	60 kDa chaperonin	-0.479168	0.000468685
	P75223	Y555_MYCPN	Uncharacterized protein MG377 homolog	0.409801	0.00408937
	P75460	NRDI_MYCPN	Protein nrdI	-0.941943	4.21515e-13
	P75467	MRAZ_MYCPN	Protein mraZ	0.420255	0.00317872
	P75239	RL7_MYCPN	50S ribosomal protein L7/L12	-0.318448	0.0306075
	P75089	ALF_MYCPN	Fructose-bisphosphate aldolase	-0.467075	0.000681884
	Q50313	DPO3B_MYCPN	DNA polymerase III subunit beta	0.920303	2.30593e-12
	P78028	DYR_MYCPN	Dihydrofolate reductase	-0.638205	1.56492e-06
	P78018	PGK_MYCPN	Phosphoglycerate kinase	0.3358	0.0253393
	Q9EXD2	Y272_MYCPN	Uncharacterized protein MPN_272	-0.765709	4.3829e-09
	P75391	ODPB_MYCPN	Pyruvate dehydrogenase E1 component subunit beta	0.745305	1.92744e-08
	P75483	Y294_MYCPN	Uncharacterized protein MPN_294	0.492627	0.000407423
	P75359	PTA_MYCPN	Phosphate acetyltransferase	0.476438	0.000681884
	P75466	Y071_MYCPN	S-adenosyl-L-methionine-dependent methyltransferase mraW; UPF0011 protein MG056 homolog	0.664065	8.35175e-07
	P78027	RIR1_MYCPN	Ribonucleoside-diphosphate reductase subunit alpha	-0.774624	3.58849e-09
	P46775	RS4_MYCPN	30S ribosomal protein S4	-0.541202	6.71323e-05
	P75461	RIR2_MYCPN	Ribonucleoside-diphosphate reductase subunit beta	-1.20565	0
	P75457	END4_MYCPN	Probable endonuclease 4	0.434507	0.00227024
	P75269	Y518_MYCPN	Uncharacterized protein MG343 homolog	0.310734	0.0425637
	P75545	RS7_MYCPN	30S ribosomal protein S7	-0.30547	0.0395531
	P75516	Y258_MYCPN	Putative carbohydrate transport ATP-binding protein MPN_258	-0.412716	0.00310897
	P75446	Y118_MYCPN	Uncharacterized protein MG199 homolog	0.341312	0.0228905
	P75061	PTHP_MYCPN	Phosphocarrier protein HPr	-0.508612	0.000178323
	P75179	RS9_MYCPN	30S ribosomal protein S9	-0.309783	0.0364988
	P75398	SYL_MYCPN	Leucyl-tRNA synthetase	0.355	0.0164375
	Q50327	ATPF_MYCPN	ATP synthase subunit b	-0.355865	0.0133993
	Q50360	HMW3_MYCPN	Cytadherence high molecular weight protein 3	-1.3581	0
	P75052	TYPH_MYCPN	Thymidine phosphorylase	-0.491363	0.000326777
	Q50329	ATPA_MYCPN	ATP synthase subunit alpha	-0.42436	0.00232298
	P75405	Y376_MYCPN	Uncharacterized protein MPN_376	0.375291	0.0103015
	P75395	Y387_MYCPN	Uncharacterized protein MG269 homolog	-0.531096	8.02175e-05
	P75541	RS18_MYCPN	30S ribosomal protein S18	-0.464668	0.000724229
	P75481	Y297_MYCPN	Uncharacterized protein MG211 homolog	-0.360332	0.0120318
	P78029	TYSY_MYCPN	Thymidylate synthase	-0.59809	7.76596e-06
	P75470	Y311_MYCPN	Uncharacterized protein MG218.1 homolog	-0.665581	5.44129e-07
	P75518	Y256_MYCPN	Uncharacterized protein MG117 homolog	-0.638205	1.56492e-06
	P75502	Y275_MYCPN	Uncharacterized protein MG134 homolog	0.743225	1.99572e-08
	P75351	HRCA_MYCPN	Heat-inducible transcription repressor hrcA	-0.349191	0.0153776
	P75560	RS2_MYCPN	30S ribosomal protein S2	-0.329352	0.0241632
	Q50297	RS13_MYCPN	30S ribosomal protein S13	-0.531096	8.02175e-05
	Q50365	HMW1_MYCPN	Cytadherence high molecular weight protein 1	-0.351412	0.0149006
	P75295	Y491_MYCPN	Uncharacterized protein MPN_491	0.465754	0.000883527
	P75399	Y381_MYCPN	Uncharacterized protein MG263 homolog; Uncharacterized protein MPN_427; Uncharacterized protein MG265 homolog	0.547304	6.98773e-05
	P75312	Y664_MYCPN	UPF0230 protein MG450 homolog; UPF0230 protein MG326 homolog	0.31774	0.0368284
	P75329	Y454_MYCPN	Uncharacterized protein MG319 homolog	-0.566782	2.78481e-05
	P75579	RL4_MYCPN	50S ribosomal protein L4	-0.765709	4.3829e-09
	P75106	KTHY_MYCPN	Thymidylate kinase	0.426751	0.00274025
	P75563	SYFB_MYCPN	Phenylalanyl-tRNA synthetase beta chain	0.331653	0.0277806
	P75177	DPO3X_MYCPN	DNA polymerase III subunit gamma/tau	-0.415037	0.00294494
	P75471	HMW2_MYCPN	Cytadherence high molecular weight protein 2	-0.798669	1.05482e-09
	P75580	RL3_MYCPN	50S ribosomal protein L3	-0.462266	0.000769186
	P75401	Y381_MYCPN	Uncharacterized protein MG263 homolog; Uncharacterized protein MPN_427; Uncharacterized protein MG265 homolog	0.496338	0.000365832
	P75386	SPOT_MYCPN	Probable guanosine-3',5'-bis(diphosphate) 3'-pyrophosphohydrolase	0.44862	0.00149873
	Q50341	MGP3_MYCPN	Mgp-operon protein 3	-0.553936	4.51243e-05
	P75354	DNAJM_MYCPN	DnaJ-like protein MG200 homolog	-0.538669	6.98773e-05
	P75588	Y157_MYCPN	Uncharacterized protein MG144 homolog	-0.422024	0.00245455
	P75327	Y456_MYCPN	Uncharacterized lipoprotein MG321 homolog	0.412422	0.00390392
	P75383	Y400_MYCPN	Uncharacterized protein MG281 homolog	0.543723	7.54956e-05
	P75059	POTA_MYCPN	Spermidine/putrescine import ATP-binding protein potA	-0.316276	0.0318998
	P75506	CNPD_MYCPN	2',3'-cyclic-nucleotide 2'-phosphodiesterase	0.405203	0.00454721
	P75095	Y018_MYCPN	Putative ABC transporter ATP-binding protein MG014 homolog	0.416996	0.00345376
	P75109	Y684_MYCPN	Uncharacterized ABC transporter permease MG468 homolog	0.453718	0.00129363
	Label Set 2 (127, 129, 131) - PrkC vs WT (n=3)
	Uniprot Accession	Uniprot ID	Description	Fold Change (log2(PrkC/WT))	Adjusted p-value
	P75358	G3P_MYCPN	Glyceraldehyde-3-phosphate dehydrogenase	0.429143	0.00211853
	P75205	CH10_MYCPN	10 kDa chaperonin	-0.46997	0.000749104
	P75390	ODPA_MYCPN	Pyruvate dehydrogenase E1 component subunit alpha	0.300348	0.0464282
	P75053	DEOD_MYCPN	Purine nucleoside phosphorylase deoD-type	-0.307822	0.04394
	P78012	CH60_MYCPN	60 kDa chaperonin	-0.464164	0.000835824
	P75223	Y555_MYCPN	Uncharacterized protein MG377 homolog	0.422891	0.00248897
	P75460	NRDI_MYCPN	Protein nrdI	-1.19535	0
	P75467	MRAZ_MYCPN	Protein mraZ	0.464577	0.000773119
	Q9EXD3	Y377_MYCPN	Uncharacterized protein MPN_377	0.570187	2.81291e-05
	P75305	AZOR_MYCPN	FMN-dependent NADH-azoreductase	0.320668	0.0312771
	P75089	ALF_MYCPN	Fructose-bisphosphate aldolase	-0.499354	0.000308101
	Q50313	DPO3B_MYCPN	DNA polymerase III subunit beta	0.84262	1.00056e-10
	P78028	DYR_MYCPN	Dihydrofolate reductase	-0.53847	8.442e-05
	Q9EXD2	Y272_MYCPN	Uncharacterized protein MPN_272	-0.352704	0.016534
	P75391	ODPB_MYCPN	Pyruvate dehydrogenase E1 component subunit beta	0.779182	2.68707e-09
	P75483	Y294_MYCPN	Uncharacterized protein MPN_294	0.350621	0.016534
	P75359	PTA_MYCPN	Phosphate acetyltransferase	0.491713	0.000352932
	P75466	Y071_MYCPN	S-adenosyl-L-methionine-dependent methyltransferase mraW; UPF0011 protein MG056 homolog	0.394416	0.0056356
	P78027	RIR1_MYCPN	Ribonucleoside-diphosphate reductase subunit alpha	-0.773115	4.05598e-09
	P46775	RS4_MYCPN	30S ribosomal protein S4	-0.556888	4.67977e-05
	P75461	RIR2_MYCPN	Ribonucleoside-diphosphate reductase subunit beta	-1.12039	0
	P75516	Y258_MYCPN	Putative carbohydrate transport ATP-binding protein MPN_258	-0.371598	0.0107871
	P75061	PTHP_MYCPN	Phosphocarrier protein HPr	-0.39626	0.005758
	Q50327	ATPF_MYCPN	ATP synthase subunit b	-0.467064	0.000773602
	Q50360	HMW3_MYCPN	Cytadherence high molecular weight protein 3	-1.16207	0
	P75052	TYPH_MYCPN	Thymidine phosphorylase	-0.300045	0.0486514
	Q50329	ATPA_MYCPN	ATP synthase subunit alpha	-0.412939	0.00360789
	P75395	Y387_MYCPN	Uncharacterized protein MG269 homolog	-0.92432	8.77594e-13
	P75541	RS18_MYCPN	30S ribosomal protein S18	-0.475799	0.000642252
	P75233	RNC_MYCPN	Ribonuclease 3	-0.444027	0.00150723
	P75581	RS10_MYCPN	30S ribosomal protein S10	-0.334054	0.0251268
	P78029	TYSY_MYCPN	Thymidylate synthase	-0.607183	7.70709e-06
	P75470	Y311_MYCPN	Uncharacterized protein MG218.1 homolog	-0.449752	0.00127372
	P75518	Y256_MYCPN	Uncharacterized protein MG117 homolog	-0.607183	7.70709e-06
	P75502	Y275_MYCPN	Uncharacterized protein MG134 homolog	0.690877	1.82229e-07
	Q59549	DNAA_MYCPN	Chromosomal replication initiator protein dnaA	0.391217	0.00598751
	Q50365	HMW1_MYCPN	Cytadherence high molecular weight protein 1	-0.472882	0.000693692
	P75295	Y491_MYCPN	Uncharacterized protein MPN_491	0.560252	3.88578e-05
	P75540	RL9_MYCPN	50S ribosomal protein L9	-0.553802	4.93014e-05
	P75399	Y381_MYCPN	Uncharacterized protein MG263 homolog; Uncharacterized protein MPN_427; Uncharacterized protein MG265 homolog	0.513943	0.000179496
	Q50328	ATPD_MYCPN	ATP synthase subunit delta	-0.421351	0.0028314
	P75579	RL4_MYCPN	50S ribosomal protein L4	-0.382507	0.00817677
	P75106	KTHY_MYCPN	Thymidylate kinase	0.482724	0.000474113
	P75577	RL2_MYCPN	50S ribosomal protein L2	-0.334054	0.0251268
	Q9EXC9	Y254_MYCPN	Protein MG115 homolog	0.373495	0.00950906
	P75306	Y478_MYCPN	UPF0082 protein MG332 homolog	0.365367	0.0115735
	P75471	HMW2_MYCPN	Cytadherence high molecular weight protein 2	-0.55998	4.29095e-05
	P75522	RPE_MYCPN	Probable ribulose-phosphate 3-epimerase	0.322348	0.0303827
	P75094	Y019_MYCPN	Putative ABC transporter ATP-binding protein MG015 homolog	-0.344682	0.0201594
	P75401	Y381_MYCPN	Uncharacterized protein MG263 homolog; Uncharacterized protein MPN_427; Uncharacterized protein MG265 homolog	0.587061	1.45232e-05
	P75386	SPOT_MYCPN	Probable guanosine-3',5'-bis(diphosphate) 3'-pyrophosphohydrolase	0.302052	0.0451182
	Q50341	MGP3_MYCPN	Mgp-operon protein 3	-0.709921	9.5132e-08
	P75354	DNAJM_MYCPN	DnaJ-like protein MG200 homolog	-0.699652	1.47739e-07
	P75588	Y157_MYCPN	Uncharacterized protein MG144 homolog	-0.553802	4.93014e-05
	P75383	Y400_MYCPN	Uncharacterized protein MG281 homolog	0.784068	2.27643e-09
	P75167	GPMI_MYCPN	2,3-bisphosphoglycerate-independent phosphoglycerate mutase	-0.452623	0.00118174
	P75441	Y337_MYCPN	Uncharacterized protein MG241 homolog	0.337385	0.0218483
	P75229	Y549_MYCPN	Uncharacterized protein MG371 homolog	-0.302633	0.0468376
	P78021	DNLJ_MYCPN	DNA ligase	0.337385	0.0218483
	P75422	Y358_MYCPN	Uncharacterized protein MG255 homolog	0.302903	0.044742
	P75506	CNPD_MYCPN	2',3'-cyclic-nucleotide 2'-phosphodiesterase	0.64394	1.5855e-06
	Q50288	Y200_MYCPN	Uncharacterized lipoprotein MPN_200	-0.502325	0.000284178
	P75095	Y018_MYCPN	Putative ABC transporter ATP-binding protein MG014 homolog	0.499904	0.000284178
	P75109	Y684_MYCPN	Uncharacterized ABC transporter permease MG468 homolog	0.540175	7.21641e-05

## Sheet: Label Free
	Supplementary Table ST2F: List of proteins with significant changes in abundance (Label Free)
	LDH vs WT (n=3)
	Uniprot Accession	Uniprot ID	Description	Fold Change (log2(LDH/WT))	Adjusted p-value
	P78007	LDH_MYCPN	L-lactate dehydrogenase	-4.64545	0.00126674
	P78028	DYR_MYCPN	Dihydrofolate reductase	-2.56796	0.00174887
	P75070	KITH_MYCPN	Thymidine kinase	-2.37314	3.7327e-10
	P75460	NRDI_MYCPN	Protein nrdI	-2.04134	7.97958e-05
	P75461	RIR2_MYCPN	Ribonucleoside-diphosphate reductase subunit beta	-1.60563	9.42104e-15
	P78027	RIR1_MYCPN	Ribonucleoside-diphosphate reductase subunit alpha	-1.45451	0
	P78029	TYSY_MYCPN	Thymidylate synthase	-1.20278	3.83056e-07
	P75206	AMPA_MYCPN	Probable cytosol aminopeptidase	-0.925149	0
	P75177	DPO3X_MYCPN	DNA polymerase III subunit gamma/tau	-0.806669	0.000967093
	P75115	Y677_MYCPN	Uncharacterized protein MG461 homolog	-0.608715	0.0497655
	P78003	METK_MYCPN	S-adenosylmethionine synthetase	-0.575447	0.00287893
	P09924	DEOC_MYCPN	Deoxyribose-phosphate aldolase	-0.529254	0.0106661
	P75489	Y288_MYCPN	Uncharacterized lipoprotein MPN_288	-0.4759	0.0380247
	P75053	DEOD_MYCPN	Purine nucleoside phosphorylase deoD-type	-0.441529	0.0280489
	P75538	Y233_MYCPN	Uncharacterized lipoprotein MG095 homolog	-0.404639	0.0188554
	P78004	DNAJ_MYCPN	Chaperone protein dnaJ	-0.387552	0.00201562
	P75475	ARCA_MYCPN	Putative arginine deiminase; Arginine deiminase-like protein	-0.364352	0.0013153
	Q50327	ATPF_MYCPN	ATP synthase subunit b	-0.311976	0.0408562
	P78021	DNLJ_MYCPN	DNA ligase	0.252489	0.0117072
	P11311	ADP1_MYCPN	Adhesin P1	0.259148	0.00633861
	P78032	TOP1_MYCPN	DNA topoisomerase 1	0.261509	0.00452985
	P75310	Y474_MYCPN	Uncharacterized protein MG328 homolog	0.285823	0.00421758
	P75420	RF1_MYCPN	Peptide chain release factor 1	0.313695	0.00863258
	P75529	RNR_MYCPN	Ribonuclease R	0.361578	1.28571e-05
	P75049	Y067_MYCPN	Protein MG054 homolog	0.362443	0.0135252
	Q9EXD3	Y377_MYCPN	Uncharacterized protein MPN_377	0.368012	0.000271756
	P75542	SSB_MYCPN	Single-stranded DNA-binding protein	0.369962	0.0195743
	P75189	ENO_MYCPN	Enolase	0.38037	0.0323263
	Q50313	DPO3B_MYCPN	DNA polymerase III subunit beta	0.383259	0.00166441
	P75516	Y258_MYCPN	Putative carbohydrate transport ATP-binding protein MPN_258	0.391865	6.07375e-06
	P75440	Y338_MYCPN	Uncharacterized protein MG242 homolog	0.417047	0.000716731
	P75167	GPMI_MYCPN	2,3-bisphosphoglycerate-independent phosphoglycerate mutase	0.430112	0.0474261
	P75247	CLPB_MYCPN	Chaperone protein clpB	0.445468	1.15295e-05
	P75559	SECA_MYCPN	Protein translocase subunit secA	0.463685	2.9034e-05
	P75033	Y153_MYCPN	Uncharacterized ATP-dependent helicase MG140 homolog	0.464694	2.78089e-09
	P75107	SYS_MYCPN	Seryl-tRNA synthetase	0.468688	0.0370581
	P75313	AMPP_MYCPN	Putative Xaa-Pro aminopeptidase	0.469126	0.0301165
	P75483	Y294_MYCPN	Uncharacterized protein MPN_294	0.487974	1.38394e-07
	P75258	SYI_MYCPN	Isoleucyl-tRNA synthetase	0.488732	0.0189041
	P75591	NUSA_MYCPN	Transcription elongation protein nusA	0.497115	0.0106661
	P75521	SYN_MYCPN	Asparaginyl-tRNA synthetase	0.512123	0.0148715
	P75361	P115_MYCPN	Protein P115 homolog	0.516355	0.000662438
	P75269	Y518_MYCPN	Uncharacterized protein MG343 homolog	0.518905	0.00918
	P75391	ODPB_MYCPN	Pyruvate dehydrogenase E1 component subunit beta	0.519565	0.00145279
	P75298	CSD_MYCPN	Probable cysteine desulfurase	0.525018	0.000656742
	P75386	SPOT_MYCPN	Probable guanosine-3',5'-bis(diphosphate) 3'-pyrophosphohydrolase	0.538385	0.000976396
	P75344	DNAK_MYCPN	Chaperone protein dnaK	0.542916	0.00312888
	P75522	RPE_MYCPN	Probable ribulose-phosphate 3-epimerase	0.553612	4.81159e-05
	P78031	KPYK_MYCPN	Pyruvate kinase	0.555132	0.000700176
	P75392	ODP2_MYCPN	Dihydrolipoyllysine-residue acetyltransferase component of pyruvate dehydrogenase complex	0.576181	0.000135804
	P75040	Y077_MYCPN	Uncharacterized protein MG061 homolog 2	0.59188	0.0195639
	Q50316	Y685_MYCPN	Putative ABC transporter ATP-binding protein MG468.1 homolog	0.611248	0.0107162
	P75454	TIG_MYCPN	Trigger factor	0.617663	3.86257e-05
	P75122	SYY_MYCPN	Tyrosyl-tRNA synthetase	0.619245	0.00667606
	P75174	Y621_MYCPN	Uncharacterized protein MG423 homolog	0.62967	0.00475609
	Q50304	RS8_MYCPN	30S ribosomal protein S8	0.630367	0.000142825
	P75539	DNAB_MYCPN	Replicative DNA helicase	0.630509	0.0117072
	P75250	IPYR_MYCPN	Inorganic pyrophosphatase	0.641645	0.00403764
	P75548	HPRK_MYCPN	HPr kinase/phosphorylase	0.659239	0.0271227
	P75358	G3P_MYCPN	Glyceraldehyde-3-phosphate dehydrogenase	0.668456	6.05277e-05
	P75127	Y664_MYCPN	UPF0230 protein MG450 homolog; UPF0230 protein MG326 homolog	0.669893	0.0071558
	Q50295	RPOA_MYCPN	DNA-directed RNA polymerase subunit alpha	0.672318	1.0813e-07
	Q50303	RL6_MYCPN	50S ribosomal protein L6	0.677617	0.0406741
	Q50302	RL18_MYCPN	50S ribosomal protein L18	0.679537	0.0291288
	P75563	SYFB_MYCPN	Phenylalanyl-tRNA synthetase beta chain	0.683418	5.10732e-05
	P75394	LPLA_MYCPN	Probable lipoate-protein ligase A	0.696953	0.000116335
	P75223	Y555_MYCPN	Uncharacterized protein MG377 homolog	0.732908	1.15295e-05
	P75184	Y611_MYCPN	Uncharacterized lipoprotein MG412 homolog	0.737256	0.00299045
	P75541	RS18_MYCPN	30S ribosomal protein S18	0.741517	0.0106661
	P75159	T1SX_MYCPN	Putative type I restriction enzyme specificity protein MPN_638	0.758114	4.5774e-10
	P75327	Y456_MYCPN	Uncharacterized lipoprotein MG321 homolog	0.778425	3.34346e-09
	P78019	GREA_MYCPN	Transcription elongation factor greA	0.786725	4.9002e-05
	P75360	Y381_MYCPN	Uncharacterized protein MG263 homolog; Uncharacterized protein MPN_427; Uncharacterized protein MG265 homolog	0.805005	0.0128876
	P75225	SYT_MYCPN	Threonyl-tRNA synthetase	0.812372	0.0148942
	Q50306	RL5_MYCPN	50S ribosomal protein L5	0.818679	2.9034e-05
	P75543	RS6_MYCPN	30S ribosomal protein S6	0.832833	0.0249979
	P75517	GALE_MYCPN	UDP-glucose 4-epimerase	0.87032	0.00660619
	P78013	RPOB_MYCPN	DNA-directed RNA polymerase subunit beta	0.887905	3.40455e-10
	P41204	RL16_MYCPN	50S ribosomal protein L16	0.891853	0.0351614
	P75368	SYA_MYCPN	Alanyl-tRNA synthetase	0.893312	2.30815e-13
	P75493	Y284_MYCPN	Uncharacterized lipoprotein MPN_284	0.894519	1.44501e-10
	P75218	ARCA_MYCPN	Putative arginine deiminase; Arginine deiminase-like protein	0.904165	1.46317e-06
	P75395	Y387_MYCPN	Uncharacterized protein MG269 homolog	0.922991	8.85122e-08
	P75090	RPOE_MYCPN	Probable DNA-directed RNA polymerase subunit delta	0.936117	0.00119496
	P75050	MANB_MYCPN	Phosphomannomutase	0.94082	5.49283e-05
	P75045	Y072_MYCPN	Uncharacterized protein MG057 homolog	0.954168	0.018276
	P75353	Y121_MYCPN	Uncharacterized protein MG202 homolog	0.957221	0.0152325
	P54125	PEPF_MYCPN	Oligoendopeptidase F homolog	0.965022	0
	P75359	PTA_MYCPN	Phosphate acetyltransferase	0.976043	0.00349902
	P78018	PGK_MYCPN	Phosphoglycerate kinase	0.985908	2.84049e-08
	Q50314	PARA_MYCPN	ParA family protein MPN_688	0.987734	2.38431e-05
	P75271	RPOC_MYCPN	DNA-directed RNA polymerase subunit beta'	1.00493	2.28875e-10
	P75404	DPO3A_MYCPN	Uncharacterized protein MG010 homolog; DNA primase; DNA polymerase III subunit alpha	1.00867	0.00571394
	P75569	PTG3C_MYCPN	PTS system glucose-specific EIICBA component	1.01294	3.07414e-08
	P75518	Y256_MYCPN	Uncharacterized protein MG117 homolog	1.03083	0.000123149
	P75161	RRF_MYCPN	Ribosome-recycling factor	1.04512	0.00149703
	Q50365	HMW1_MYCPN	Cytadherence high molecular weight protein 1	1.04678	6.77006e-06
	P75304	SYV_MYCPN	Valyl-tRNA synthetase	1.05085	0.00143141
	P78022	RPOD_MYCPN	RNA polymerase sigma factor rpoD	1.05348	1.55048e-05
	P75497	RNJ_MYCPN	Ribonuclease J	1.06198	0.000612342
	P75509	Y266_MYCPN	Uncharacterized protein MG127 homolog	1.07256	0.00106711
	P75471	HMW2_MYCPN	Cytadherence high molecular weight protein 2	1.0764	0
	P75531	TRXB_MYCPN	Thioredoxin reductase	1.09001	0.000879288
	P75519	Y255_MYCPN	Uncharacterized protein MG116 homolog	1.10296	8.96718e-10
	P78034	PTH_MYCPN	Peptidyl-tRNA hydrolase	1.11404	0.0357136
	P75482	Y295_MYCPN	Uncharacterized protein MG210.1 homolog	1.12107	3.0619e-06
	Q50360	HMW3_MYCPN	Cytadherence high molecular weight protein 3	1.12363	4.09113e-11
	P75551	OPPF_MYCPN	Oligopeptide transport ATP-binding protein oppF	1.15262	4.61631e-12
	P75212	Y566_MYCPN	Uncharacterized protein MG385 homolog; Uncharacterized protein MG293 homolog	1.15916	0.000117711
	P75553	OPPC_MYCPN	Oligopeptide transport system permease protein oppC	1.1637	0.00191438
	P75389	NAOX_MYCPN	Probable NADH oxidase	1.18802	0
	P75579	RL4_MYCPN	50S ribosomal protein L4	1.19767	0.00191043
	P75170	Y625_MYCPN	Uncharacterized protein MG427 homolog	1.25794	3.4334e-06
	P75295	Y491_MYCPN	Uncharacterized protein MPN_491	1.26759	0.000150553
	P75367	Y566_MYCPN	Uncharacterized protein MG385 homolog; Uncharacterized protein MG293 homolog	1.27935	1.1407e-07
	P75470	Y311_MYCPN	Uncharacterized protein MG218.1 homolog	1.30138	5.2509e-10
	P75466	Y071_MYCPN	S-adenosyl-L-methionine-dependent methyltransferase mraW; UPF0011 protein MG056 homolog	1.34253	8.20677e-13
	P75511	Y264_MYCPN	Uncharacterized protein MG125 homolog	1.37678	1.46317e-06
	P75525	PPH_MYCPN	Putative protein phosphatase	1.39531	2.23622e-10
	P75564	SYFA_MYCPN	Phenylalanyl-tRNA synthetase alpha chain	1.558	0.0292224
	P75467	MRAZ_MYCPN	Protein mraZ	1.60489	1.00189e-07
	P75508	PPNK_MYCPN	Probable inorganic polyphosphate/ATP-NAD kinase	1.64052	1.29016e-07
	P75131	RS16_MYCPN	30S ribosomal protein S16	1.68899	0.0211031
	P78025	LON_MYCPN	ATP-dependent protease La	1.71708	8.96718e-10
	Q9EXD4	Y388_MYCPN	Uncharacterized protein MG269.1 homolog	1.72462	9.04397e-06
	P46775	RS4_MYCPN	30S ribosomal protein S4	1.89287	3.21456e-09
	P75545	RS7_MYCPN	30S ribosomal protein S7	1.91978	1.83777e-07
	Q59547	RL17_MYCPN	50S ribosomal protein L17	2.08261	0.027523
	P75540	RL9_MYCPN	50S ribosomal protein L9	2.08354	0.00239562
	P75330	P30_MYCPN	P30 adhesin	2.20456	0.0343138
	P75409	CARDS_MYCPN	ADP-ribosylating toxin CARDS	2.22753	1.51847e-08
	P75405	Y376_MYCPN	Uncharacterized protein MPN_376	2.32795	0
	P75513	Y262_MYCPN	Uncharacterized protein MG123 homolog	2.46711	0.0292224
	PrkC vs WT (n=3)
	Uniprot Accession	Uniprot ID	Description	Fold Change (log2(PrkC/WT))	Adjusted p-value
	Q50360	HMW3_MYCPN	Cytadherence high molecular weight protein 3	-3.994	0
	Q50341	MGP3_MYCPN	Mgp-operon protein 3	-3.15838	5.56634e-09
	P75461	RIR2_MYCPN	Ribonucleoside-diphosphate reductase subunit beta	-2.27228	0
	P75579	RL4_MYCPN	50S ribosomal protein L4	-2.03162	0.00755908
	P75460	NRDI_MYCPN	Protein nrdI	-1.85207	5.42752e-07
	P75121	Y670_MYCPN	Uncharacterized protein MG456 homolog	-1.81896	2.53817e-05
	P75070	KITH_MYCPN	Thymidine kinase	-1.68234	2.24294e-07
	P78027	RIR1_MYCPN	Ribonucleoside-diphosphate reductase subunit alpha	-1.63446	4.32743e-08
	P75053	DEOD_MYCPN	Purine nucleoside phosphorylase deoD-type	-1.63257	1.03806e-09
	P75541	RS18_MYCPN	30S ribosomal protein S18	-1.46417	0.0236805
	P75354	DNAJM_MYCPN	DnaJ-like protein MG200 homolog	-1.35297	8.45836e-05
	P75052	TYPH_MYCPN	Thymidine phosphorylase	-1.34999	2.18705e-12
	P75529	RNR_MYCPN	Ribonuclease R	-1.32574	0.0140429
	P78029	TYSY_MYCPN	Thymidylate synthase	-1.25792	4.46128e-06
	P78028	DYR_MYCPN	Dihydrofolate reductase	-1.25415	2.26726e-06
	P75092	PIP_MYCPN	Putative proline iminopeptidase	-1.22925	0.0439448
	P75090	RPOE_MYCPN	Probable DNA-directed RNA polymerase subunit delta	-1.20511	0.0274843
	P75329	Y454_MYCPN	Uncharacterized protein MG319 homolog	-1.18766	0.00171966
	P75205	CH10_MYCPN	10 kDa chaperonin	-1.12806	2.50618e-05
	P75040	Y077_MYCPN	Uncharacterized protein MG061 homolog 2	-1.1025	0.00122337
	P75247	CLPB_MYCPN	Chaperone protein clpB	-1.09178	0
	P75221	MNMG_MYCPN	tRNA uridine 5-carboxymethylaminomethyl modification enzyme mnmG	-1.08262	0.0317704
	Q50329	ATPA_MYCPN	ATP synthase subunit alpha	-1.06593	0.0240975
	Q50327	ATPF_MYCPN	ATP synthase subunit b	-1.04803	2.19961e-06
	P75581	RS10_MYCPN	30S ribosomal protein S10	-1.02624	0.000172609
	P75069	SYH_MYCPN	Histidyl-tRNA synthetase	-1.02164	0.000457962
	P22446	GYRA_MYCPN	DNA gyrase subunit A	-1.01481	1.17313e-05
	P75229	Y549_MYCPN	Uncharacterized protein MG371 homolog	-1.00605	0.0445162
	P46775	RS4_MYCPN	30S ribosomal protein S4	-0.978109	9.15276e-06
	P75560	RS2_MYCPN	30S ribosomal protein S2	-0.97797	0.00384759
	P75123	OHRL_MYCPN	Organic hydroperoxide resistance protein-like	-0.950088	0.0259913
	P78012	CH60_MYCPN	60 kDa chaperonin	-0.948257	1.49863e-09
	P75168	PT1_MYCPN	Phosphoenolpyruvate-protein phosphotransferase	-0.932621	0.00188819
	P75493	Y284_MYCPN	Uncharacterized lipoprotein MPN_284	-0.932125	1.27527e-08
	Q50314	PARA_MYCPN	ParA family protein MPN_688	-0.914575	0.000639055
	P75344	DNAK_MYCPN	Chaperone protein dnaK	-0.894788	3.17921e-06
	P75039	PTF3A_MYCPN	PTS system fructose-specific EIIABC component	-0.886746	0.000337901
	P75050	MANB_MYCPN	Phosphomannomutase	-0.881148	0.00552632
	P75179	RS9_MYCPN	30S ribosomal protein S9	-0.880404	0.000262424
	P75177	DPO3X_MYCPN	DNA polymerase III subunit gamma/tau	-0.87897	2.97449e-05
	P75215	OBG_MYCPN	MPN563	-0.857124	0.0177506
	P41205	RS3_MYCPN	30S ribosomal protein S3	-0.847099	0.000362834
	P75093	Y020_MYCPN	Uncharacterized ATP-dependent helicase MPN_020	-0.836197	0.000808271
	P75516	Y258_MYCPN	Putative carbohydrate transport ATP-binding protein MPN_258	-0.826137	1.18128e-13
	P75539	DNAB_MYCPN	Replicative DNA helicase	-0.775125	0.0236805
	P75089	ALF_MYCPN	Fructose-bisphosphate aldolase	-0.767516	0.00188819
	P75580	RL3_MYCPN	50S ribosomal protein L3	-0.7475	0.000802983
	P75246	Y532_MYCPN	Uncharacterized protein MG356 homolog	-0.746904	0.00188819
	P75578	RL23_MYCPN	50S ribosomal protein L23	-0.740292	0.00561288
	P75167	GPMI_MYCPN	2,3-bisphosphoglycerate-independent phosphoglycerate mutase	-0.725578	0.000105811
	P75404	DPO3A_MYCPN	Uncharacterized protein MG010 homolog; DNA primase; DNA polymerase III subunit alpha	-0.707173	0.000591476
	P75313	AMPP_MYCPN	Putative Xaa-Pro aminopeptidase	-0.699333	0.000314502
	P75304	SYV_MYCPN	Valyl-tRNA synthetase	-0.681099	0.00561288
	P78004	DNAJ_MYCPN	Chaperone protein dnaJ	-0.680302	0.000821117
	P75206	AMPA_MYCPN	Probable cytosol aminopeptidase	-0.6689	1.62494e-07
	P75545	RS7_MYCPN	30S ribosomal protein S7	-0.66112	0.00933449
	P75486	Y291_MYCPN	Uncharacterized protein MG208 homolog	-0.644998	0.0224318
	P11311	ADP1_MYCPN	Adhesin P1	-0.631902	0.000873054
	P78032	TOP1_MYCPN	DNA topoisomerase 1	-0.627813	0.000236974
	P75061	PTHP_MYCPN	Phosphocarrier protein HPr	-0.59574	0.0411716
	P75063	Y051_MYCPN	Uncharacterized protein MG039 homolog	-0.56022	0.000731172
	Q50304	RS8_MYCPN	30S ribosomal protein S8	-0.556543	0.0236805
	P75588	Y157_MYCPN	Uncharacterized protein MG144 homolog	-0.55537	0.0240975
	Q50331	ATPB_MYCPN	ATP synthase subunit beta	-0.54757	4.58553e-05
	P75062	Y052_MYCPN	Uncharacterized lipoprotein MG040 homolog	-0.541103	0.00838878
	Q50306	RL5_MYCPN	50S ribosomal protein L5	-0.534125	0.000965034
	P75084	Y030_MYCPN	Uncharacterized protein MG027 homolog	-0.528453	0.0201957
	P75359	PTA_MYCPN	Phosphate acetyltransferase	-0.525729	0.00603954
	P75533	GATB_MYCPN	Aspartyl/glutamyl-tRNA(Asn/Gln) amidotransferase subunit B	-0.524964	0.000655634
	P23568	EFTU_MYCPN	Elongation factor Tu	-0.515771	0.0445182
	P75044	KPRS_MYCPN	Ribose-phosphate pyrophosphokinase	-0.446702	0.0129209
	P09924	DEOC_MYCPN	Deoxyribose-phosphate aldolase	-0.439574	5.67429e-06
	P75386	SPOT_MYCPN	Probable guanosine-3',5'-bis(diphosphate) 3'-pyrophosphohydrolase	-0.435141	0.0256405
	P22447	GYRB_MYCPN	DNA gyrase subunit B	-0.430006	0.000655634
	P75387	Y396_MYCPN	Uncharacterized protein MG277 homolog	-0.423626	0.00526404
	Q50316	Y685_MYCPN	Putative ABC transporter ATP-binding protein MG468.1 homolog	-0.393866	0.00205654
	P78021	DNLJ_MYCPN	DNA ligase	-0.385245	0.0279899
	P78010	TPIS_MYCPN	Triosephosphate isomerase	-0.361436	0.0236805
	Q50295	RPOA_MYCPN	DNA-directed RNA polymerase subunit alpha	-0.354929	0.00185695
	P75041	Y076_MYCPN	Uncharacterized protein MG061 homolog 1	-0.323796	0.0180807
	P75049	Y067_MYCPN	Protein MG054 homolog	-0.305901	0.0013846
	P75538	Y233_MYCPN	Uncharacterized lipoprotein MG095 homolog	-0.295443	0.00745652
	P75176	UVRA_MYCPN	UvrABC system protein A	-0.286915	0.000337901
	P75426	DPO3A_MYCPN	Uncharacterized protein MG010 homolog; DNA primase; DNA polymerase III subunit alpha	-0.281331	0.0236805
	P75271	RPOC_MYCPN	DNA-directed RNA polymerase subunit beta'	-0.276936	0.00771981
	P75114	SYE_MYCPN	Glutamyl-tRNA synthetase	-0.270099	0.028945
	P75558	UVRB_MYCPN	UvrABC system protein B	-0.232392	0.0481267
	P75245	ACKA_MYCPN	Acetate kinase	-0.209936	0.032851
	P75294	ULAE_MYCPN	Probable L-ribulose-5-phosphate 3-epimerase ulaE	0.320215	0.0343553
	P78003	METK_MYCPN	S-adenosylmethionine synthetase	0.333314	0.0369923
	P75109	Y684_MYCPN	Uncharacterized ABC transporter permease MG468 homolog	0.384923	0.0481267
	P75361	P115_MYCPN	Protein P115 homolog	0.415221	5.67429e-06
	P75223	Y555_MYCPN	Uncharacterized protein MG377 homolog	0.43443	0.0343553
	P75391	ODPB_MYCPN	Pyruvate dehydrogenase E1 component subunit beta	0.441217	0.00054372
	Q9EXD3	Y377_MYCPN	Uncharacterized protein MPN_377	0.490017	0.0291148
	P75466	Y071_MYCPN	S-adenosyl-L-methionine-dependent methyltransferase mraW; UPF0011 protein MG056 homolog	0.619006	2.83237e-06
	P75189	ENO_MYCPN	Enolase	0.676788	0.000402218
	P75305	AZOR_MYCPN	FMN-dependent NADH-azoreductase	0.757814	0.0309418
	P75467	MRAZ_MYCPN	Protein mraZ	0.757986	5.56634e-09
	P75399	Y381_MYCPN	Uncharacterized protein MG263 homolog; Uncharacterized protein MPN_427; Uncharacterized protein MG265 homolog	0.838282	0.00342485
	Q59549	DNAA_MYCPN	Chromosomal replication initiator protein dnaA	0.990455	0.0013846
	P75531	TRXB_MYCPN	Thioredoxin reductase	1.0218	0.0193845
	P75535	Y236_MYCPN	Uncharacterized protein MG098 homolog	1.09509	0.00188819
	P75532	Y239_MYCPN	Uncharacterized HTH-type transcriptional regulator MG101 homolog	1.27084	0.012782
