# Supplementary material for: Integrative quantitation enables a comprehensive proteome comparison of two Mycoplasma pneumoniae genetic perturbations
Source: Royal Society of Chemistry journal article supplement (doi:10.1039/c3mb25581f), 2013-03-22
Supplement: c3mb25581f_4.xlsx [file c3mb25581f_4.xlsx]

## Sheet: Sheet1
	Supplementary Table ST4: List of proteins with significant changes in abundance in at least three different quantitation methods (Ldh vs WT)
	Uniprot Accession	Uniprot ID	Description
	Increased protein abundance
	P46775	RS4_MYCPN	30S ribosomal protein S4
	P75050	MANB_MYCPN	Phosphomannomutase
	P75161	RRF_MYCPN	Ribosome-recycling factor
	P75239	RL7_MYCPN	50S ribosomal protein L7/L12
	P75258	SYI_MYCPN	Isoleucyl-tRNA synthetase
	P75295	Y491_MYCPN	Uncharacterized protein MPN_491
	P75383	Y400_MYCPN	Uncharacterized protein MG281 homolog
	P75389	NAOX_MYCPN	Probable NADH oxidase
	P75405	Y376_MYCPN	Uncharacterized protein MPN_376
	P75409	CARDS_MYCPN	ADP-ribosylating toxin CARDS
	P75481	Y297_MYCPN	Uncharacterized protein MG211 homolog
	P75482	Y295_MYCPN	Uncharacterized protein MG210.1 homolog
	P75504	YHIT_MYCPN	Uncharacterized 16.1 kDa HIT-like protein
	P75508	PPNK_MYCPN	Probable inorganic polyphosphate/ATP-NAD kinase
	P75509	Y266_MYCPN	Uncharacterized protein MG127 homolog
	P75512	THIO_MYCPN	Thioredoxin
	P75525	PPH_MYCPN	Putative protein phosphatase
	P75541	RS18_MYCPN	30S ribosomal protein S18
	P75542	SSB_MYCPN	Single-stranded DNA-binding protein
	P75545	RS7_MYCPN	30S ribosomal protein S7
	P75551	OPPF_MYCPN	Oligopeptide transport ATP-binding protein oppF
	P75552	OPPD_MYCPN	Oligopeptide transport ATP-binding protein oppD
	P75554	OPPB_MYCPN	Oligopeptide transport system permease protein oppB
	P75564	SYFA_MYCPN	Phenylalanyl-tRNA synthetase alpha chain
	P75577	RL2_MYCPN	50S ribosomal protein L2
	P78017	GRPE_MYCPN	Protein grpE
	P78025	LON_MYCPN	ATP-dependent protease La
	P78032	TOP1_MYCPN	DNA topoisomerase 1
	P78035	RL1_MYCPN	50S ribosomal protein L1
	Q50295	RPOA_MYCPN	DNA-directed RNA polymerase subunit alpha
	Q50306	RL5_MYCPN	50S ribosomal protein L5
	Q50314	PARA_MYCPN	ParA family protein MPN_688
	Q50365	HMW1_MYCPN	Cytadherence high molecular weight protein 1
	Q9EXD4	Y388_MYCPN	Uncharacterized protein MG269.1 homolog
	Q9EXD8	ULAB_MYCPN	Ascorbate-specific phosphotransferase enzyme IIB component
	Decreased protein abundance
	P09924	DEOC_MYCPN	Deoxyribose-phosphate aldolase
	P75052	TYPH_MYCPN	Thymidine phosphorylase
	P75053	DEOD_MYCPN	Purine nucleoside phosphorylase deoD-type
	P75054	SRP54_MYCPN	Signal recognition particle protein
	P75061	PTHP_MYCPN	Phosphocarrier protein HPr
	P75062	Y052_MYCPN	Uncharacterized lipoprotein MG040 homolog
	P75063	Y051_MYCPN	Uncharacterized protein MG039 homolog
	P75070	KITH_MYCPN	Thymidine kinase
	P75089	ALF_MYCPN	Fructose-bisphosphate aldolase
	P75094	Y019_MYCPN	Putative ABC transporter ATP-binding protein MG015 homolog
	P75107	SYS_MYCPN	Seryl-tRNA synthetase
	P75109	Y684_MYCPN	Uncharacterized ABC transporter permease MG468 homolog
	P75129	MSRB_MYCPN	Peptide methionine sulfoxide reductase msrB
	P75177	DPO3X_MYCPN	DNA polymerase III subunit gamma/tau
	P75206	AMPA_MYCPN	Probable cytosol aminopeptidase
	P75248	Y530_MYCPN	Uncharacterized protein MG354 homolog
	P75460	NRDI_MYCPN	Protein nrdI
	P75461	RIR2_MYCPN	Ribonucleoside-diphosphate reductase subunit beta
	P75515	Y259_MYCPN	Uncharacterized protein MG120 homolog
	P75538	Y233_MYCPN	Uncharacterized lipoprotein MG095 homolog
	P78004	DNAJ_MYCPN	Chaperone protein dnaJ
	P78007	LDH_MYCPN	L-lactate dehydrogenase
	P78011	GLYA_MYCPN	Serine hydroxymethyltransferase
	P78012	CH60_MYCPN	60 kDa chaperonin
	P78027	RIR1_MYCPN	Ribonucleoside-diphosphate reductase subunit alpha
	P78028	DYR_MYCPN	Dihydrofolate reductase
	P78029	TYSY_MYCPN	Thymidylate synthase
	Q50327	ATPF_MYCPN	ATP synthase subunit b
	Q50329	ATPA_MYCPN	ATP synthase subunit alpha
	Q50330	ATPG_MYCPN	ATP synthase gamma chain
